# Supplementary material for: A Comprehensive Inter-Tissue Crosstalk Analysis Underlying Progression and Control of Obesity and Diabetes
Source: PubMed Central journal article supplement (PMC4511953; doi:10.1038/srep12340), 2015-07-23
Supplement: srep12340-s1.pdf [file srep12340-s1.pdf]

Supplementary information for the manuscript

**“A Comprehensive Inter-Tissue Cross-talk Analysis Underlying Progression and Control of Obesity and Diabetes”**

**Pawan Samdani<sup>1</sup>, Meet Singhal<sup>1</sup>, Neeraj Sinha<sup>2</sup>, Parul Tripathi<sup>2</sup>, Sachin Sharma<sup>2</sup>, Kamiya Tikoo<sup>2</sup>, Kanury VS Rao<sup>2</sup> and Dhiraj Kumar<sup>2\*</sup>**

<sup>1</sup> Department of Biochemical Engineering and Biotechnology, Indian Institute of Technology, Hauz Khas, New Delhi-110016

<sup>2</sup> Immunology Group, International Centre for Genetic Engineering and Biotechnology, Aruna Asaf Ali Marg, New Delhi-110067

\*Correspondence: [dhiraj@icgeb.res.in](mailto:dhiraj@icgeb.res.in)

| Serial No. | Supplementary Information | Title                                                                          |
|------------|---------------------------|--------------------------------------------------------------------------------|
| 1          | Supplementary Table S1    | List of tissues, experimental groups and time points                           |
| 2          | Supplementary Table S2    | List of Receptors, Ligands and interactions among them                         |
| 3          | Supplementary Table S3    | Manually curated list of receptors, ligands and interactions                   |
| 4          | Supplementary Table S4    | Tissue level cross talk list                                                   |
| 5          | Supplementary Table S5    | Molecular cross-talk list                                                      |
| 6          | Supplementary Table S6    | List of receptor-ligand interactions occurring at high frequency               |
| 7          | Supplementary Table S7    | Test of significance for figure 4                                              |
| 8          | Supplementary Table S8    | Test of significance for figure 5A and 5B                                      |
| 10         | Supplementary Figure S1   | Expression heat-map of genes across tissues and time points                    |
| 11         | Supplementary Figure S2   | Expression heat-map of genes belonging to inflammation and metabolism category |
| 12         | Supplementary Figure S3   | Differential dynamic tissue cross-talk                                         |

## **Supplementary text:**

### **Rationale behind selection of the tissues for this study**

The list of tissues taken and the time-course of experimentation is provided in supplementary table S1. The rationale behind selection of the panel of the tissues was derived from available literature in the field. Thus adipose tissues, both white and brown were obvious tissues to monitor <sup>1</sup>. As obesity and associated conditions are believed to emerge due to low level of chronic inflammation which is partly attributed to the macrophages that infiltrate the adipose tissues, we also included infiltrating macrophages from each of the adipose tissues considered <sup>2, 3</sup>. Further, splenic macrophages were selected to understand systemic inflammatory status of the macrophages, liver samples were considered for their significant influence on metabolism and homeostasis. Skeletal muscle show diverse responses under conditions of obesity and obesity induced insulin resistance <sup>4</sup> whereas hippocampus was selected because of the role this part of the brain plays in food habits and cognition <sup>5</sup>.

## **Supplementary methods:**

### **Animals and diet**

The details of experimental procedures were reported earlier <sup>6, 7</sup>. Briefly, all animal experiments were performed at BIONEEDS (Laboratory animals & Preclinical services) Bangalore, India, and approved by institutional animal ethics committee (IAEC). BIONEEDS is approved by committee for the purpose of control and supervision of experiments on animals (CPCSEA), Ministry of forests and environments, Government of India. We used C57BL/6 J mouse as a model for diet induced diabetes and obesity. Mice were kept at 12:12 hr light: dark photoperiod with ad libitum access to food and water. Weaned mice at the age of 3-4 weeks were divided randomly into groups (each contains 30 animals). One group was fed on low fat diet (LFD, D12492, Research diets Inc.USA) with 10% of calories coming from fat. Another group was fed with HFHSD with 60% of calories coming from fat (D03062301, Research diets Inc.USA), and yet another group of mice were fed on HFHSD and supplemented with an ethano-botanical formulation, KAL-1 (75 µg of KAL-1). The mice were periodically monitored over an eighteen weeks period. At the interval of every 3 weeks, five animals from each group were sacrificed and different tissues were extracted and frozen in liquid nitrogen prior to RNA extraction.

### **Kal-1 treatment**

Briefly, animals were fed on either normal diet/LFD or HFHSD. After two weeks of feeding animals on HFHSD, one group of animals were put on the herbal concoction named Kal-1 <sup>7</sup> while being fed on

HFHSD. At 0, 3, 6, 9, 12 and 15 weeks post Kal-1 treatment, animals were euthanized and a panel of tissues were harvested and quickly snap frozen in liquid nitrogen for further processing. From these samples, total RNA was isolated and microarray experiment was performed to profile transcriptional changes in these tissues as a function of time under HFHSD or HFHSD+Kal-1 treatment condition<sup>7</sup>. As an additional control to ensure the specificity of the effects of Kal-1 treatment, we had gavage controls for both the low-fat diet group and the high-fat diet group animals. The gavage control did not affect the phenotype of animals from either of the groups<sup>7</sup>.

### **Tissue isolation, RNA isolation and microarray**

Table S1 shows the list of tissues isolated and processed. In brief, Hippocampus, Liver, and Skeletal Muscle tissues were isolated and immediately snap frozen for subsequent RNA isolation. Additionally, Splenic macrophages, Brown Adipose (BA), White Adipose Epididymis (EA), White adipose Subcutaneous (SA), Infiltrating macrophages from SVC BA, SVC EA and SVC SA, respectively were also isolated using protocol described earlier<sup>3</sup>. Briefly SVC macrophages and adipocyte tissues were further processed separately using following protocols- adipose tissues (BA, EA and SA regions) were isolated, weighed and then collagenase solution was added (3 ml/g of the tissue). Tissues were homogenized and the tissue solution was kept in shaking water bath at 37°C for 45 minutes. After centrifugation at 3600 rpm for 20 minutes, the pellet was treated with erythrocyte lysis buffer and adipocytes layer was saved for further processing. The treated pellet was centrifuged at 3500rpm/10 min and the resulting pellet was dissolved in 1x PBS as SVC. The adipocytes layer obtained was further processed with collagenase and incubated at 37°C for 30 minutes in shaking water bath. After centrifugation at 3600 rpm for 20 min pellet was obtained and was kept as adipocytes. The SVC macrophages and splenic macrophages were isolated by magnetic separation using anti-CD11b antibody. The SVC macrophages and adipocytes for all the tissues were frozen and sent for RNA extraction. For every tissue and time points, microarray experiment was performed from three different animal independently.

### **Microarray data analysis**

The overall strategy of data normalization and finally getting a non-redundant set of genes that were differentially regulated has been described in our recent study<sup>6</sup>. Fold changes calculated for any gene in HFHSD or HFHSD+Kal1 animal tissues were normalized against corresponding expression values in the LFD mice. This helped filter out age related changes in gene expression and thereby allowing analysis of only those genes that were directly perturbed during obesity and diabetes progression.

### **Supplementary Table S1: List of tissues, experimental groups and time points**

LFC: Low Fat Control, HFHSD: High Fat High Sugar Diet, Kal1: ethno-botanical formulation.

### **Supplementary Table S2: List of Receptors, Ligands and interactions among them**

This table contains list of molecules (Sheet1 and Sheet2) that were downloaded from the databases and interactions (Sheet 3) among them. Many interactions in this table represented intra-cellular interactions.

### **Supplementary Table S3: Manually curated list of receptors, ligands and interactions**

To filter-out only genuine interactions between ligands and cell surface receptors, we manually searched for each interaction in different databases and experimental details.

### **Supplementary Table S4: Tissue level cross talk list**

Tissue cross-talk and participating receptor-ligand pairs are provided here in different worksheets (named accordingly). Please see methods for the details.

### **Supplementary Table S5: Molecular cross-talk list**

For the number of tissue pairs, a given receptor-ligand (Res-Sec) interaction was observed through our analysis is represented here across the time points of the study. Since there are 10 different tissues, for any given res-sec pair, a maximum of  $10^2$  i.e. 100 possible interactions are possible.

### **Supplementary Table S6: List of receptor-ligand interactions occurring at high frequency**

Receptor-ligand pairs that showed interaction at three or more than three time-points are listed in the table under HFHSD and HFHSD+Kal-1 conditions. Those highlighted in yellow are common between both the conditions.

### **Supplementary Table S7: Test of significance for the data in figure 4**

As described in the methods, hypothesis testing for two population proportion was conducted to test statistical significance in the data presented in figure 4.

### **Supplementary Table S8: Test of significance for the data in figure 5**

As described in the methods, hypothesis testing for two population proportion was conducted to test statistical significance in the data presented in figure 5.

### **Supplementary Figure S1: Expression heat-map of genes across tissues and time points**

Heat-maps capturing expression profile of receptors (S1A) and ligands (S1B) in HFHSD and HFHSD+Kal1 (S1C and S1D) group are presented here.

### **Supplementary Figure S2: Expression heat-map of genes belonging to inflammation and metabolism category**

Heat-maps capturing expression profiles of receptors and ligands in HFHSD and HFHSD+Kal1 belonging to inflammatory (S2A-S2D) and metabolism (S2E-S2H) classes are presented here.

### Supplementary Figure S3: Differential dynamic tissue cross-talk

For this analysis, along with up-regulated interactions, those interactions were also included where significant down-regulation of receptor, secreted molecule or both takes place in HFHSD+Kal-1 as compared to HFHSD. Here too, green diamonds represent receptors and pink circles represent secreted molecules. Solid lines suggest increased cross-talk in HFHSD+Kal1 as compared to HFHSD alone. Dotted lines represent decreased cross-talk in HSHD+Kal1 as compared to HFHSD alone.

### Supplementary References

1. Rosen, E.D. & Spiegelman, B.M. Adipocytes as regulators of energy balance and glucose homeostasis. *Nature* **444**, 847-853 (2006).
2. Gregor, M.F. & Hotamisligil, G.S. Inflammatory mechanisms in obesity. *Annu Rev Immunol* **29**, 415-445 (2011).
3. Weisberg, S.P. et al. Obesity is associated with macrophage accumulation in adipose tissue. *The Journal of clinical investigation* **112**, 1796-1808 (2003).
4. Eckardt, K., Taube, A. & Eckel, J. Obesity-associated insulin resistance in skeletal muscle: role of lipid accumulation and physical inactivity. *Rev Endocr Metab Disord* **12**, 163-172 (2011).
5. Martin, A.A. & Davidson, T.L. Human cognitive function and the obesogenic environment. *Physiol Behav* (2014).
6. Sinha, N., Sharma, S., Tripathi, P., Negi, S.K., Tikoo, K., Kumar, D., Rao, K. and Chatterjee, S. Molecular Signatures for Obesity and Associated Disorders Identified Through Partial Least Square Regression Models. *BMC Systems Biology* **In Press** (2014).
7. Tikoo, K., Misra, S., Rao, K.V., Tripathi, P. & Sharma, S. Immunomodulatory Role of an Ayurvedic Formulation on Imbalanced Immunometabolics during Inflammatory Responses of Obesity and Prediabetic Disease. *Evid Based Complement Alternat Med* **2013**, 795072 (2013).



Figure S1-B : Heatmap of secretory (HFHSD)

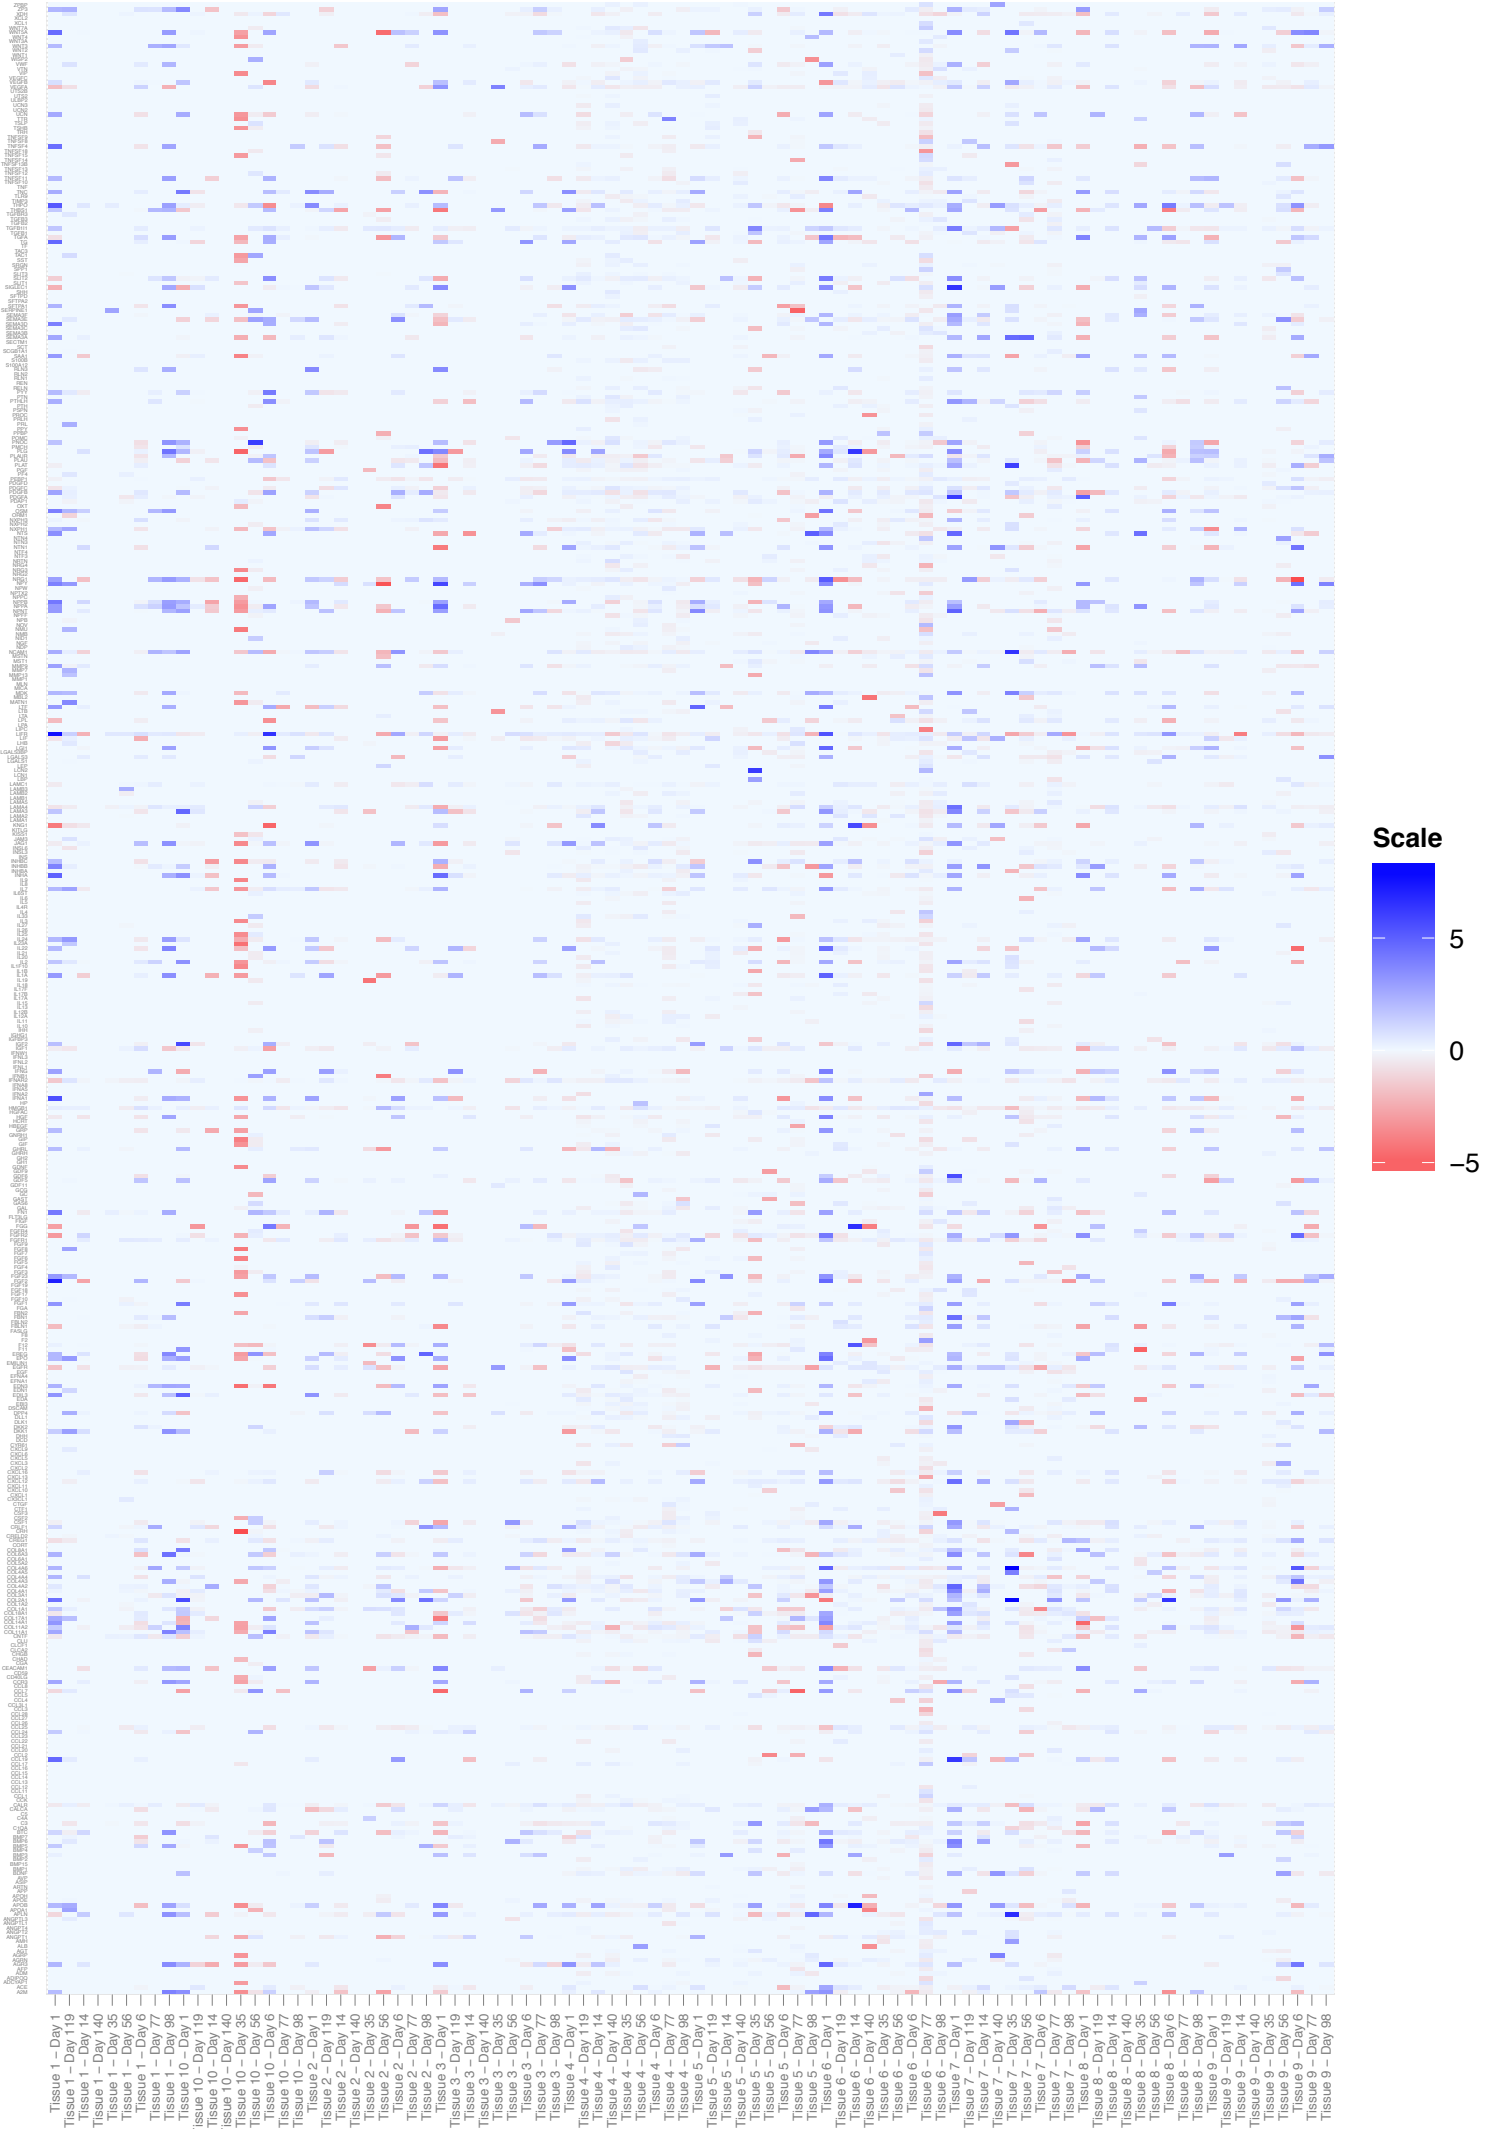



Figure S1-C : Heatmap of receptor (HFHSD+Kal1)

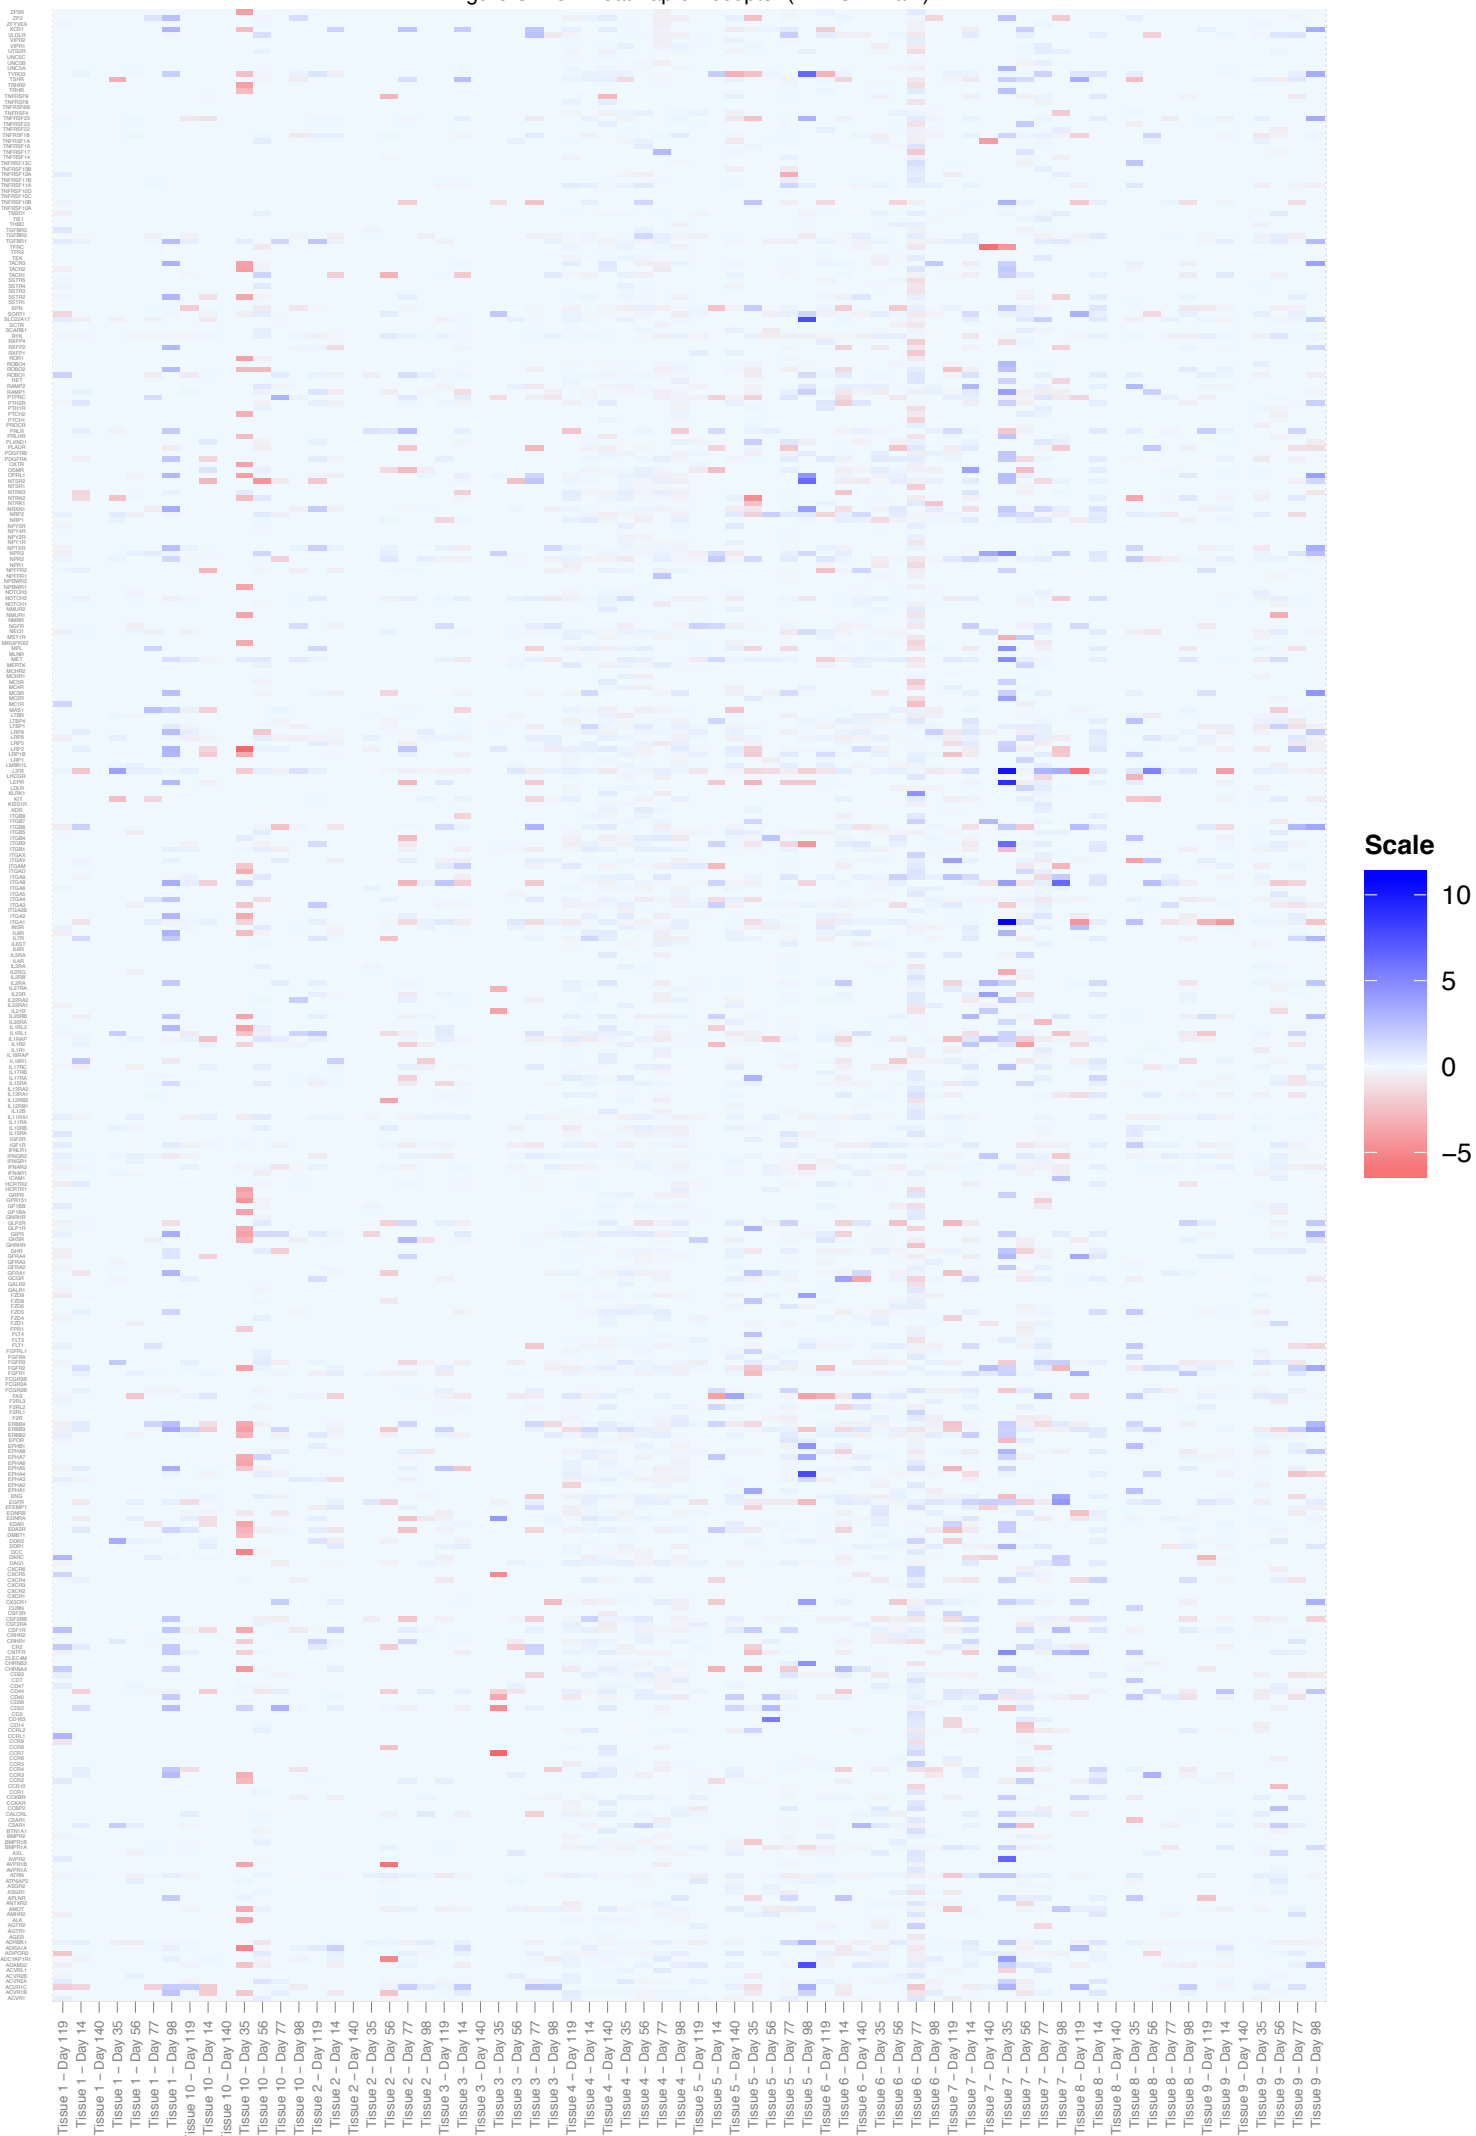



Figure S2-A : Heatmap of inflammatory receptor (HFHSD)

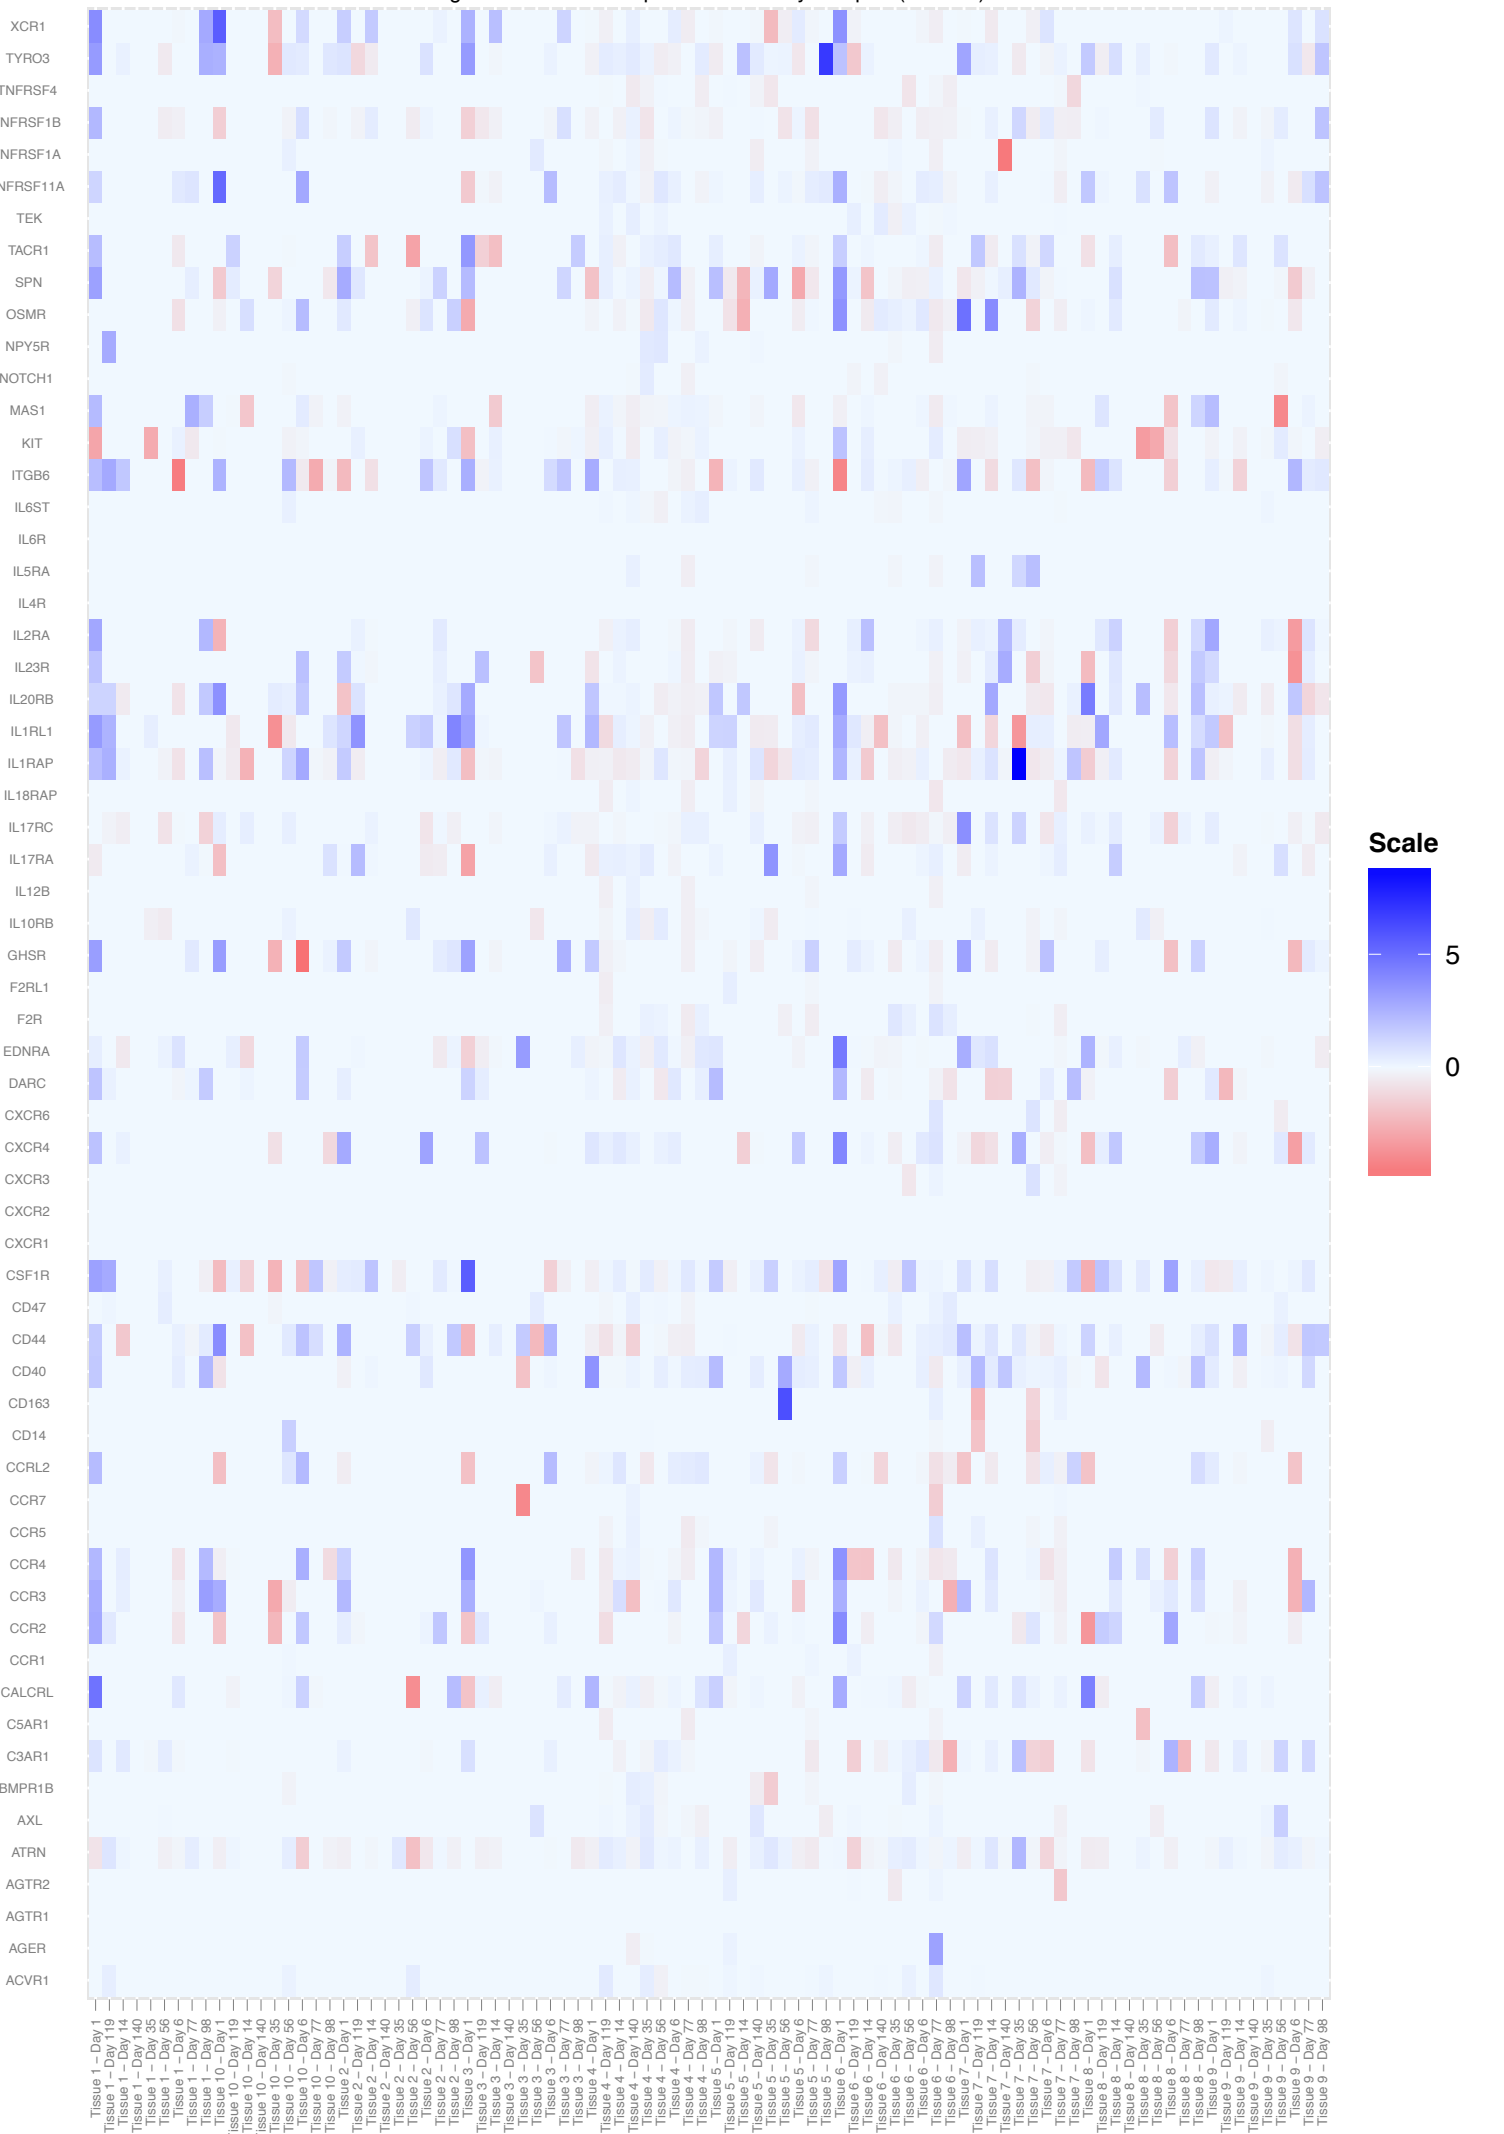

Figure S2-B : Heatmap of inflammatory secretory (HFHS)D

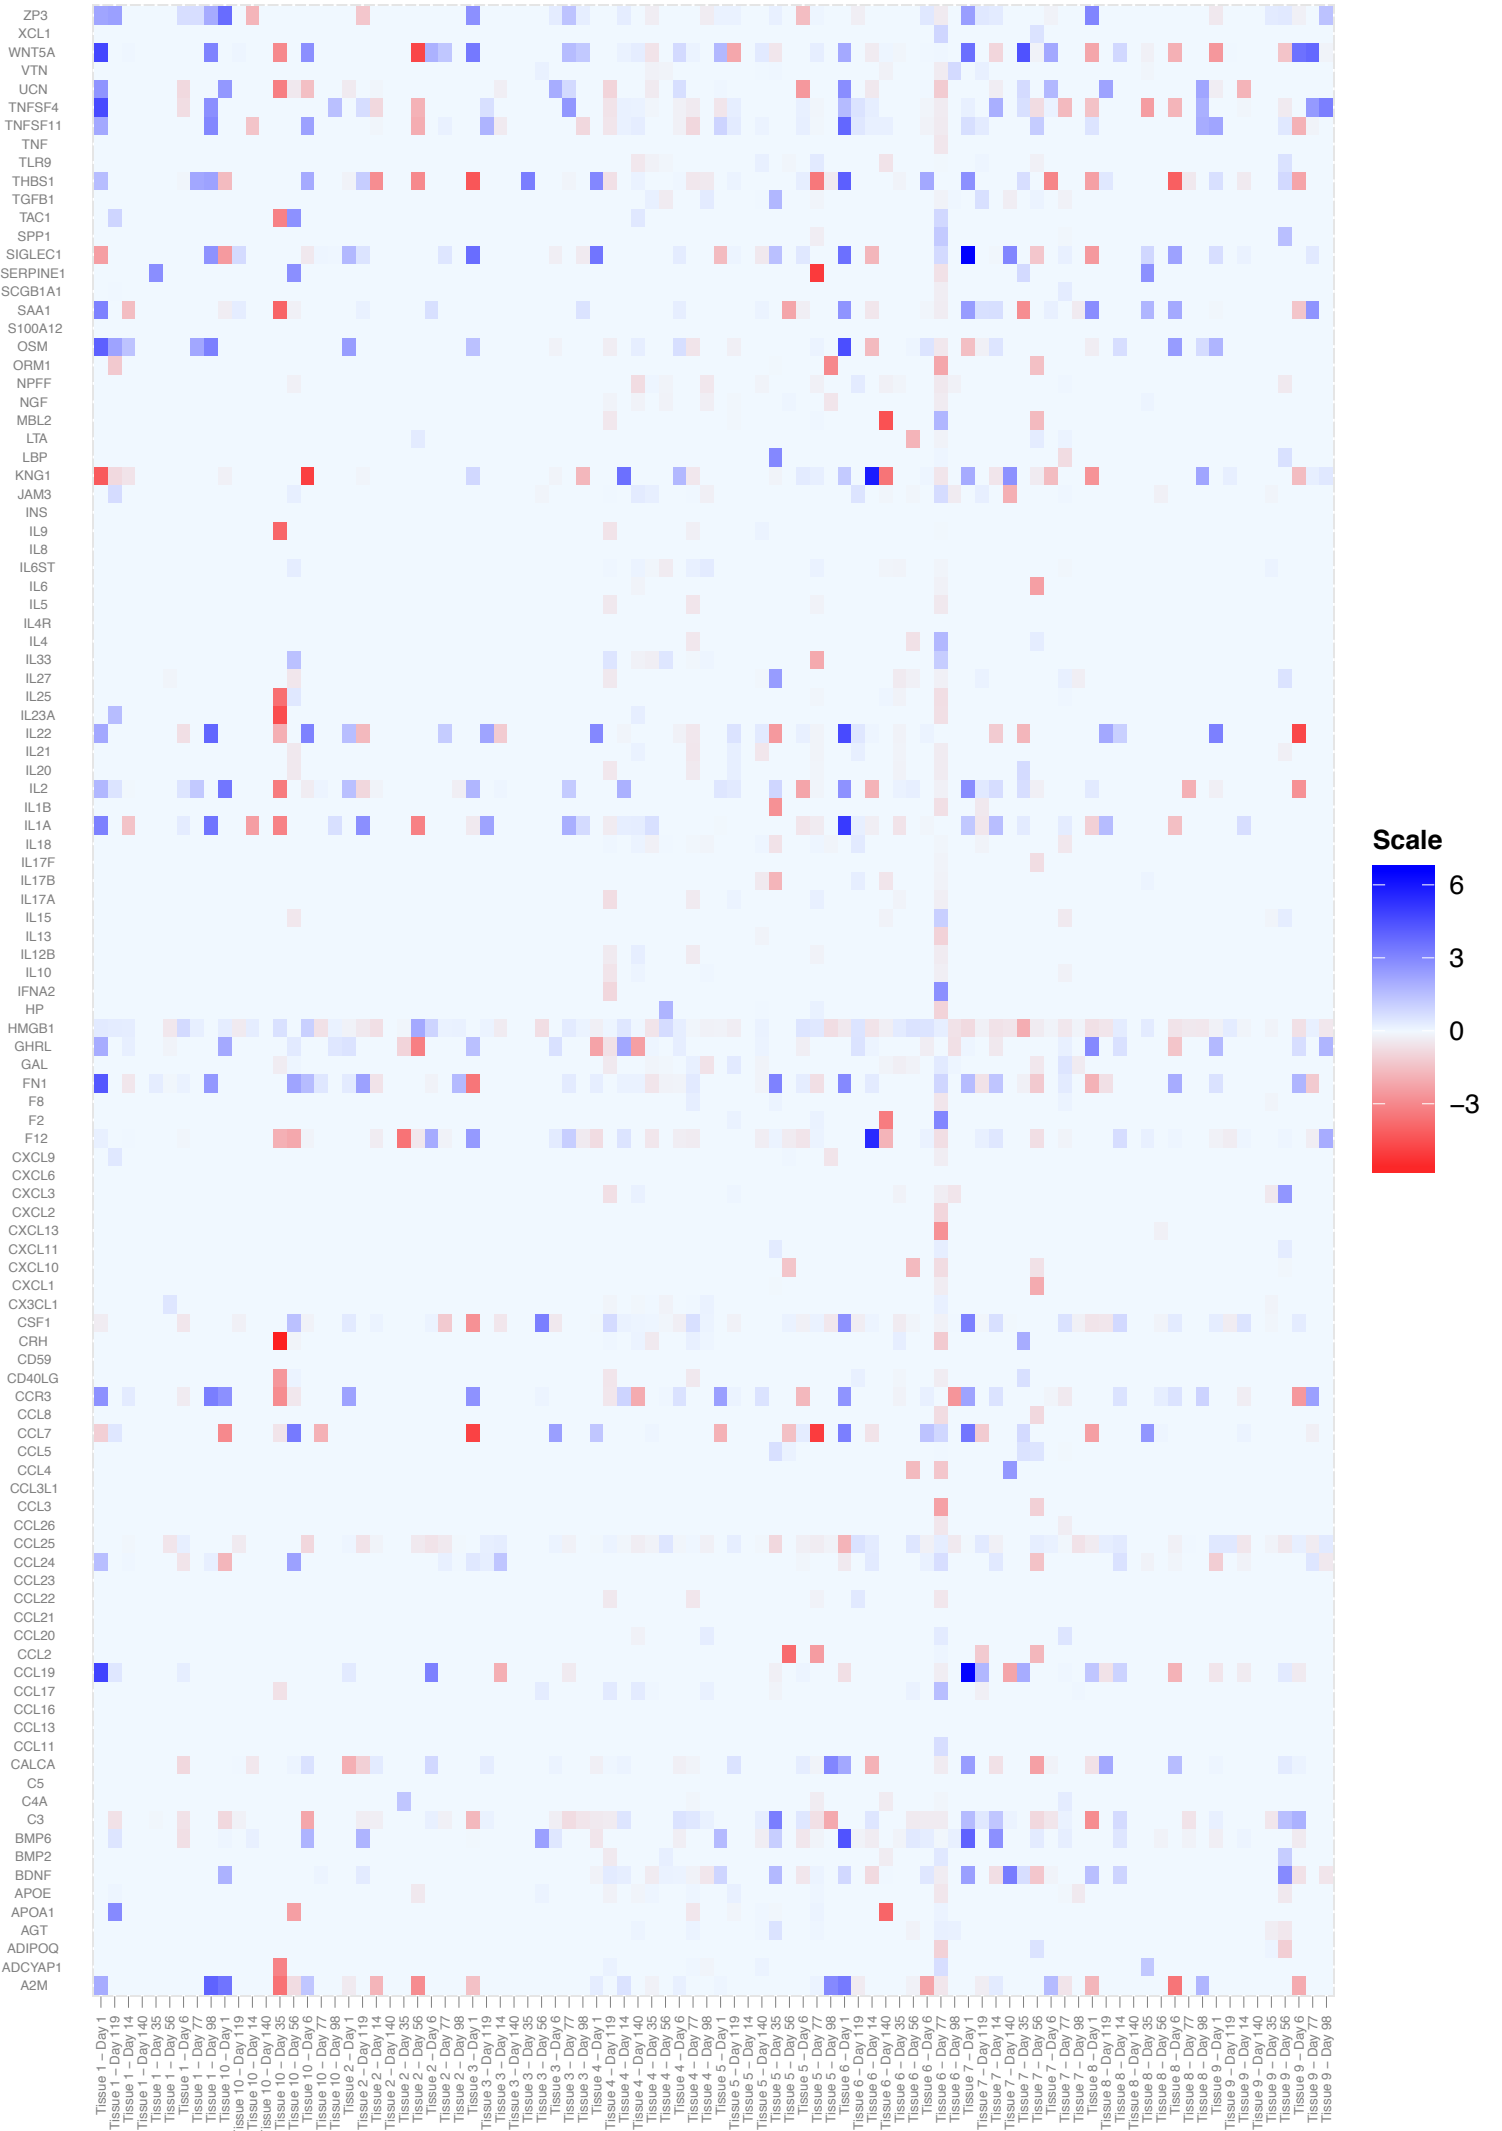





Figure S2-E : Heatmap of metabolism receptor (HFHSD)

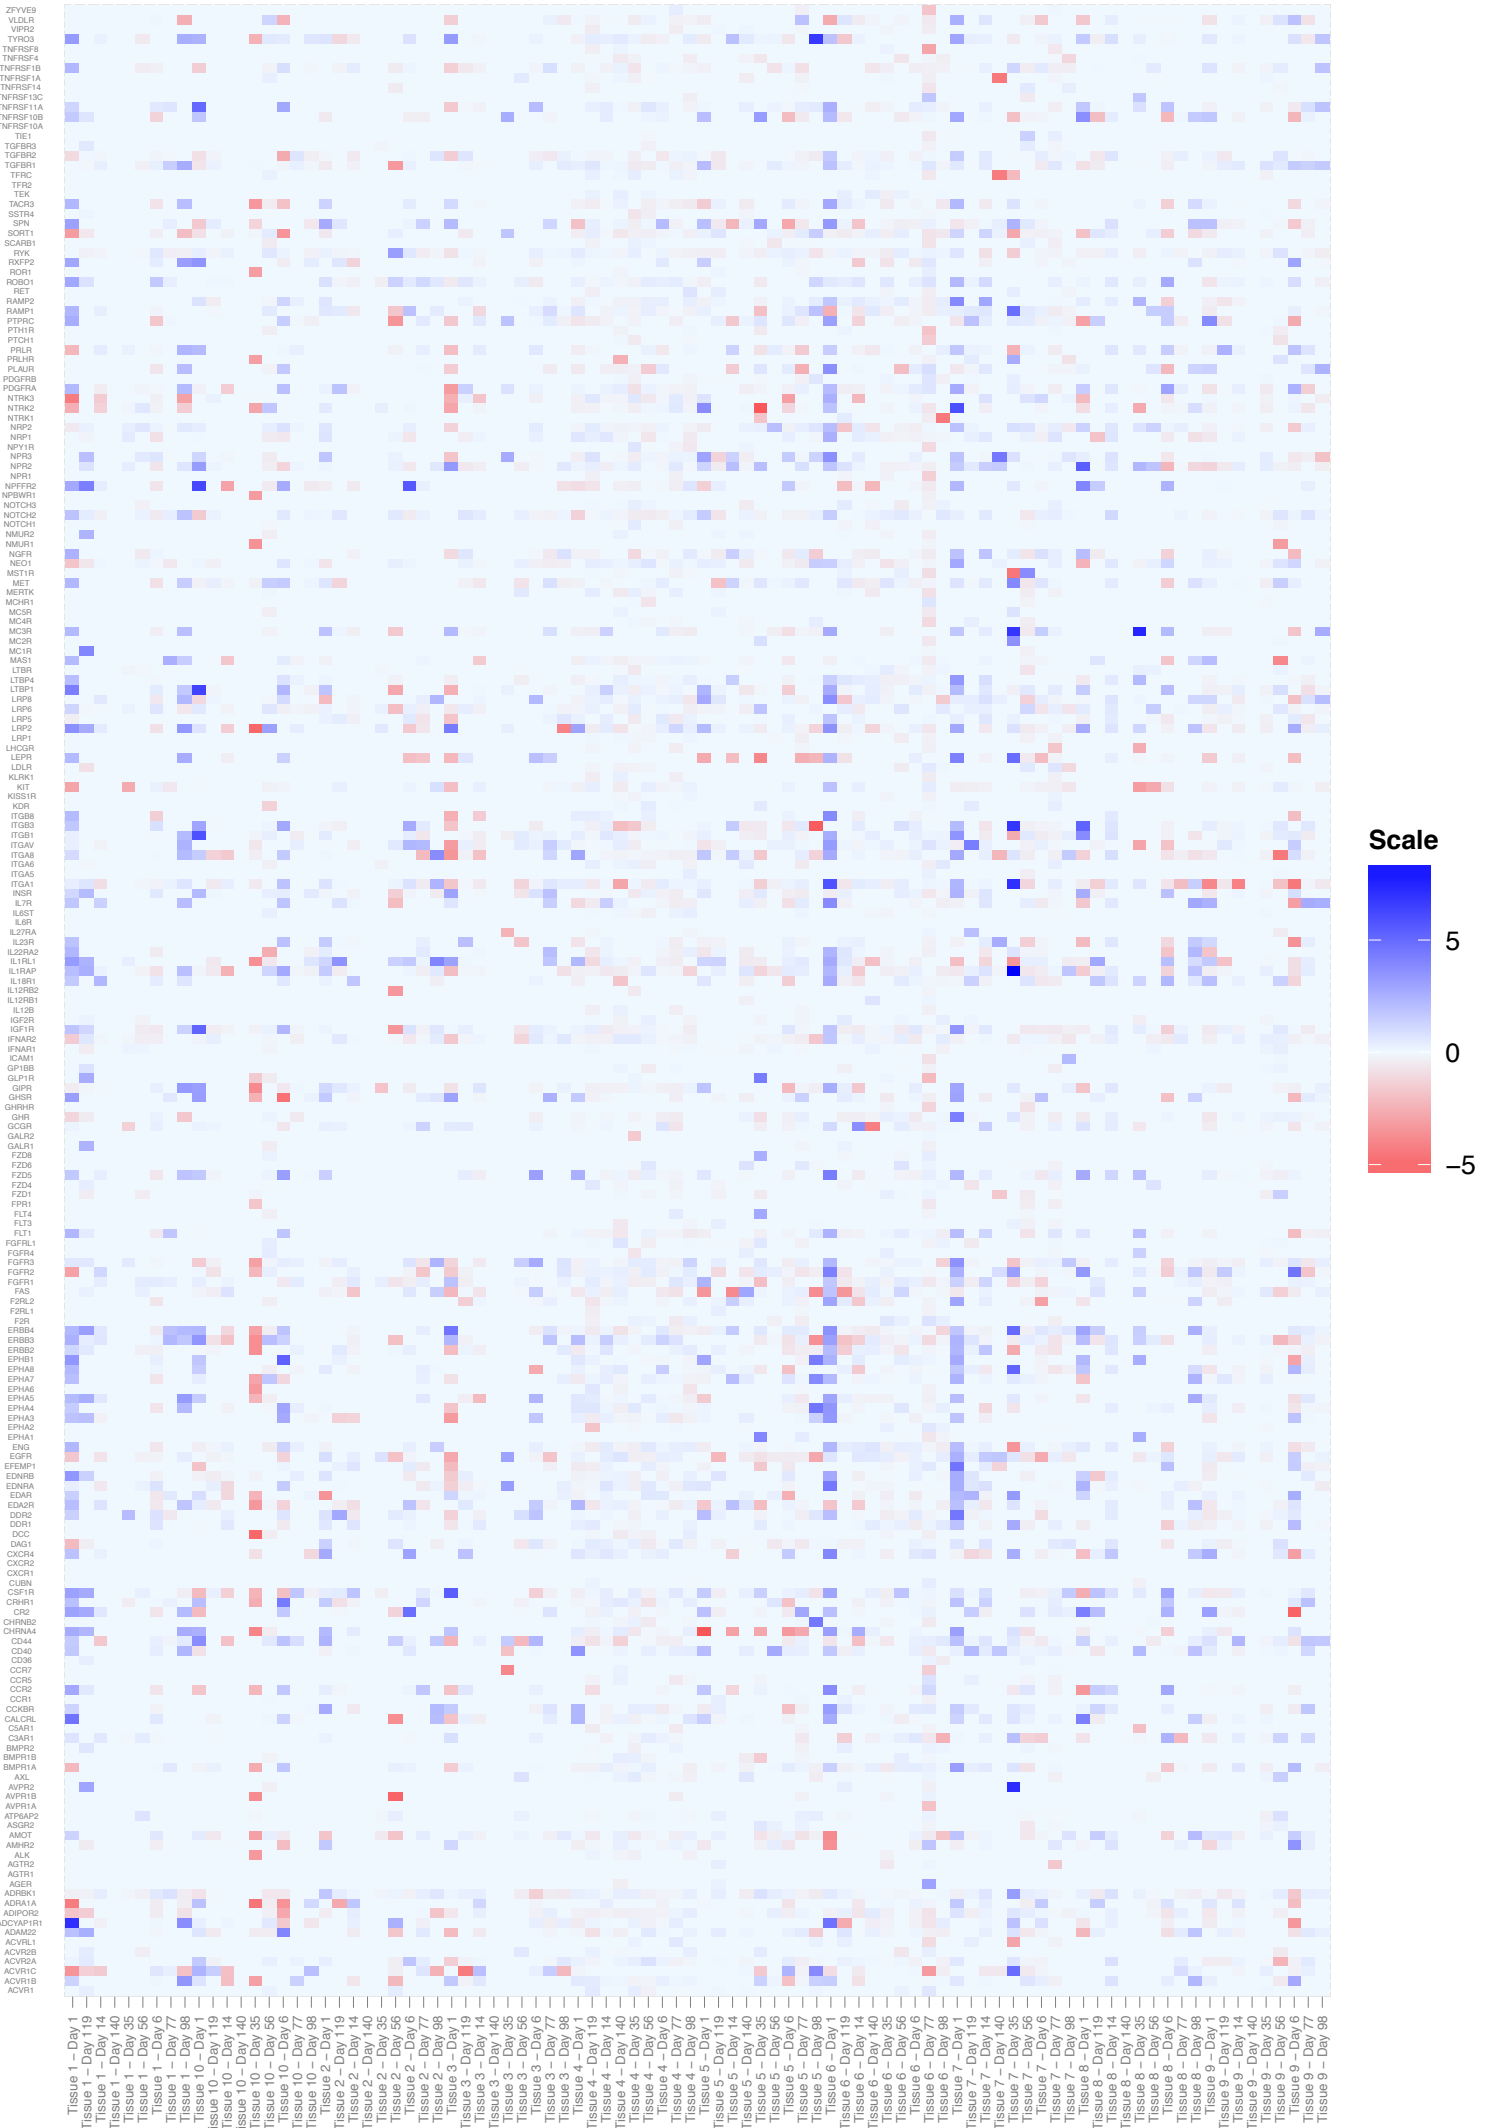





Figure S2-G : Heatmap of metabolism receptor (HFHSD+Ka1)

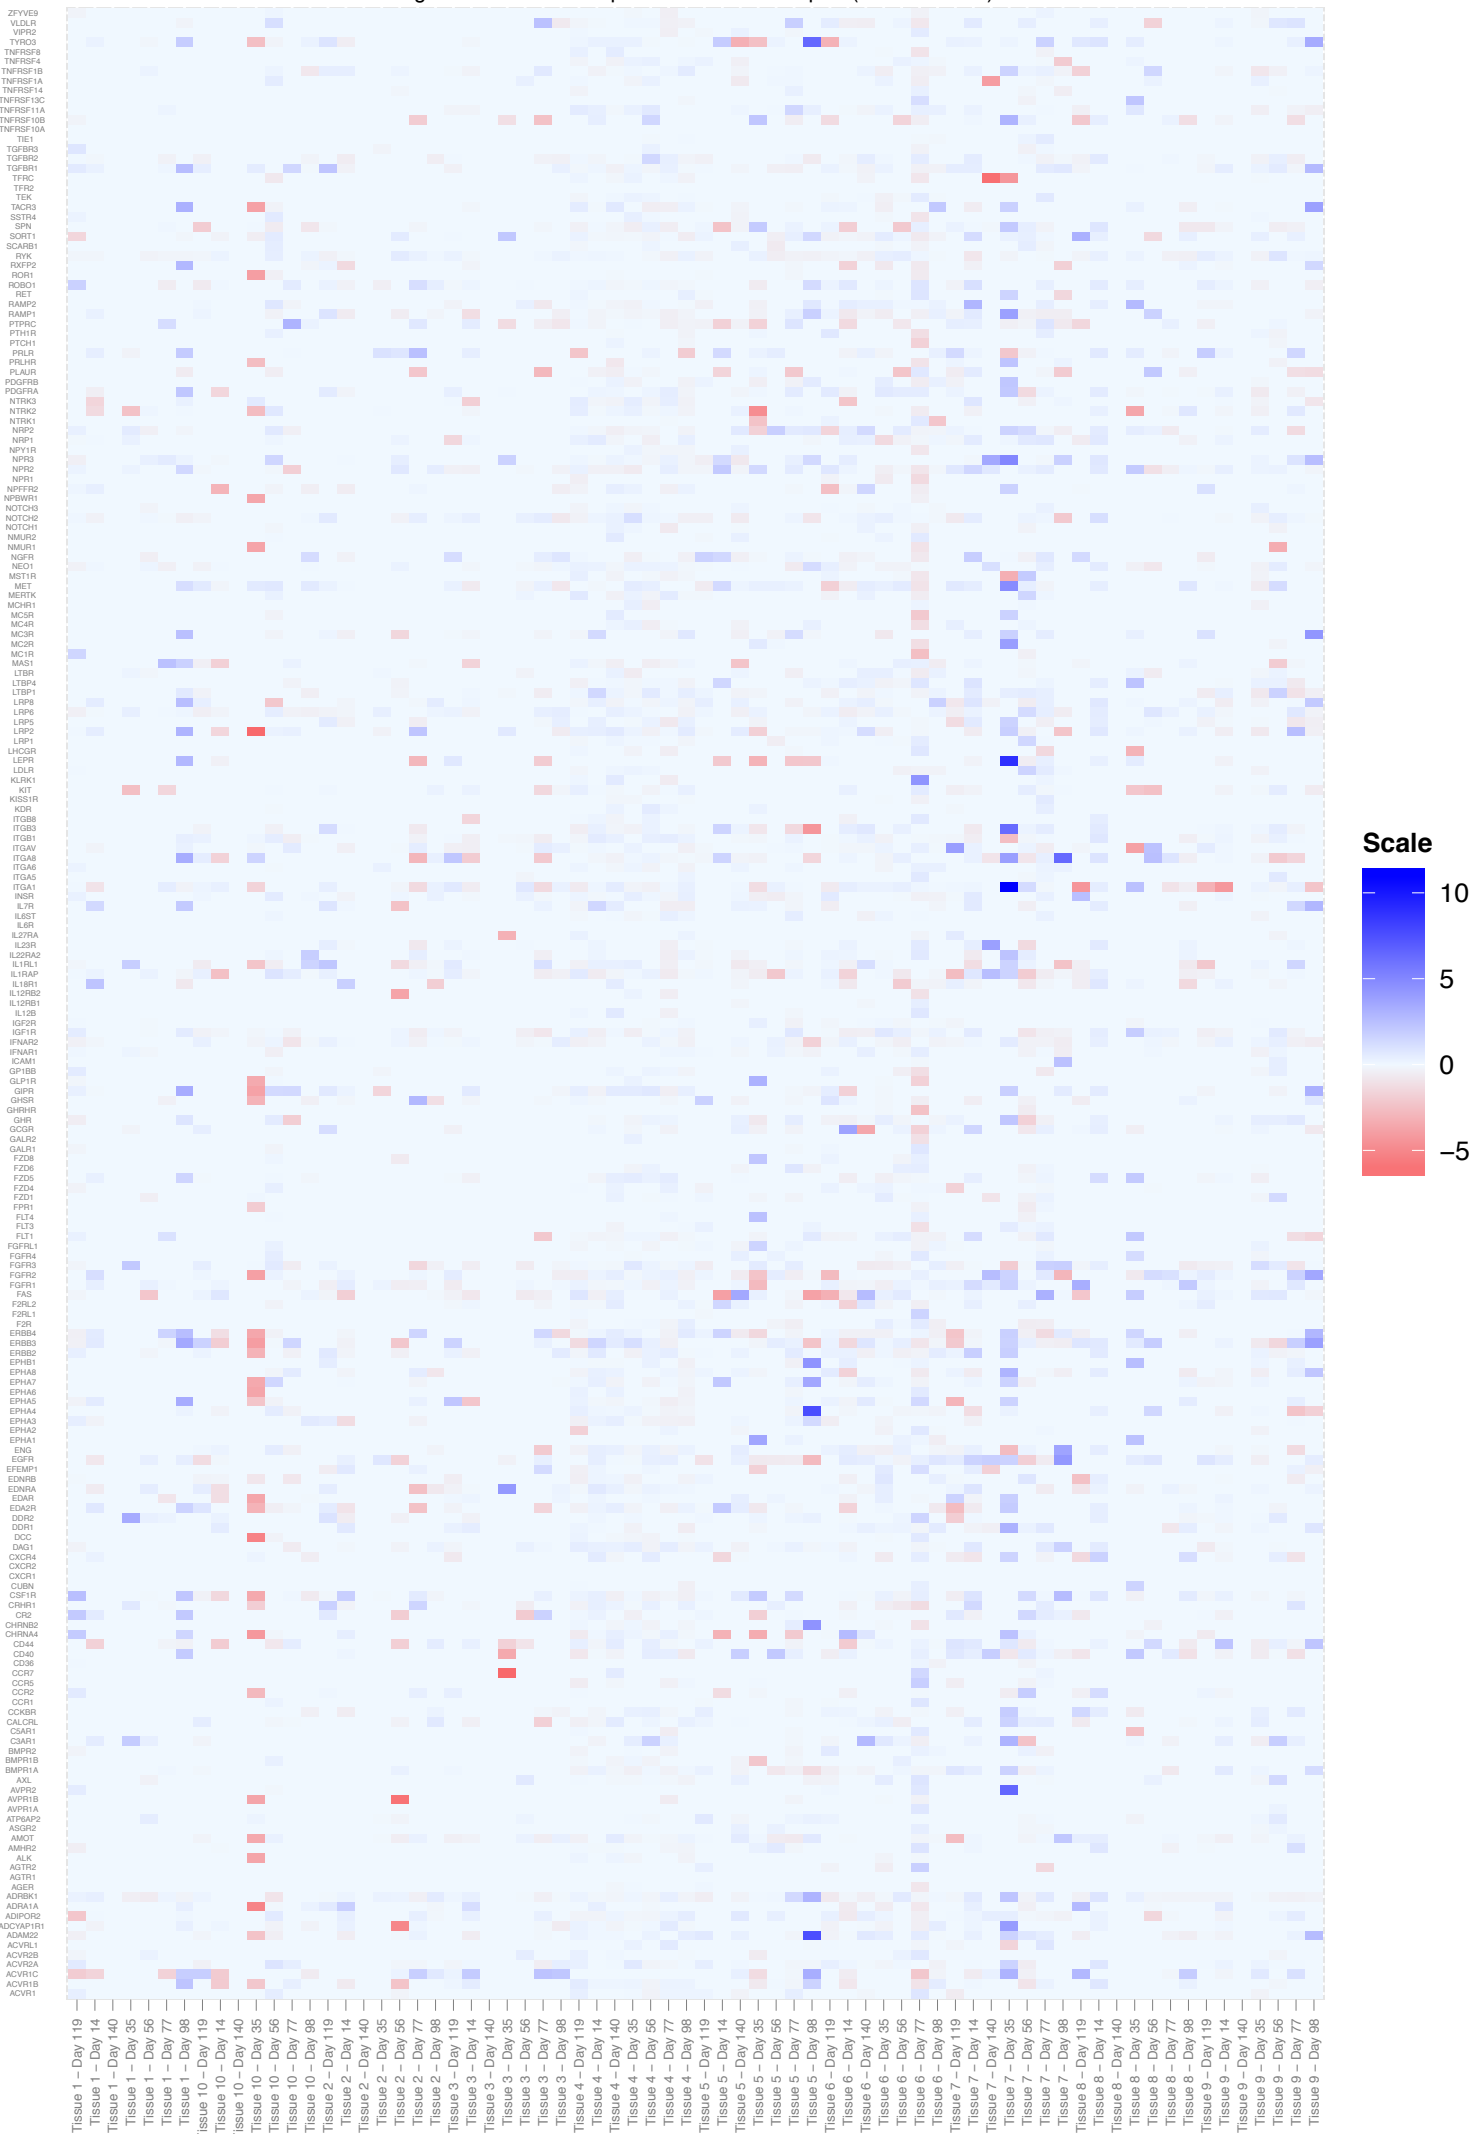

Figure S2-H : Heatmap of metabolism secretary (HFHSD+Kal1)

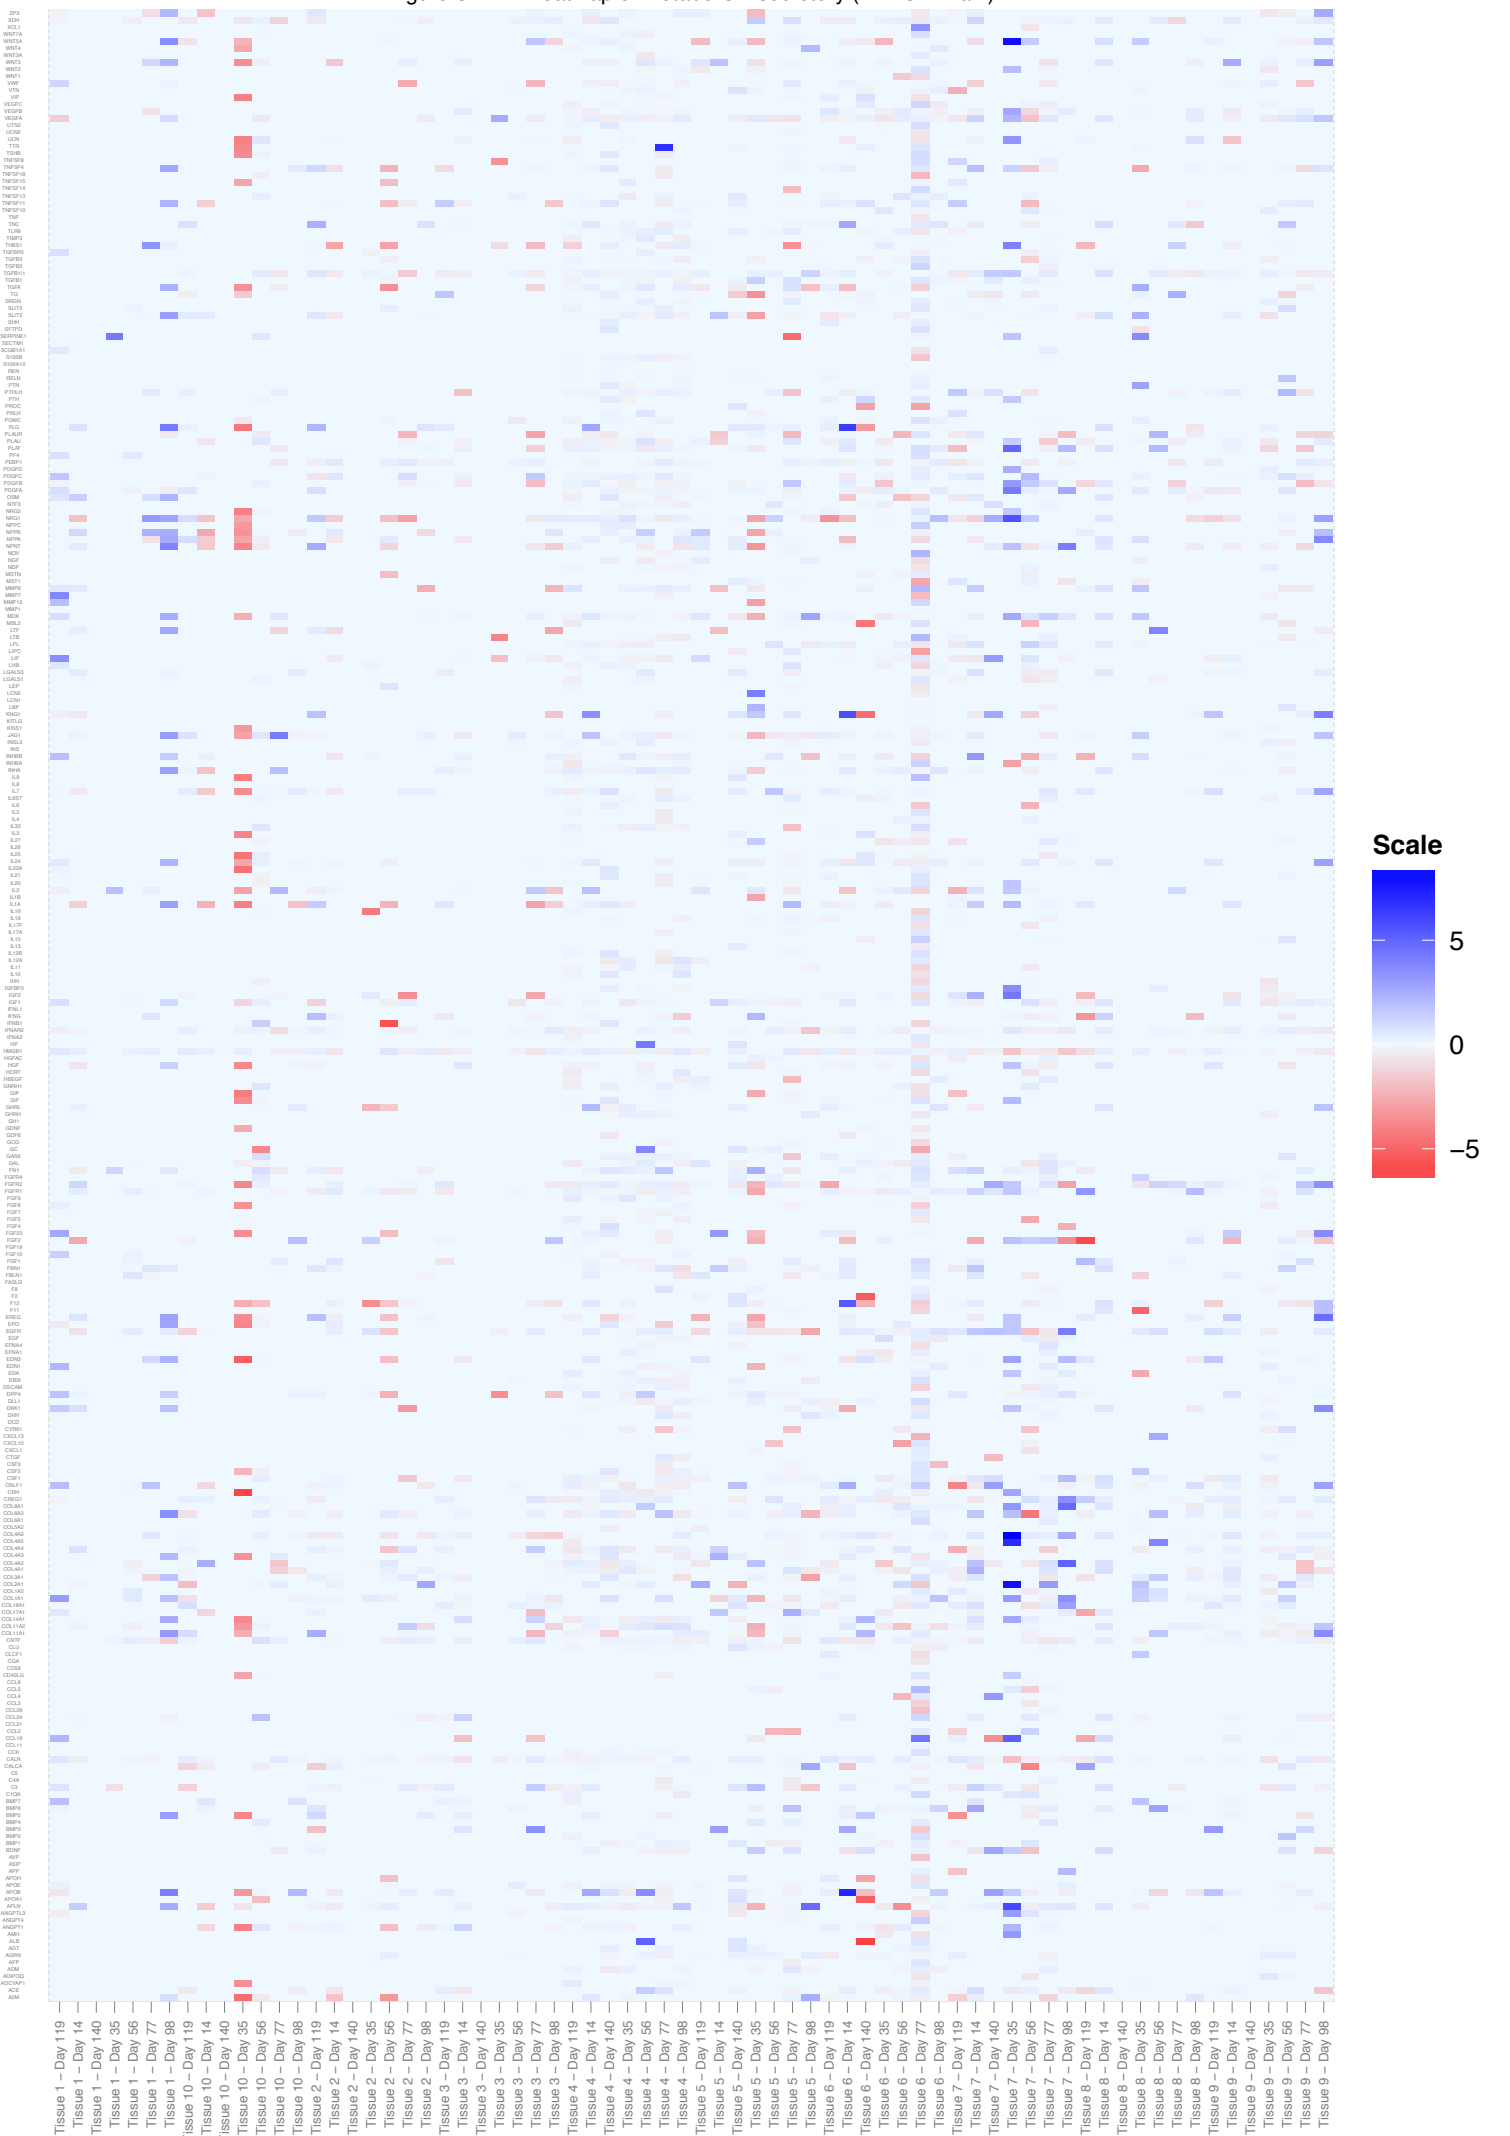

# Supplementary Figure S3A

## HFC: Sec-Down, Res-Down

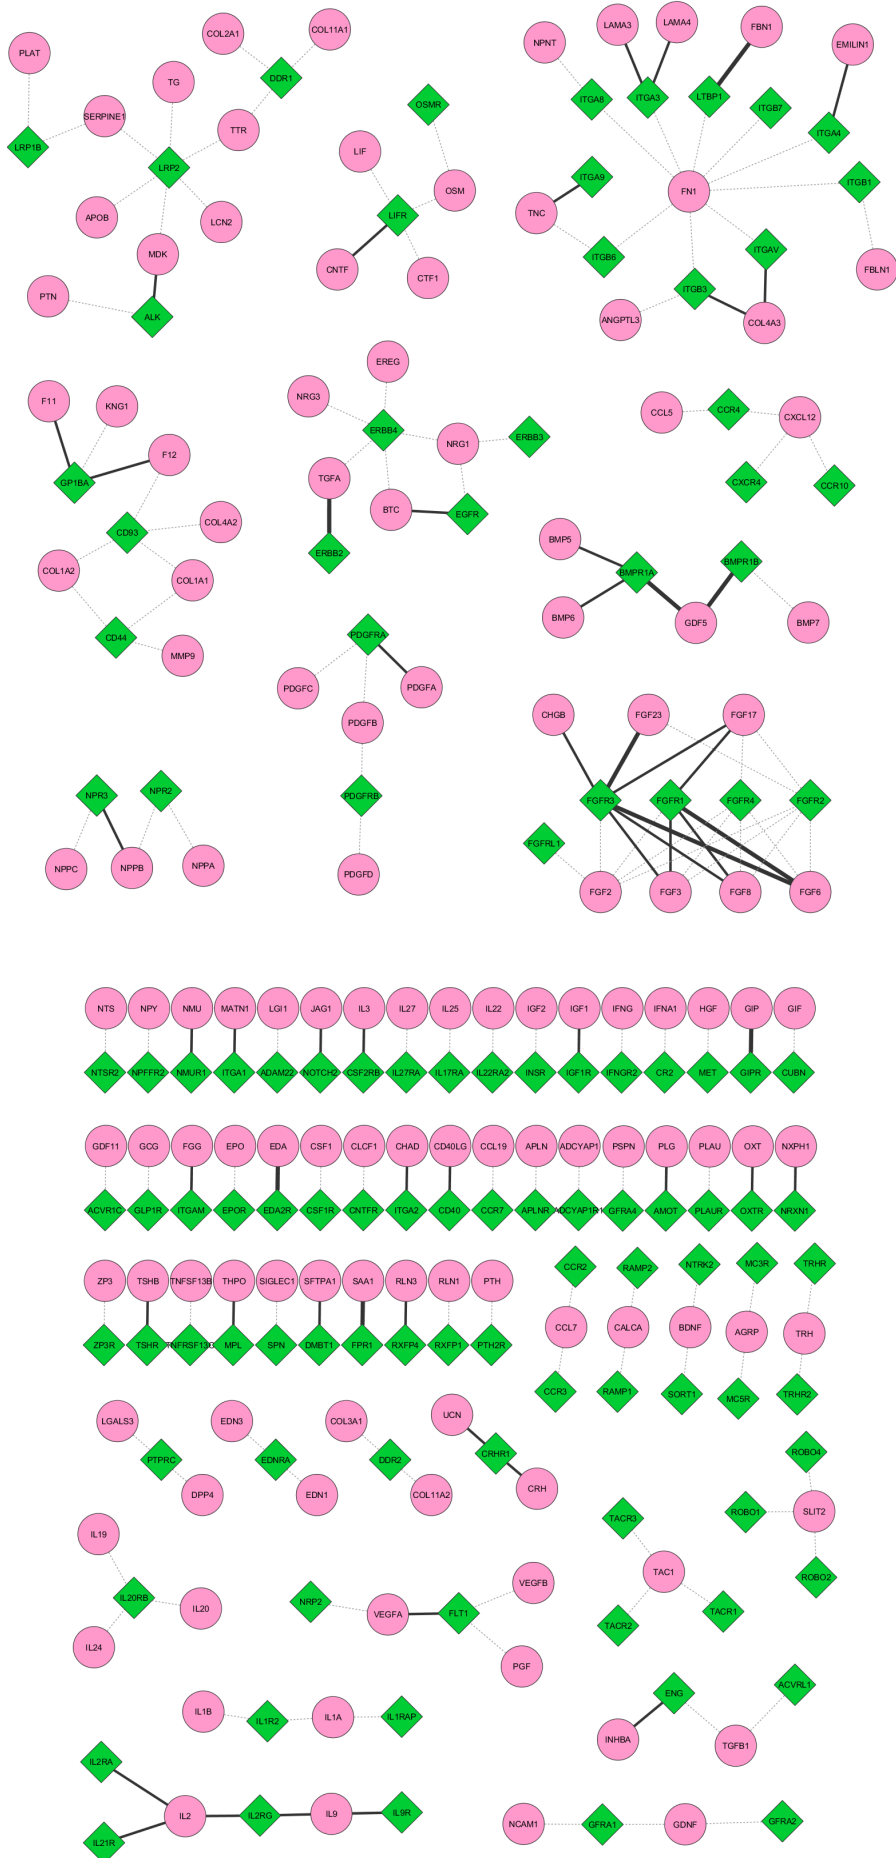

# Supplementary Figure S3B

## HFC: Sec-Down, Res-Up

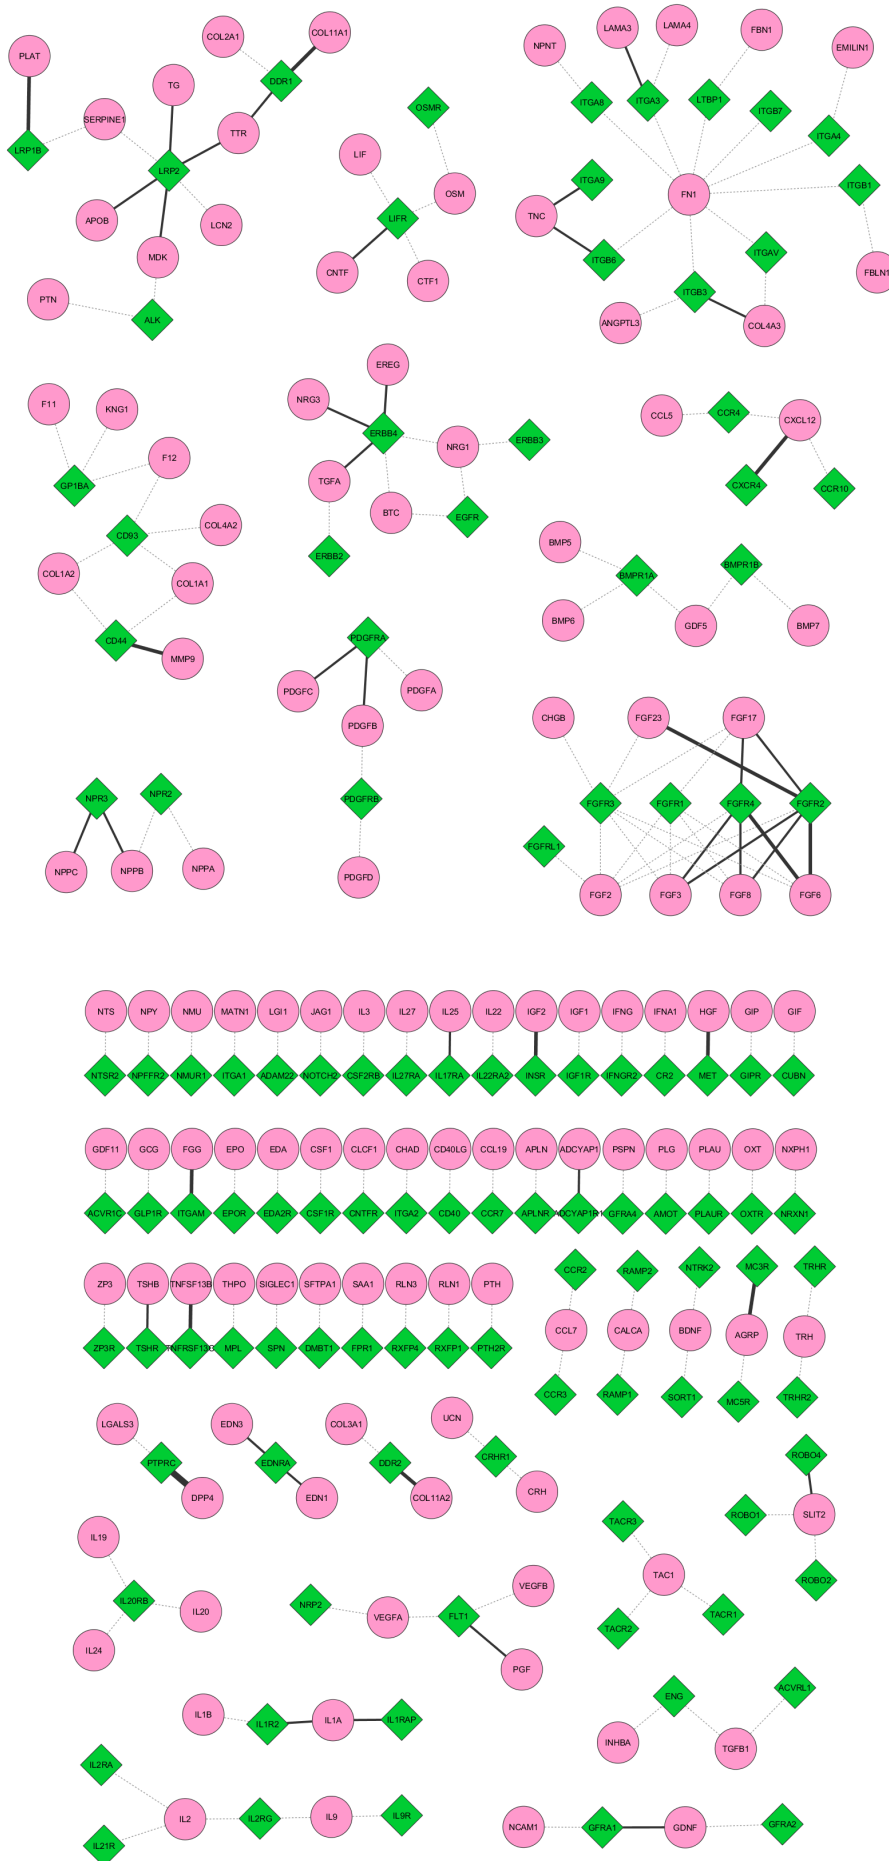



# Supplementary Figure S3D

## HFC: Sec-Up, Res-Up

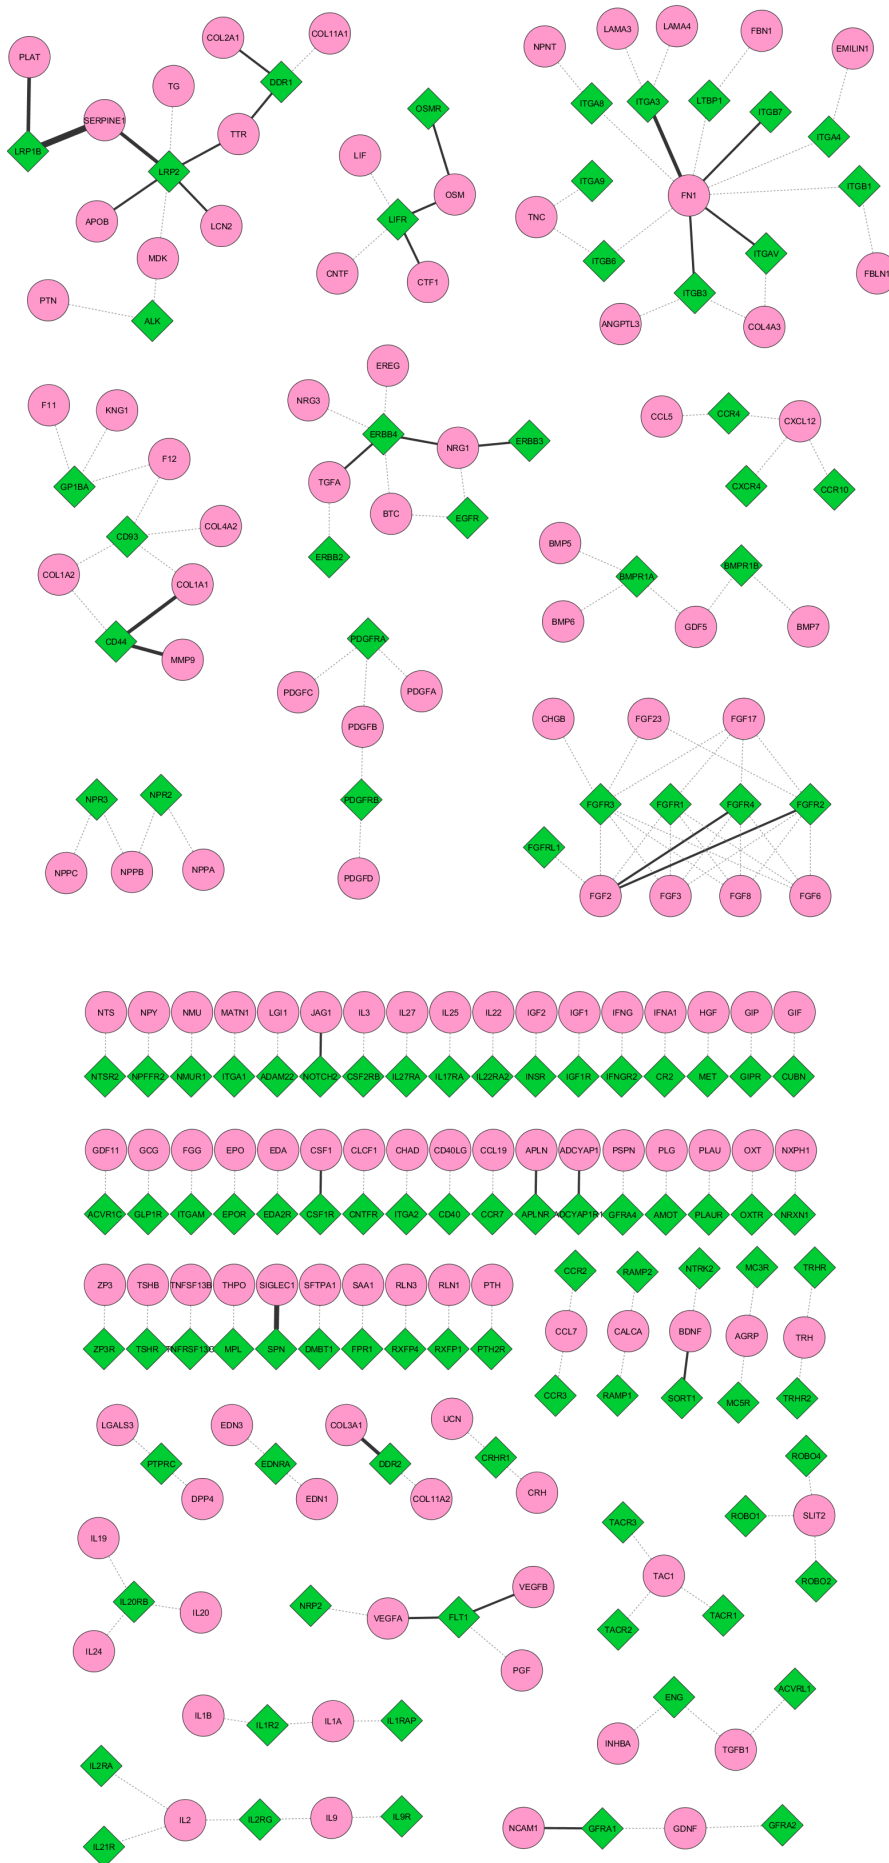

# Supplementary Figure S3E

## HFC+Kal1: Sec-Down, Res-Down

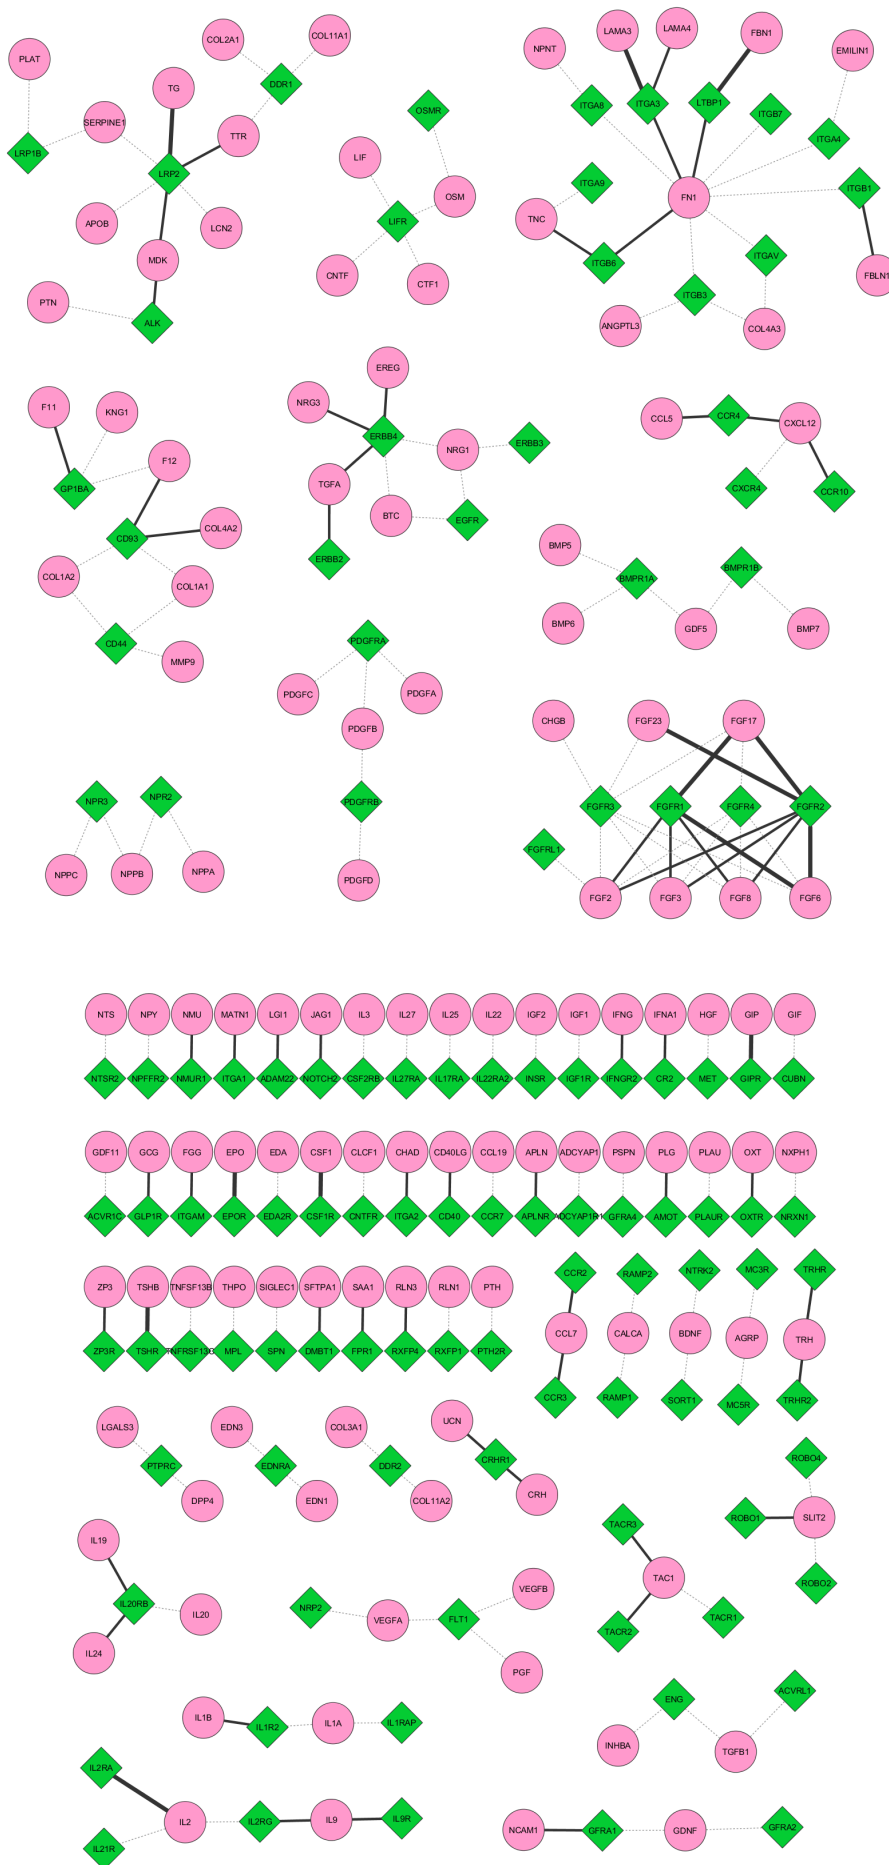





# Supplementary Figure S3G

## HFC+Kal1: Sec-Up, Res-Down

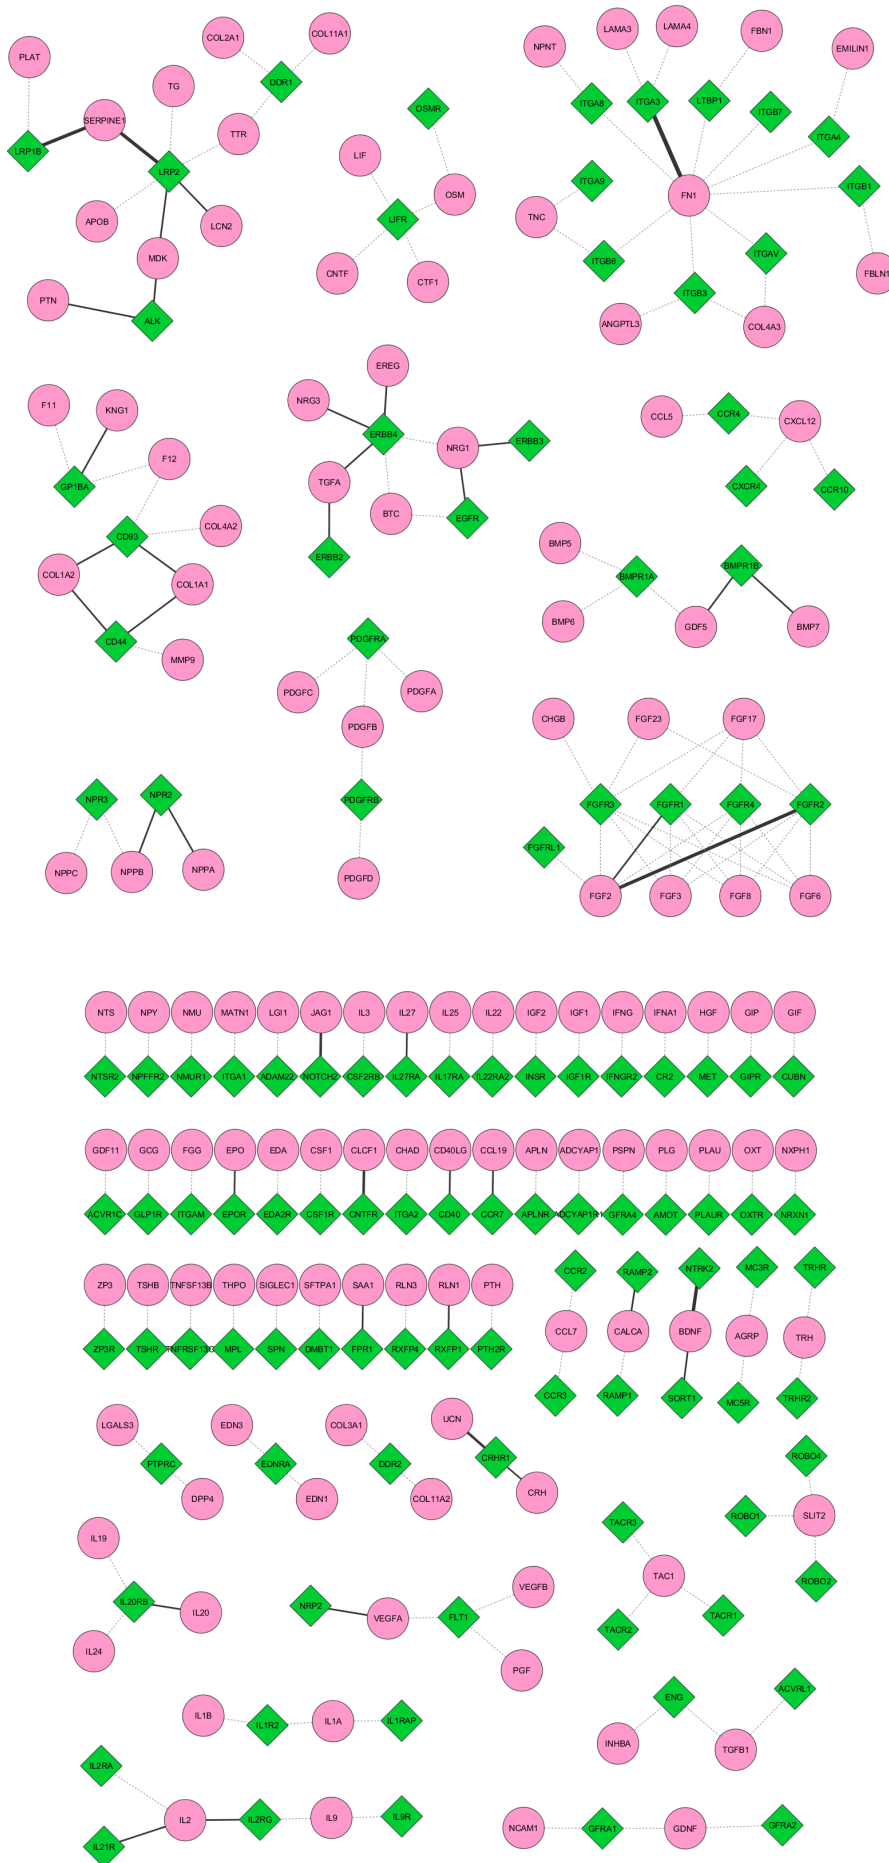



Supplementary Table S1

| Tissues                              | Time points                           | Groups                     |
|--------------------------------------|---------------------------------------|----------------------------|
| Hippocampus                          | Days 1, 6, 14, 35, 56, 77, 98 and 119 | LFC, HFHSD and HFHSD+Kal75 |
| Splenic macrophages                  | Days 1, 6, 14, 35, 56, 77, 98 and 119 | LFC, HFHSD and HFHSD+Kal75 |
| Liver                                | Days 1, 6, 14, 35, 56, 77, 98 and 119 | LFC, HFHSD and HFHSD+Kal75 |
| Skeletal Muscle                      | Days 1, 6, 14, 35, 56, 77, 98 and 119 | LFC, HFHSD and HFHSD+Kal75 |
| Brown Adipose (BA)                   | Days 1, 6, 14, 35, 56, 77, 98 and 119 | LFC, HFHSD and HFHSD+Kal75 |
| White Adipose, Epididymis (EA)       | Days 1, 6, 14, 35, 56, 77, 98 and 119 | LFC, HFHSD and HFHSD+Kal75 |
| White adipose, Subcutaneous (SA)     | Days 1, 6, 14, 35, 56, 77, 98 and 119 | LFC, HFHSD and HFHSD+Kal75 |
| Infiltrating macrophages from SVC BA | Days 1, 6, 14, 35, 56, 77, 98 and 119 | LFC, HFHSD and HFHSD+Kal75 |
| Infiltrating macrophages from SVC EA | Days 1, 6, 14, 35, 56, 77, 98 and 119 | LFC, HFHSD and HFHSD+Kal75 |
| Infiltrating macrophages from SVC SA | Days 1, 6, 14, 35, 56, 77, 98 and 119 | LFC, HFHSD and HFHSD+Kal75 |

**Supplementary Table S2****Secretory Molecules**

1100001G20Rik  
 1110058L19Rik  
 1190007I07Rik  
 1300010F03Rik  
 1500015O10Rik  
 1600002K03Rik  
 1600012H06Rik  
 1700007K09Rik  
 1700029I15Rik  
 1700034O15Rik  
 1700040I03Rik  
 1700066M21Rik  
 1810030J14Rik  
 2300002M23Rik  
 2300005B03Rik  
 2300009A05Rik  
 2310033E01Rik  
 2310044H10Rik  
 2310057J18Rik  
 2410131K14Rik  
 2610109H07Rik  
 2610507B11Rik  
 3110057O12Rik  
 4930486L24Rik  
 4930503L19Rik  
 4930572J05Rik  
 4930578C19Rik  
 4931414P19Rik  
 4933434I20Rik  
 5730469M10Rik  
 6030468B19Rik  
 8030411F24Rik  
 9030224M15Rik  
 9930032O22Rik  
 a  
 A130022J15Rik  
 A1bg  
 A2m  
 A2ML1  
 A630095E13Rik  
 A6NC86  
 A6NDD2  
 A6NF02  
 A6NG13

**Receptors**

abca1  
 abcc8  
 abcc9  
 abl1  
 ace2  
 acvr1  
 acvr1b  
 acvr1c  
 acvr2a  
 acvr2b  
 acvr1l  
 adam22  
 adcyap1r1  
 adipor1  
 adipor2  
 adora1  
 adora2a  
 adora2b  
 adora3  
 adra1a  
 adra1b  
 adra1d  
 adra2a  
 adra2b  
 adra2c  
 adrb1  
 adrb2  
 adrb3  
 adrbk1  
 af251705  
 ager  
 agtr1  
 agtr1a  
 agtr1b  
 agtr2  
 agtrap  
 ahr  
 alk  
 amfr  
 amhr2  
 amot  
 anpep  
 antxr1  
 antxr2

**Interactions**

| <b>Secretory</b> | <b>Receptor</b> |
|------------------|-----------------|
| STX1A            | ABCC9           |
| AGT              | ACE2            |
| GHRL             | ACE2            |
| NTS              | ACE2            |
| BMP2             | ACVR1           |
| BMP7             | ACVR1           |
| ENG              | ACVR1           |
| GDF5             | ACVR1           |
| INHBA            | ACVR1           |
| INHBB            | ACVR1           |
| INHBC            | ACVR1           |
| PLEK             | ACVR1           |
| CFC1             | ACVR1B          |
| GDF11            | ACVR1B          |
| INHBA            | ACVR1B          |
| INHBB            | ACVR1B          |
| INHBC            | ACVR1B          |
| TDGF1            | ACVR1B          |
| GDF11            | ACVR1C          |
| INHBB            | ACVR1C          |
| TDGF1            | ACVR1C          |
| BMP2             | ACVR2A          |
| BMP3             | ACVR2A          |
| BMP6             | ACVR2A          |
| BMP7             | ACVR2A          |
| ENG              | ACVR2A          |
| ERBB2IP          | ACVR2A          |
| GDF5             | ACVR2A          |
| GDF9             | ACVR2A          |
| INHA             | ACVR2A          |
| INHBA            | ACVR2A          |
| INHBB            | ACVR2A          |
| INHBC            | ACVR2A          |
| TGFBR3           | ACVR2A          |
| BMP2             | ACVR2B          |
| BMP3             | ACVR2B          |
| BMP6             | ACVR2B          |
| BMP7             | ACVR2B          |
| ENG              | ACVR2B          |
| ERBB2IP          | ACVR2B          |
| GDF11            | ACVR2B          |
| GDF5             | ACVR2B          |
| INHBA            | ACVR2B          |



|          |          |          |         |
|----------|----------|----------|---------|
| Adamts4  | calcr    | MEP1B    | ALK     |
| Adamts5  | calcr1   | PTN      | ALK     |
| ADAMTS6  | casr     | RAB35    | ALK     |
| Adamts7  | ccbp2    | GPI      | AMFR    |
| Adamts8  | cckar    | AMH      | AMHR2   |
| Adamts9  | cckbr    | PLG      | AMOT    |
| Adamts11 | ccr1     | FCGBP    | ANPEP   |
| Adamts12 | ccr10    | MEP1B    | ANPEP   |
| ADAMTSL3 | ccr11    | COL4A2   | ANTXR2  |
| Adamts14 | ccr2     | COL4A3   | ANTXR2  |
| ADAMTSL5 | ccr3     | COL4A4   | ANTXR2  |
| Adck1    | ccr4     | APLN     | APLNR   |
| Adcyap1  | ccr5     | APOL2    | AR      |
| Adipoq   | ccr6     | CALR     | AR      |
| Adm      | ccr7     | CASP1    | AR      |
| Adm2     | ccr8     | EGFR     | AR      |
| ADM5     | ccr9     | FLNA     | AR      |
| Adnp     | ccr11    | GSN      | AR      |
| Adpgk    | ccr12    | HMGB1    | AR      |
| Aebp1    | cd14     | HMGB2    | AR      |
| AER61    | cd160    | HSP90AA1 | AR      |
| Afm      | cd163    | IDE      | AR      |
| Afp      | cd16311  | IL6ST    | AR      |
| AGER     | cd180    | KLK3     | AR      |
| Aggf1    | cd1d     | TGFB1    | AR      |
| AGO61    | cd2      | TGFB1I1  | AR      |
| Agr2     | cd200r1  | HSP90AA1 | ARNTL   |
| Agr3     | cd200r1l | HSP90AA1 | ASGR1   |
| Agrn     | cd200r2  | TG       | ASGR1   |
| Agrp     | cd200r3  | F8       | ASGR2   |
| Agt      | cd200r4  | REN      | ATP6AP2 |
| Ahsg     | cd209    | ASIP     | ATRN    |
| AI413582 | cd209a   | AVP      | AVPR1A  |
| AI462493 | cd209b   | AVP      | AVPR1B  |
| AIMP1    | cd209c   | AVP      | AVPR2   |
| AKR1B1   | cd209d   | C1QTNF1  | AVPR2   |
| Akr1b3   | cd209e   | GNAS     | AVPR2   |
| Alad     | cd22     | GAS6     | AXL     |
| Alb      | cd226    | IL15RA   | AXL     |
| Aldoa    | cd244    | TLN1     | BAI2    |
| Alkbh7   | cd247    | LAMA5    | BCAM    |
| Alpl     | cd27     | APP      | BCAP31  |
| Ambn     | cd274    | CASP1    | BCAP31  |
| Ambp     | cd28     | MEP1A    | BDKRB1  |
| Amelx    | cd300a   | ACE      | BDKRB2  |
| AMELY    | cd300c   | BMPER    | BMP2    |
| Amh      | cd300e   | CHRD2    | BMP2    |

|         |         |
|---------|---------|
| Amtn    | cd300lb |
| Amy1    | cd300ld |
| AMY1A   | cd300lf |
| AMY2A   | cd300lg |
| Amy2a5  | cd300lh |
| AMY2B   | cd302   |
| Ang     | cd33    |
| Ang4    | cd36    |
| Angpt1  | cd38    |
| Angpt2  | cd3d    |
| Angpt4  | cd3e    |
| Angptl1 | cd3g    |
| Angptl2 | cd4     |
| Angptl3 | cd40    |
| Angptl4 | cd44    |
| ANGPTL5 | cd46    |
| Angptl6 | cd47    |
| Angptl7 | cd48    |
| ANTXR2  | cd5     |
| Anxa1   | cd55    |
| Anxa2   | cd5l    |
| ANXA2P2 | cd6     |
| Anxa5   | cd69    |
| Aoah    | cd7     |
| Aoc3    | cd72    |
| Apcs    | cd74    |
| Apln    | cd79a   |
| APLP1   | cd79b   |
| Apoa1   | cd80    |
| Apoa1bp | cd84    |
| Apoa2   | cd86    |
| Apoa4   | cd8a    |
| Apoa5   | cd8b    |
| Apob    | cd93    |
| APOBR   | cd97    |
| Apoc1   | cdhr1   |
| Apoc2   | ceacam1 |
| Apoc3   | ceacam2 |
| Apoc4   | celsr1  |
| Apod    | celsr2  |
| Apoe    | celsr3  |
| Apof    | cfi     |
| Apoh    | chrn1   |
| APOL1   | chrn2   |
| APOL2   | chrn3   |
| APOL3   | chrn4   |
| APOL4   | chrn5   |

|           |          |
|-----------|----------|
| COL2A1    | BMP2     |
| ENG       | BMP2     |
| GREM2     | BMP2     |
| MGP       | BMP2     |
| NOG       | BMP2     |
| SOSTDC1   | BMP2     |
| TGFB1     | BMP2     |
| TGFB2     | BMP2     |
| BMP2      | BMPR1A   |
| BMP4      | BMPR1A   |
| BMP5      | BMPR1A   |
| BMP6      | BMPR1A   |
| BMP7      | BMPR1A   |
| GDF5      | BMPR1A   |
| GDF6      | BMPR1A   |
| GDF9      | BMPR1A   |
| BMP15     | BMPR1B   |
| BMP2      | BMPR1B   |
| BMP4      | BMPR1B   |
| BMP6      | BMPR1B   |
| BMP7      | BMPR1B   |
| GDF5      | BMPR1B   |
| GDF6      | BMPR1B   |
| GDF9      | BMPR1B   |
| ARSA      | BMPR2    |
| BMP2      | BMPR2    |
| BMP4      | BMPR2    |
| BMP6      | BMPR2    |
| BMP7      | BMPR2    |
| C4BPA     | BMPR2    |
| GDF5      | BMPR2    |
| GDF6      | BMPR2    |
| GDF9      | BMPR2    |
| SERPINA3K | BMPR2    |
| PLIN2     | BTN1A1   |
| XDH       | BTN1A1   |
| PLSCR1    | C10ORF54 |
| C3        | C3AR1    |
| C4A       | C3AR1    |
| C5        | C5AR1    |
| FLNA      | CALCR    |
| MBL2      | CALCR    |
| RAMP1     | CALCR    |
| THBS1     | CALCR    |
| ADM       | CALCRL   |
| CALCA     | CALCRL   |
| RAMP1     | CALCRL   |

|           |          |        |       |
|-----------|----------|--------|-------|
| APOL5     | chrna1   | FLNA   | CASR  |
| APOL6     | chrna10  | CCL11  | CCBP2 |
| APOLD1    | chrna2   | CCL12  | CCBP2 |
| Apom      | chrna3   | CCL13  | CCBP2 |
| Apon      | chrna4   | CCL14  | CCBP2 |
| APOO      | chrna5   | CCL19  | CCBP2 |
| Apool     | chrna6   | CCL2   | CCBP2 |
| APP       | chrna7   | CCL21  | CCBP2 |
| Aqp1      | chrna7-2 | CCL25  | CCBP2 |
| Areg      | chrna9   | CCL27  | CCBP2 |
| Arg1      | chrnb1   | CCL28  | CCBP2 |
| Arsa      | chrnb2   | CCL3   | CCBP2 |
| ARSF      | chrnb3   | CCL4   | CCBP2 |
| Arsg      | chrnb4   | CCL5   | CCBP2 |
| Arsi      | chrnd    | CCL7   | CCBP2 |
| Arsj      | chrne    | CCL8   | CCBP2 |
| Arsk      | chrng    | CCR3   | CCBP2 |
| Art5      | cldn3    | CCK    | CCKAR |
| Artn      | cldn4    | CCK    | CCKBR |
| ASIP      | cllec12a | GAST   | CCKBR |
| Aspn      | cllec12b | CCL1   | CCR1  |
| Atg4c     | cllec17a | CCL14  | CCR1  |
| ATRNL     | cllec18a | CCL15  | CCR1  |
| AU021092  | cllec1a  | CCL16  | CCR1  |
| Avp       | cllec1b  | CCL2   | CCR1  |
| AY074887  | cllec2a  | CCL23  | CCR1  |
| Azgp1     | cllec2d  | CCL26  | CCR1  |
| AZU1      | cllec2g  | CCL3   | CCR1  |
| B2m       | cllec2h  | CCL3L1 | CCR1  |
| B4E171    | cllec2i  | CCL4   | CCR1  |
| B4galt1   | cllec4a  | CCL5   | CCR1  |
| BAGE      | cllec4a1 | CCL7   | CCR1  |
| BAGE2     | cllec4a3 | CCL8   | CCR1  |
| BAGE3     | cllec4a4 | CCL19  | CCR10 |
| BAGE4     | cllec4b1 | CCL2   | CCR10 |
| BAGE5     | cllec4b2 | CCL21  | CCR10 |
| BC028528  | cllec4d  | CCL25  | CCR10 |
| BC048546  | cllec4e  | CCL27  | CCR10 |
| Bcan      | cllec4f  | CCL28  | CCR10 |
| Bche      | cllec4m  | CCL7   | CCR10 |
| Bdnf      | cllec5a  | CXCL12 | CCR10 |
| Bglap     | cllec7a  | CXCL13 | CCR10 |
| Bglap2    | cllec9a  | CCL11  | CCR2  |
| Bglap-rs1 | cmklr1   | CCL13  | CCR2  |
| Bgn       | cnr1     | CCL16  | CCR2  |
| Bicd1     | cnr2     | CCL2   | CCR2  |
| Bmp1      | cntfr    | CCL7   | CCR2  |



|           |         |          |      |
|-----------|---------|----------|------|
| Bmp10     | cntnap1 | CCL8     | CCR2 |
| Bmp15     | colec12 | CCL11    | CCR3 |
| Bmp2      | corin   | CCL13    | CCR3 |
| Bmp3      | cr1     | CCL14    | CCR3 |
| Bmp4      | cr1l    | CCL15    | CCR3 |
| Bmp5      | cr2     | CCL2     | CCR3 |
| Bmp6      | crcp    | CCL24    | CCR3 |
| Bmp7      | crhr1   | CCL26    | CCR3 |
| Bmp8a     | crhr1l  | CCL28    | CCR3 |
| Bmp8b     | crhr2   | CCL3     | CCR3 |
| Bmper     | crim1   | CCL3L1   | CCR3 |
| Bola1     | crlf1   | CCL4     | CCR3 |
| Bola3     | crlf2   | CCL5     | CCR3 |
| Bpi       | crlf3   | CCL7     | CCR3 |
| BPIFA1    | cry1    | CCL8     | CCR3 |
| BPIFA2    | cry2    | CXCL10   | CCR3 |
| Bpifa2e   | csf1r   | CXCL11   | CCR3 |
| Bpifa3    | csf2ra  | CXCL9    | CCR3 |
| Bpifa5    | csf2rb  | CCL17    | CCR4 |
| Bpifb1    | csf2rb2 | CCL22    | CCR4 |
| Bpifb2    | csf3r   | CCL3     | CCR4 |
| Bpifb3    | cubn    | CCL5     | CCR4 |
| Bpifb4    | cul5    | CXCL12   | CCR4 |
| Bpifb6    | cx3cr1  | AFP      | CCR5 |
| Bpifc     | cxadr   | CCL11    | CCR5 |
| BRPF3     | cxcl16  | CCL13    | CCR5 |
| Bsph1     | cxcr1   | CCL14    | CCR5 |
| Btbd17    | cxcr2   | CCL16    | CCR5 |
| Btc       | cxcr3   | CCL2     | CCR5 |
| Btd       | cxcr4   | CCL3     | CCR5 |
| BTN1A1    | cxcr5   | CCL3L1   | CCR5 |
| C10orf25  | cxcr6   | CCL4     | CCR5 |
| C10orf31  | cxcr7   | CCL5     | CCR5 |
| C10orf58  | cysltr1 | CCL7     | CCR5 |
| C10orf99  | cysltr2 | CCL8     | CCR5 |
| C11orf44  | cyth3   | CCR3     | CCR5 |
| C11orf45  | dag1    | ORM1     | CCR5 |
| C11orf83  | darc    | CCL20    | CCR6 |
| C11orf94  | dbi     | DEFB1    | CCR6 |
| C12orf28  | dcc     | DEFB103A | CCR6 |
| C12orf39  | ddr1    | CCL19    | CCR7 |
| C12orf49  | ddr2    | CCL21    | CCR7 |
| C12orf73  | dear1   | CCL1     | CCR8 |
| C14orf144 | derl1   | CCL16    | CCR8 |
| C14orf93  | dgcr2   | CCL17    | CCR8 |
| C15orf61  | disp1   | CCL4     | CCR8 |
| C16orf89  | dmbt1   | CCL25    | CCR9 |

C17orf67  
C17orf69  
C17orf77  
C17orf99  
C18orf54  
C19orf10  
C19orf24  
C19orf63  
C19orf80  
C1orf134  
C1orf187  
C1orf191  
C1orf54  
C1orf56  
C1qa  
C1qb  
C1qbp  
C1qc  
C1ql1  
C1ql2  
C1ql3  
C1ql4  
C1qtnf1  
C1qtnf2  
C1qtnf3  
C1qtnf4  
C1qtnf5  
C1qtnf6  
C1qtnf7  
C1QTNF8  
C1qtnf9  
C1QTNF9B  
C1R  
C1rl  
C1S  
C2  
C22orf46  
C2CD2  
C2orf40  
C2orf66  
C2orf69  
C3  
C330005M16Rik  
C3orf58  
C3P1  
C4A  
C4b

dnajc13  
dner  
dpp4  
drd1  
drd1a  
drd2  
drd3  
drd4  
drd5  
ebi3  
ebp  
eda2r  
edar  
edaradd  
ednra  
ednrb  
efemp1  
efemp2  
efna3  
efna4  
efnb3  
egfr  
eif2d  
elovl4  
eltd1  
emr1  
emr2  
emr3  
emr4  
emr4p  
endou  
eng  
enpp1  
enpp2  
enpp3  
ep3-i  
epha1  
epha10  
epha2  
epha3  
epha4  
epha5  
epha6  
epha7  
epha8  
ephb1  
ephb2

CCL11 CCRL1  
CCL13 CCRL1  
CCL19 CCRL1  
CCL2 CCRL1  
CCL21 CCRL1  
CCL25 CCRL1  
CCL5 CCRL1  
CCL7 CCRL1  
CCL8 CCRL1  
CXCL13 CCRL1  
CCL2 CCRL2  
CD55 CD14  
LBP CD14  
LGALS3BP CD14  
LTF CD14  
TLR9 CD14  
HP CD163  
LY86 CD180  
B2M CD1D  
CALR CD1D  
P4HB CD1D  
CD59 CD2  
LGALS1 CD2  
CLEC4M CD209  
HP CD22  
IGHM CD22  
ST6GAL1 CD22  
PVR CD226  
CD2 CD247  
FCGR3A CD247  
TFRC CD247  
CD70 CD27  
IL12A CD28  
LEP CD33  
MUC2 CD33  
COL1A1 CD36  
COL1A2 CD36  
COL2A1 CD36  
COL4A1 CD36  
COL4A2 CD36  
COL6A1 CD36  
FN1 CD36  
ITGA6 CD36  
ITGB1 CD36  
LDLR CD36  
THBS1 CD36  
VLDLR CD36

|          |               |          |      |
|----------|---------------|----------|------|
| C4B-1    | ephb3         | FCGR3A   | CD38 |
| C4bp     | ephb4         | PECAM1   | CD38 |
| C4BPA    | ephb6         | CD8A     | CD3D |
| C4BPB    | epor          | CD8B     | CD3D |
| C4orf26  | eps15         | IGKC     | CD3E |
| C4orf29  | eps15l1       | LGALS1   | CD3E |
| C4orf40  | eps8          | ANXA1    | CD4  |
| C4orf48  | eps8l1        | ANXA2    | CD4  |
| C5       | erbb2         | CD2      | CD4  |
| C5orf38  | erbb3         | CTSD     | CD4  |
| C5orf46  | erbb4         | CXCL12   | CD4  |
| C5orf55  | errfi1        | DPP4     | CD4  |
| C5orf64  | esna1         | FCGR3A   | CD4  |
| C6       | esr1          | HSP90AA1 | CD4  |
| C6orf1   | esr2          | HSPA8    | CD4  |
| C6orf120 | esrra         | HSPD1    | CD4  |
| C6orf126 | esrrb         | IL16     | CD4  |
| C6orf127 | esrrg         | LGALS1   | CD4  |
| C6orf15  | evi2a         | PIP      | CD4  |
| C6orf186 | f2            | TFRC     | CD4  |
| C6orf27  | f2r           | YBX1     | CD4  |
| C6orf57  | f2r1          | CALR     | CD40 |
| C6orf58  | f2r2          | CD40LG   | CD40 |
| C7       | f2r3          | HSPA8    | CD40 |
| C7orf34  | f5h4k3        | IL4R     | CD40 |
| C7orf69  | f630003a18rik | TNFSF13B | CD40 |
| C7orf73  | f8vs73        | TXN      | CD40 |
| C85492   | f8wb81        | COL14A1  | CD44 |
| C8a      | fam89b        | COL1A1   | CD44 |
| C8b      | fas           | COL1A2   | CD44 |
| C8g      | fcamr         | DMP1     | CD44 |
| C8orf55  | fcar          | EGFR     | CD44 |
| C9       | fcer1a        | FGF2     | CD44 |
| C9orf47  | fcer1g        | FN1      | CD44 |
| C9orf8   | fcer2         | HBEGF    | CD44 |
| CA11     | fcer2a        | IGFBP3   | CD44 |
| CA2      | fcgr1         | LGALS9   | CD44 |
| CA6      | fcgr1a        | MMP1     | CD44 |
| CABP4    | fcgr1b        | MMP7     | CD44 |
| Calca    | fcgr1c        | MMP9     | CD44 |
| CALCB    | fcgr2a        | SELE     | CD44 |
| CALM3    | fcgr2b        | SPN      | CD44 |
| Calr     | fcgr2c        | SPP1     | CD44 |
| Calu     | fcgr3         | SRGN     | CD44 |
| Camp     | fcgr3a        | VCAN     | CD44 |
| CAP1     | fcgr3b        | C3       | CD46 |
| CAPZA1   | fcgrt         | C4B      | CD46 |

CAPZA2  
Car11  
Car15  
Car2  
Car6  
Cartpt  
Casp1  
Cbln1  
Cbln3  
Cbln4  
Ccbe1  
Ccdc126  
Ccdc134  
Ccdc3  
Ccdc70  
Ccdc80  
Cck  
Ccl1  
Ccl11  
Ccl12  
CCL13  
CCL14  
CCL15  
CCL16  
Ccl17  
CCL18  
CCL19  
Ccl2  
Ccl20  
CCL21  
Ccl22  
CCL23  
Ccl24  
Ccl25  
CCL26  
CCL27  
Ccl28  
Ccl3  
CCL3L1  
CCL3L3  
Ccl4  
CCL4L1  
CCL4L2  
Ccl5  
Ccl6  
Ccl7  
Ccl8

fcrl1  
fcrl2  
fcrl3  
fcrl4  
fcrl5  
fcrla  
fcr1s  
ffar1  
ffar2  
ffar3  
fgfr1  
fgfr2  
fgfr3  
fgfr4  
fgfr11  
fkbp1a  
fkbp3  
flt1  
flt3  
flt4  
flvcr1  
folr1  
folr2  
folr3  
folr4  
fpr1  
fpr2  
fpr3  
fpr-rs3  
fpr-rs4  
fpr-rs6  
frs3  
frzb  
fshr  
fzd1  
fzd10  
fzd2  
fzd3  
fzd4  
fzd5  
fzd6  
fzd7  
fzd8  
fzd9  
g6b  
gab1  
gab2

ITGB1 CD46  
ALDOA CD47  
FAS CD47  
FCER2 CD47  
ITGB1 CD47  
THBS1 CD47  
CD2 CD48  
CD2 CD5  
CD27 CD5  
CD14 CD55  
CD97 CD55  
GPLD1 CD55  
CD40LG CD5L  
CTSL1 CD7  
LGALS1 CD7  
SECTM1 CD7  
CTSL1 CD74  
MIF CD74  
AMBP CD79A  
FCAR CD79A  
FN1 CD79A  
IGHM CD79A  
IGJ CD79A  
PIGR CD79A  
B2M CD8A  
CD8B CD8A  
LGALS1 CD8A  
CD8A CD8B  
ST3GAL4 CD8B  
C1QA CD93  
COL1A1 CD93  
COL1A2 CD93  
COL4A1 CD93  
COL4A2 CD93  
COL4A3 CD93  
COL4A4 CD93  
COL4A5 CD93  
COL4A6 CD93  
F12 CD93  
KNG1 CD93  
MBL2 CD93  
SFTPA2 CD93  
CD55 CD97  
PSAP CELSR1  
CSF1 CELSR3  
UACA CELSR3  
C3 CFI

Ccl9  
CCR3  
Cd109  
Cd14  
CD163  
CD163L1  
CD164  
CD2  
CD200R1  
CD209  
CD248  
CD27  
Cd34  
CD40  
Cd40lg  
Cd46  
CD47  
CD55  
CD59  
Cd59b  
CD5L  
Cd70  
CD8A  
CD8B  
CD97  
CDA  
CDCP1  
Cdcp2  
Cdh13  
Cdnf  
Cdsn  
CEACAM1  
Ceacam10  
CEACAM8  
CECR1  
CECR9  
Cel  
CELA1  
Cela2a  
CELA2B  
CELA3B  
Cer1  
Ces1c  
CES1P1  
Ces4a  
Ces5a  
CETP

gab3  
gabarap  
gabarapl1  
gabbr1  
gabbr2  
gabra1  
gabra2  
gabra3  
gabra4  
gabra5  
gabra6  
gabrb1  
gabrb2  
gabrb3  
gabrd  
gabre  
gabrg1  
gabrg2  
gabrg3  
gabrp  
gabrq  
gabrr1  
gabrr2  
gabrr3  
galr1  
galr2  
galr3  
gcgr  
gfra1  
gfra2  
gfra3  
gfra4  
gfral  
ghr  
ghrhr  
ghsr  
gipr  
git1  
git2  
glp1r  
glp2r  
glra1  
glra2  
glra3  
glra4  
glrb  
gm106

CFH  
CRELD2  
APP  
CRELD2  
SHBG  
CD209  
CEACAM1  
MET  
CLCF1  
CNTF  
CRLF1  
IL6ST  
LIFR  
PLSCR1  
C1QA  
C3  
C4A  
C4B  
CD55  
C3  
FCER2  
IFNA1  
RAMP1  
CRH  
GNAS  
UCN  
UCN3  
CRH  
UCN  
UCN2  
UCN3  
CLCF1  
IL7R  
TSLP  
CSF1  
HSPA8  
CSF2  
KIT  
CSF2  
CSF2RA  
EPOR  
IL3  
IL5  
IL5RA  
KIT  
CSF2  
CSF3

CFI  
CHRNA4  
CHRNA7  
CHRN2  
CLDN4  
CLEC4M  
CLEC4M  
CNR1  
CNTFR  
CNTFR  
CNTFR  
CNTFR  
CNTFR  
CNTFR  
CR1  
CR1  
CR1  
CR1  
CR1  
CR2  
CR2  
CR2  
CRCP  
CRHR1  
CRHR1  
CRHR1  
CRHR2  
CRHR2  
CRHR2  
CRHR2  
CRLF1  
CRLF2  
CRLF2  
CSF1R  
CSF1R  
CSF2RA  
CSF2RA  
CSF2RB  
CSF2RB  
CSF2RB  
CSF2RB  
CSF2RB  
CSF2RB  
CSF2RB  
CSF3R  
CSF3R



CLEC18C  
CLEC19A  
Clec3a  
Clec3b  
CLEC4M  
Clps  
Clstn1  
Clu  
CLUL1  
Cma1  
Cml1  
Cml2  
Cml3  
Cml5  
CMTM1  
CMTM2  
Cmtm2a  
Cmtm2b  
Cmtm3  
Cmtm4  
Cmtm5  
Cmtm6  
Cmtm7  
Cmtm8  
CNDP1  
Cnp  
Cnpy4  
Cntf  
Cntn4  
CNTNAP3  
Coch  
Col10a1  
Col11a1  
Col11a2  
Col12a1  
Col13a1  
Col14a1  
Col15a1  
Col16a1  
Col17a1  
Col18a1  
Col19a1  
Col1a1  
Col1a2  
Col20a1  
COL21A1  
COL22A1

gpr148  
gpr149  
gpr15  
gpr150  
gpr151  
gpr152  
gpr153  
gpr155  
gpr156  
gpr157  
gpr158  
gpr160  
gpr161  
gpr162  
gpr165  
gpr17  
gpr171  
gpr172a  
gpr172b  
gpr173  
gpr174  
gpr176  
gpr177  
gpr179  
gpr18  
gpr182  
gpr183  
gpr19  
gpr20  
gpr21  
gpr22  
gpr25  
gpr26  
gpr27  
gpr3  
gpr30  
gpr31  
gpr32  
gpr33  
gpr34  
gpr35  
gpr37  
gpr3711  
gpr39  
gpr4  
gpr42  
gpr44

CXCL16 CXCR6  
AGR3 DAG1  
AGRN DAG1  
HSPG2 DAG1  
LAMA1 DAG1  
LAMA2 DAG1  
LAMA5 DAG1  
CCL17 DARC  
CCL2 DARC  
CCL5 DARC  
CCL7 DARC  
CCL8 DARC  
CXCL1 DARC  
CXCL5 DARC  
IL8 DARC  
PF4 DARC  
ALB DCC  
DSCAM DCC  
NTN1 DCC  
COL11A1 DDR1  
COL2A1 DDR1  
COL3A1 DDR1  
COL5A2 DDR1  
TTR DDR1  
COL11A2 DDR2  
COL1A1 DDR2  
COL3A1 DDR2  
ALB DERL1  
MFI2 DERL1  
SELS DERL1  
SFTPA1 DMBT1  
SFTPD DMBT1  
ADA DPP4  
CCL11 DPP4  
CCL22 DPP4  
CCL3L1 DPP4  
CCL5 DPP4  
CXCL10 DPP4  
CXCL11 DPP4  
CXCL12 DPP4  
CXCL2 DPP4  
CXCL9 DPP4  
GRP DPP4  
ADA DRD1  
FLNA DRD1  
FLNA DRD2  
FLNA DRD3





|          |             |          |       |
|----------|-------------|----------|-------|
| CPO      | grin2c      | BMP2     | ENG   |
| Cpxm1    | grin2d      | BMP7     | ENG   |
| Cpxm2    | grin3a      | INHBA    | ENG   |
| Cpz      | grin3b      | TGFB1    | ENG   |
| CR1L     | grk1        | TGFB2    | ENG   |
| CRB1     | grk5        | TGFB3    | ENG   |
| CRB2     | grk6        | TGFBR3   | ENG   |
| Creg1    | grlf1       | EFNA1    | EPHA1 |
| Creg2    | grm1        | EFNA1    | EPHA2 |
| Creld2   | grm2        | EFNA4    | EPHA2 |
| Crh      | grm3        | EGFR     | EPHA2 |
| Crhbp    | grm4        | EFNA1    | EPHA3 |
| Crim1    | grm5        | EFNA1    | EPHA4 |
| CRIP2    | grm6        | EFNA4    | EPHA4 |
| Crisp1   | grm7        | FGFR1    | EPHA4 |
| Crisp2   | grm8        | FGFR2    | EPHA4 |
| Crisp3   | grpr        | FGFR4    | EPHA4 |
| Crispld1 | gucy1a3     | EFNA1    | EPHA5 |
| Crispld2 | gucy1b3     | EFNA4    | EPHA5 |
| CRLF1    | gucy2c      | EFNA1    | EPHA6 |
| CRLF2    | gucy2d      | EFNA1    | EPHA7 |
| Crp      | gucy2f      | EFNA4    | EPHA7 |
| Crtac1   | gucy2g      | EFNA1    | EPHA8 |
| Crtap    | gypa        | EFNA4    | EPHA8 |
| Csf1     | havcr1      | EFNA1    | EPHB1 |
| Csf2     | hbegf       | EPHB6    | EPHB1 |
| CSF2RA   | hcar1       | AQP1     | EPHB2 |
| Csf3     | hcar2       | GRIN2B   | EPHB2 |
| CSF3R    | hcar3       | EGFR     | EPHB4 |
| CSH1     | hcg_1774561 | EPO      | EPOR  |
| CSH2     | hcg_2044188 | KIT      | EPOR  |
| CSHL1    | hctr1       | KITLG    | EPOR  |
| Csn1s1   | hctr2       | KLK3     | EPOR  |
| Csn1s2a  | hctr-5      | ACPP     | ERBB2 |
| Csn1s2b  | hctr-6      | BTC      | ERBB2 |
| Csn2     | heyl        | EGF      | ERBB2 |
| CSN3     | hhip1       | EGFR     | ERBB2 |
| CST1     | hla-a       | ERBB2IP  | ERBB2 |
| Cst10    | hla-b       | ERBB3    | ERBB2 |
| Cst11    | hla-c       | HSP90AA1 | ERBB2 |
| Cst12    | hla-doa     | IL6ST    | ERBB2 |
| Cst13    | hla-dob     | MUC1     | ERBB2 |
| CST2     | hla-dpa1    | MUC4     | ERBB2 |
| Cst3     | hla-dqa1    | NRG1     | ERBB2 |
| CST4     | hla-dqa2    | SERPINA3 | ERBB2 |
| CST5     | hla-dqb1    | TGFA     | ERBB2 |
| CST6     | hla-dqb2    | TLN1     | ERBB2 |



|           |          |          |        |
|-----------|----------|----------|--------|
| Dbi       | igsf6    | LGALS3   | FAS    |
| DCD       | il10ra   | MET      | FAS    |
| Dcn       | il10rb   | TNFRSF1A | FAS    |
| Dcpp1     | il11ra   | TNFSF13  | FAS    |
| DDR1      | il11ra1  | APCS     | FCAR   |
| DEAF1     | il12b    | CRP      | FCAR   |
| Defa1     | il12rb1  | PILRA    | FCAR   |
| Defa2     | il12rb2  | ITIH2    | FCER1A |
| Defa21    | il13ra1  | FCGR3A   | FCER1G |
| Defa22    | il13ra2  | CD47     | FCER2  |
| Defa24    | il15ra   | APCS     | FCGR1A |
| Defa25    | il17ra   | CRP      | FCGR1A |
| Defa26    | il17rb   | FCAR     | FCGR1A |
| Defa3     | il17rc   | FCGR3A   | FCGR1A |
| Defa4     | il17rd   | HRG      | FCGR1A |
| DEFA5     | il17re   | CRP      | FCGR2A |
| Defa6     | il18r1   | LGALS3   | FCGR2A |
| Defa-rs10 | il18rap  | APCS     | FCGR2B |
| Defa-rs12 | il1r1    | CRP      | FCGR2B |
| Defa-rs2  | il1r2    | IGHG1    | FCGR2B |
| Defb1     | il1rap   | CRP      | FCGR2C |
| Defb10    | il1rapl1 | APCS     | FCGR3A |
| DEFB103A  | il1rapl2 | IGHG1    | FCGR3A |
| DEFB104B  | il1rl1   | APCS     | FCGR3B |
| DEFB105A  | il1rl2   | IGHG1    | FCGR3B |
| DEFB106B  | il1rn    | ALB      | FCGRT  |
| DEFB107B  | il20ra   | B2M      | FCGRT  |
| DEFB108B  | il20rb   | CA6      | FCGRT  |
| DEFB108P1 | il21r    | ERBB3    | FGFR1  |
| DEFB109   | il22ra1  | FGF1     | FGFR1  |
| Defb11    | il22ra2  | FGF17    | FGFR1  |
| DEFB110   | il23r    | FGF18    | FGFR1  |
| DEFB112   | il27ra   | FGF2     | FGFR1  |
| DEFB113   | il28ra   | FGF3     | FGFR1  |
| DEFB114   | il2ra    | FGF4     | FGFR1  |
| DEFB115   | il2rb    | FGF5     | FGFR1  |
| DEFB116   | il2rg    | FGF6     | FGFR1  |
| DEFB118   | il31ra   | FGF7     | FGFR1  |
| DEFB119   | il3ra    | FGF8     | FGFR1  |
| Defb12    | il4r     | FGF9     | FGFR1  |
| DEFB121   | il4ra    | IGHG1    | FGFR1  |
| DEFB123   | il5ra    | MMP2     | FGFR1  |
| DEFB124   | il6r     | NCAM1    | FGFR1  |
| DEFB125   | il6ra    | NRP1     | FGFR1  |
| DEFB126   | il6st    | RTN3     | FGFR1  |
| DEFB127   | il7r     | FGF1     | FGFR2  |
| DEFB128   | il8rb    | FGF10    | FGFR2  |

|                |        |        |        |
|----------------|--------|--------|--------|
| DEFB129        | il9r   | FGF17  | FGFR2  |
| Defb13         | ildr1  | FGF18  | FGFR2  |
| DEFB130        | impg1  | FGF2   | FGFR2  |
| DEFB131        | impg2  | FGF23  | FGFR2  |
| DEFB132        | insr   | FGF3   | FGFR2  |
| DEFB133        | insrr  | FGF4   | FGFR2  |
| DEFB134        | ints6  | FGF5   | FGFR2  |
| DEFB135        | irak1  | FGF6   | FGFR2  |
| DEFB136        | irak3  | FGF7   | FGFR2  |
| Defb14         | irs1   | FGF8   | FGFR2  |
| Defb15         | irs3   | FGF9   | FGFR2  |
| Defb18         | itga1  | CHGB   | FGFR3  |
| Defb19         | itga10 | CTSK   | FGFR3  |
| Defb2          | itga11 | FGF1   | FGFR3  |
| Defb20         | itga2  | FGF17  | FGFR3  |
| Defb25         | itga2b | FGF18  | FGFR3  |
| Defb29         | itga3  | FGF2   | FGFR3  |
| Defb3          | itga4  | FGF23  | FGFR3  |
| Defb30         | itga5  | FGF3   | FGFR3  |
| Defb34         | itga6  | FGF4   | FGFR3  |
| Defb35         | itga7  | FGF5   | FGFR3  |
| Defb36         | itga8  | FGF6   | FGFR3  |
| Defb37         | itga9  | FGF7   | FGFR3  |
| Defb38         | itgad  | FGF8   | FGFR3  |
| Defb39         | itgae  | FGF9   | FGFR3  |
| Defb4          | itgal  | FGF1   | FGFR4  |
| Defb40         | itgam  | FGF17  | FGFR4  |
| Defb41         | itgav  | FGF18  | FGFR4  |
| Defb43         | itgax  | FGF19  | FGFR4  |
| DEFB4B         | itgb1  | FGF2   | FGFR4  |
| Defb50         | itgb2  | FGF3   | FGFR4  |
| Defb6          | itgb2l | FGF4   | FGFR4  |
| Defb7          | itgb3  | FGF5   | FGFR4  |
| Defb8          | itgb4  | FGF6   | FGFR4  |
| Defb9          | itgb5  | FGF7   | FGFR4  |
| DGCR6          | itgb6  | FGF8   | FGFR4  |
| Dhh            | itgb7  | FGF9   | FGFR4  |
| Dhrs11         | itgb8  | FGF2   | FGFRL1 |
| Dhrs13         | itgb11 | LDLR   | FLT1   |
| DHRS4L2        | itpr1  | NRP1   | FLT1   |
| Dhrs7c         | itpr2  | PGF    | FLT1   |
| DKFZp586F0824  | itpr3  | VEGFA  | FLT1   |
| DKFZp686G21263 | jmjd6  | VEGFB  | FLT1   |
| Dkk1           | kdelr1 | FLT3LG | FLT3   |
| Dkk2           | kdelr2 | FIGF   | FLT4   |
| Dkk3           | kdelr3 | ITGB1  | FLT4   |
| Dkk4           | kdr    | VEGFC  | FLT4   |

|          |          |        |        |
|----------|----------|--------|--------|
| Dkk1     | kir2dl1  | ANXA1  | FPR1   |
| DLK1     | kir2dl2  | SAA1   | FPR1   |
| DLL1     | kir2dl3  | CAMP   | FPR2   |
| DMBT1    | kir2dl4  | FGFR1  | FRS3   |
| Dmkn     | kir2dl5a | KARS   | FRS3   |
| Dmp1     | kir2dl5b | CGA    | FSHR   |
| Dnajc10  | kir2ds1  | FSHB   | FSHR   |
| Dnase1   | kir2ds2  | WNT2   | FZD1   |
| Dnase1l2 | kir2ds3  | WNT3   | FZD1   |
| Dnase2b  | kir2ds4  | WNT3A  | FZD1   |
| DPP4     | kir2ds5  | WNT5A  | FZD1   |
| Dpp7     | kir3dl1  | NDP    | FZD4   |
| Dpt      | kir3dl2  | WNT5A  | FZD5   |
| Dpysl3   | kir3dl3  | WNT7A  | FZD5   |
| Dsc3     | kir3ds1  | SFRP1  | FZD6   |
| DSCAM    | kiss1r   | WNT4   | FZD6   |
| Dspp     | kit      | WNT1   | FZD8   |
| DST      | klra1    | WNT1   | FZD9   |
| EBI3     | klra12   | WNT2   | FZD9   |
| Ecm1     | klra14   | WNT7A  | FZD9   |
| Ecm2     | klra15   | ALB    | GABBR1 |
| Eda      | klra16   | APP    | GABBR1 |
| EDDM3A   | klra17   | GABBR1 | GABBR2 |
| EDDM3B   | klra18   | GABBR1 | GABRA1 |
| EDEM2    | klra19   | GABRA6 | GABRA1 |
| Edil3    | klra2    | GABRA6 | GABRA2 |
| Edn1     | klra20   | GABRA6 | GABRA3 |
| Edn2     | klra21   | GABRA6 | GABRA4 |
| Edn3     | klra22   | C1QBP  | GABRB1 |
| EFEMP1   | klra23   | GABBR1 | GABRB2 |
| EFEMP2   | klra4    | GABRA6 | GABRB2 |
| Efhb     | klra5    | GABRA6 | GABRB3 |
| Efna1    | klra6    | GABBR1 | GABRG2 |
| EFNA4    | klra7    | GABRA6 | GABRG3 |
| EG654453 | klra8    | GAL    | GALR1  |
| Egf      | klra9    | GAL    | GALR2  |
| Egfl6    | klrb1    | GCG    | GCGR   |
| Egfl7    | klrb1a   | GNAS   | GCGR   |
| Egfl8    | klrb1b   | GDNF   | GFRA1  |
| Egflam   | klrb1c   | NCAM1  | GFRA1  |
| EGFR     | klrc1    | NRTN   | GFRA1  |
| ELANE    | klrc2    | GDNF   | GFRA2  |
| Eln      | klrc3    | NRTN   | GFRA2  |
| ELSPBP1  | klrc4    | ARTN   | GFRA3  |
| EMCN     | klrd1    | PSPN   | GFRA4  |
| Emid1    | klre1    | GH1    | GHR    |
| Emid2    | klrf1    | GH2    | GHR    |

|         |          |
|---------|----------|
| Emilin1 | klrf2    |
| Emilin2 | klrg1    |
| Emilin3 | klri1    |
| EMR3    | klri2    |
| Enam    | klrk1    |
| Endod1  | kpg_004  |
| ENDOU   | krt1     |
| ENG     | ktn1     |
| Enho    | lag3     |
| Enox1   | lair1    |
| Enox2   | lair2    |
| ENPP1   | lancl1   |
| ENPP2   | lbr      |
| ENPP3   | lcor     |
| Enpp5   | ldlr     |
| ENPP6   | ldlrad1  |
| Entpd1  | ldlrad2  |
| Entpd2  | ldlrad3  |
| Entpd6  | lef1     |
| Epdr1   | leng4    |
| EPGN    | leng8    |
| EPHA10  | leng9    |
| EPHA3   | lepr     |
| EPHB6   | lgals3bp |
| Ephx3   | lgr4     |
| Epo     | lgr5     |
| EPOR    | lgr6     |
| Epyc    | lhcgr    |
| Erap1   | lifr     |
| ERBB2IP | lilra1   |
| ERBB3   | lilra2   |
| Ereg    | lilra3   |
| Es2     | lilra4   |
| Esm1    | lilra5   |
| Expi    | lilra6   |
| EXTL2   | lilrb1   |
| EYS     | lilrb2   |
| F10     | lilrb3   |
| F11     | lilrb4   |
| F12     | lilrb5   |
| F13a1   | lmb1     |
| F13B    | lmb1     |
| F2      | lnpep    |
| F2R     | lox12    |
| F2RL2   | lox13    |
| F2RL3   | lox14    |
| F3      | lpar1    |

|        |        |
|--------|--------|
| GHRH   | GHRHR  |
| GHRL   | GHRHR  |
| CORT   | GHSR   |
| GHRL   | GHSR   |
| GCG    | GIPR   |
| GIP    | GIPR   |
| GCG    | GLP1R  |
| GCG    | GLP2R  |
| GNRH1  | GNRHR  |
| EBI3   | GOSR1  |
| CTSG   | GP1BA  |
| F11    | GP1BA  |
| F12    | GP1BA  |
| F2     | GP1BA  |
| FLNA   | GP1BA  |
| KNG1   | GP1BA  |
| SELP   | GP1BA  |
| VWF    | GP1BA  |
| VWF    | GP1BB  |
| CRP    | GP6    |
| FCGR3A | GP6    |
| APOA1  | GPLD1  |
| APOA4  | GPLD1  |
| CD55   | GPLD1  |
| GAL    | GPR151 |
| C3     | GPR77  |
| C4A    | GPR77  |
| HSPA5  | GRIA1  |
| GRIA3  | GRIA2  |
| ACTN1  | GRIA4  |
| FLNA   | GRIK1  |
| GRIN2B | GRIK2  |
| FLNA   | GRIK3  |
| LRSAM1 | GRIK5  |
| ACTN2  | GRIN1  |
| ACTN4  | GRIN1  |
| GRIN2B | GRIN1  |
| LRP8   | GRIN1  |
| MAP2K2 | GRIN1  |
| PLAT   | GRIN1  |
| SLMAP  | GRIN1  |
| STX1A  | GRIN1  |
| TUBA4A | GRIN1  |
| ACTN1  | GRIN2A |
| GRIN2B | GRIN2A |
| IL16   | GRIN2A |
| ACTN2  | GRIN2B |

|          |        |
|----------|--------|
| F5       | lpar2  |
| F7       | lpar3  |
| F8       | lpar4  |
| F8VSI5   | lpar5  |
| F8VX64   | lpar6  |
| F8WCM5   | lphn1  |
| F9       | lphn2  |
| Fam108a  | lphn3  |
| FAM108A1 | lrp1   |
| Fam108b  | lrp10  |
| FAM108B1 | lrp11  |
| Fam131a  | lrp12  |
| Fam132a  | lrp1b  |
| Fam132b  | lrp2   |
| FAM150A  | lrp3   |
| FAM150B  | lrp4   |
| Fam172a  | lrp5   |
| Fam180a  | lrp5l  |
| Fam198a  | lrp6   |
| Fam19a1  | lrp8   |
| Fam19a3  | lrpap1 |
| Fam19a4  | lrrn2  |
| Fam19a5  | lsr    |
| Fam20a   | ltb4r  |
| Fam20c   | ltb4r1 |
| Fam24a   | ltb4r2 |
| FAM24B   | ltbp1  |
| Fam3a    | ltbp4  |
| Fam3b    | ltbr   |
| Fam3c    | ltk    |
| FAM3D    | ly75   |
| FAM55A   | ly9    |
| FAM55C   | ly96   |
| Fam55d   | lyve1  |
| Fam5b    | m6pr   |
| Fam5c    | marco  |
| FAS      | mas1   |
| Fasl     | mas1l  |
| FASLG    | mc1r   |
| Fbln1    | mc2r   |
| FBLN2    | mc3r   |
| Fbln5    | mc4r   |
| Fbln7    | mc5r   |
| Fbn1     | mcc    |
| Fbn2     | mchr1  |
| FBN3     | mchr2  |
| FCAR     | med1   |

|          |         |
|----------|---------|
| ACTN4    | GRIN2B  |
| CAPZA2   | GRIN2B  |
| ERBB2IP  | GRIN2B  |
| GNAS     | GRIN2B  |
| GSN      | GRIN2B  |
| IL16     | GRIN2B  |
| LGI1     | GRIN2B  |
| MAP2K2   | GRIN2B  |
| SPINK5   | GRIN2B  |
| STX1A    | GRIN2B  |
| VEGFA    | GRIN2B  |
| ERBB2IP  | GRIN2C  |
| IL16     | GRIN2C  |
| IL16     | GRIN2D  |
| MAP2K2   | GRIN2D  |
| GRIN2B   | GRIN3A  |
| SNCA     | GRK1    |
| SNCA     | GRK5    |
| PRSS23   | GRK6    |
| SNCA     | GRK6    |
| PTPRZ1   | GRLF1   |
| GRIN2B   | GRM1    |
| FLNA     | GRM4    |
| FLNA     | GRM5    |
| GRIN2B   | GRM5    |
| FLNA     | GRM7    |
| TUBA4A   | GRM7    |
| FLNA     | GRM8    |
| GRP      | GRPR    |
| HSP90AA1 | GUCY1B3 |
| GUCA2A   | GUCY2C  |
| GUCA1B   | GUCY2D  |
| GUCA2B   | GUCY2D  |
| S100B    | GUCY2D  |
| TUBA4A   | GUCY2D  |
| GUCA1B   | GUCY2F  |
| EGFR     | HBEGF   |
| FBLN1    | HBEGF   |
| LTBP3    | HBEGF   |
| MMP7     | HBEGF   |
| HCRT     | HCRTR1  |
| HCRT     | HCRTR2  |
| HABP2    | HNF4A   |
| SERPINA1 | HNF4A   |
| VTN      | HNF4A   |
| F7       | HPN     |
| HGF      | HPN     |

|        |         |        |        |
|--------|---------|--------|--------|
| FCER2  | med12   | IL6    | HRH1   |
| FCGBP  | med13   | CCL16  | HRH4   |
| FCGR3A | med14   | PON2   | HTR2A  |
| FCGR3B | med16   | HSPA5  | HTR3A  |
| FCN1   | med17   | GNAS   | HTR6   |
| FCN2   | med24   | EGFR   | ICAM1  |
| FCN3   | med30   | FGG    | ICAM1  |
| Fcna   | med4    | SPN    | ICAM1  |
| Fcnb   | mertk   | IFNA2  | IFNAR1 |
| Fcrla  | met     | IFNA8  | IFNAR1 |
| FDCSP  | mfsd6   | IFNAR2 | IFNAR1 |
| Fetub  | mlnr    | IFNB1  | IFNAR1 |
| Fga    | mmd     | IFNW1  | IFNAR1 |
| Fgb    | mmd2    | IFNA1  | IFNAR2 |
| Fgf1   | mpl     | IFNA2  | IFNAR2 |
| Fgf10  | mr1     | IFNA5  | IFNAR2 |
| FGF12  | mrc1    | IFNA8  | IFNAR2 |
| Fgf15  | mrc2    | IFNB1  | IFNAR2 |
| Fgf16  | mrgpra1 | IL10   | IFNAR2 |
| Fgf17  | mrgpra3 | IL22   | IFNAR2 |
| Fgf18  | mrgpra4 | IFNG   | IFNGR1 |
| FGF19  | mrgpra5 | ANXA5  | IFNGR2 |
| Fgf2   | mrgpra6 | IFNG   | IFNGR2 |
| Fgf20  | mrgpra7 | EGFR   | IGF1R  |
| Fgf21  | mrgpra8 | IGF1   | IGF1R  |
| Fgf22  | mrgprb1 | IGF2   | IGF1R  |
| Fgf23  | mrgprb2 | IGFBP3 | IGF1R  |
| FGF3   | mrgprb3 | INS    | IGF1R  |
| Fgf4   | mrgprb4 | ITGB1  | IGF1R  |
| Fgf5   | mrgprb5 | WISP2  | IGF1R  |
| Fgf6   | mrgprb8 | CREG1  | IGF2R  |
| Fgf7   | mrgprd  | CTSD   | IGF2R  |
| Fgf8   | mrgpre  | IGF2   | IGF2R  |
| Fgf9   | mrgprf  | PLAU   | IGF2R  |
| Fgfbp1 | mrgprg  | PLAUR  | IGF2R  |
| FGFBP2 | mrgprh  | WISP2  | IGF2R  |
| Fgfbp3 | mrgprx1 | IFNAR2 | IL10RA |
| FGFR1  | mrgprx2 | IL10   | IL10RA |
| FGFR2  | mrgprx3 | IL10   | IL10RB |
| FGFR4  | mrgprx4 | IL22   | IL10RB |
| Fgg    | ms4a10  | IL28A  | IL10RB |
| Fgl1   | ms4a12  | IL28B  | IL10RB |
| Fgl2   | ms4a13  | IL29   | IL10RB |
| Fhad1  | ms4a14  | UCN2   | IL10RB |
| Fibcd1 | ms4a15  | UCN3   | IL10RB |
| Fibin  | ms4a2   | IL11   | IL11RA |
| Figf   | ms4a3   | IL6ST  | IL11RA |



|        |        |        |         |
|--------|--------|--------|---------|
| Fjx1   | ms4a4a | IL11   | IL11RA1 |
| Fkrp   | ms4a4d | IL12A  | IL12B   |
| FKTN   | ms4a4e | IL23A  | IL12B   |
| FLNA   | ms4a5  | IL12A  | IL12RB1 |
| FLRT1  | ms4a6a | IL12B  | IL12RB1 |
| FLRT2  | ms4a6b | IL23A  | IL12RB1 |
| FLRT3  | ms4a6c | IL12A  | IL12RB2 |
| FLT1   | ms4a6d | IL12B  | IL12RB2 |
| Flt3l  | ms4a6e | IL13   | IL13RA1 |
| FLT3LG | ms4a7  | IL4    | IL13RA1 |
| Fmo2   | ms4a8a | IL4R   | IL13RA1 |
| Fmod   | ms4a8b | IL13   | IL13RA2 |
| Fn1    | msr1   | IL4    | IL13RA2 |
| FNDC1  | mst1r  | IL15   | IL15RA  |
| Fndc7  | mtnr1a | IL17A  | IL17RA  |
| FOLR1  | mtnr1b | IL17F  | IL17RA  |
| FOLR2  | mup12  | IL25   | IL17RA  |
| FOLR3  | musk   | IL17B  | IL17RB  |
| FOLR4  | myd88  | IL25   | IL17RB  |
| FP248  | narg2  | IL17A  | IL17RC  |
| Fras1  | ncoa3  | IL17F  | IL17RC  |
| Frem1  | ncoa4  | FGFR1  | IL17RD  |
| Frem2  | ncoa5  | IL17RB | IL17RD  |
| Frem3  | ncoa6  | IL18   | IL18R1  |
| FRZB   | ncoa7  | IL1RAP | IL18R1  |
| Fshb   | ncor1  | IL18   | IL18RAP |
| Fst    | ncr1   | FREM1  | IL1R1   |
| Fstl1  | ncr2   | IL1A   | IL1R1   |
| Fstl3  | ncr3   | IL1B   | IL1R1   |
| Fstl4  | neo1   | IL1F10 | IL1R1   |
| Fstl5  | neto1  | IL1RAP | IL1R1   |
| Fuca2  | neto2  | IL1RN  | IL1R1   |
| Furin  | nfam1  | IL1A   | IL1R2   |
| GABBR1 | ngfr   | IL1B   | IL1R2   |
| GABRA6 | niacr1 | IL1RAP | IL1R2   |
| Gal    | nipal4 | IL1RN  | IL1R2   |
| Galnt1 | nisch  | IL1A   | IL1RAP  |
| Galnt2 | nkx3-1 | IL1B   | IL1RAP  |
| Galp   | nlgn1  | IL1RL1 | IL1RAP  |
| Gas6   | nlgn2  | IL1RAP | IL1RL1  |
| GAST   | nlgn3  | IL33   | IL1RL1  |
| Gbp1   | nlgn4l | IL18   | IL1RL2  |
| Gbp2   | nlgn4x | IL19   | IL20RA  |
| Gbp3   | nlgn4y | IL20   | IL20RA  |
| Gbp6   | nibr   | IL24   | IL20RA  |
| Gbp7   | nmur1  | IL26   | IL20RA  |
| Gbp9   | nmur2  | IL19   | IL20RB  |

|          |         |        |         |
|----------|---------|--------|---------|
| Gc       | notch1  | IL20   | IL20RB  |
| Gcg      | notch2  | IL24   | IL20RB  |
| Gcnt1    | notch3  | IL2    | IL21R   |
| Gdf1     | notch4  | IL21   | IL21R   |
| Gdf10    | npbwr1  | IL22   | IL22RA1 |
| Gdf11    | npbwr2  | IL22   | IL22RA2 |
| GDF15    | npc1    | IL12B  | IL23R   |
| Gdf2     | npc1l1  | IL23A  | IL23R   |
| Gdf3     | npffr1  | EBI3   | IL27RA  |
| Gdf5     | npffr2  | IL27   | IL27RA  |
| Gdf6     | npr1    | IL28A  | IL28RA  |
| Gdf7     | npr2    | IL28B  | IL28RA  |
| Gdf9     | npr3    | IL29   | IL28RA  |
| Gdnf     | npsr1   | ICAM1  | IL2RA   |
| GFER     | nptxr   | IL2    | IL2RA   |
| Gfod1    | npvf    | ECM1   | IL2RB   |
| Gfod2    | npy     | IL15   | IL2RB   |
| GFRA4    | npy1r   | IL15RA | IL2RB   |
| Ggh      | npy2r   | IL2    | IL2RB   |
| Ggt1     | npy5r   | ICAM1  | IL2RG   |
| Gh       | npy6r   | IL15   | IL2RG   |
| GH1      | nr0b1   | IL15RA | IL2RG   |
| GH2      | nr0b2   | IL2    | IL2RG   |
| GHR      | nr1d1   | IL21   | IL2RG   |
| Ghrh     | nr1d2   | IL4    | IL2RG   |
| Ghrl     | nr1h2   | IL4R   | IL2RG   |
| Gif      | nr1h3   | IL7    | IL2RG   |
| GIP      | nr1h4   | IL7R   | IL2RG   |
| Gkn1     | nr1h5   | IL9    | IL2RG   |
| Gkn2     | nr1i2   | IL9R   | IL2RG   |
| Gkn3     | nr1i3   | IL6ST  | IL31RA  |
| GKN3P    | nr2c1   | LIFR   | IL31RA  |
| Gla      | nr2c2   | CSF2   | IL3RA   |
| Glb1l    | nr2c2ap | EPOR   | IL3RA   |
| Glb1l2   | nr2e1   | IL3    | IL3RA   |
| Gldn     | nr2e3   | CD40   | IL4R    |
| Glg1     | nr2f1   | IL13   | IL4R    |
| Glipr1   | nr2f2   | IL4    | IL4R    |
| GLIPR1L1 | nr2f6   | IL5    | IL5RA   |
| Glipr2   | nr3c1   | CNTF   | IL6R    |
| Glt1d1   | nr3c2   | ERAP1  | IL6R    |
| Glycam1  | nr4a1   | IL6    | IL6R    |
| Gm12597  | nr4a2   | IL6ST  | IL6R    |
| Gm128    | nr4a3   | IL6ST  | IL6RA   |
| Gm13271  | nr5a1   | CNTF   | IL6ST   |
| Gm13275  | nr5a2   | CTF1   | IL6ST   |
| Gm13276  | nr6a1   | ERBB3  | IL6ST   |

|         |          |          |       |
|---------|----------|----------|-------|
| Gm13280 | nradd    | IL11     | IL6ST |
| Gm13283 | nrbf2    | IL6      | IL6ST |
| Gm15386 | nrg2     | IL6R     | IL6ST |
| Gm1673  | nrip1    | LIF      | IL6ST |
| Gm17365 | nrp1     | LIFR     | IL6ST |
| Gm46    | nrp2     | OSM      | IL6ST |
| Gm5077  | nrxn1    | PLAUR    | IL6ST |
| Gm525   | nrxn3    | ALB      | IL7R  |
| Gm6484  | ntrk1    | APOA1    | IL7R  |
| Gm749   | ntrk2    | CALR     | IL7R  |
| Gm885   | ntrk3    | CAPZA1   | IL7R  |
| Gm94    | ntsr1    | CRLF2    | IL7R  |
| Gnas    | ntsr2    | F13A1    | IL7R  |
| GNG8    | nus1     | FGG      | IL7R  |
| GNGT2   | o3far1   | GSN      | IL7R  |
| GNL1    | ogfr     | HSPA5    | IL7R  |
| GNLY    | ogfrl1   | HSPA8    | IL7R  |
| Gnptg   | olfr1    | HSPD1    | IL7R  |
| Gnrh1   | olfr10   | IL7      | IL7R  |
| GNRH2   | olfr100  | LGALS1   | IL7R  |
| Gp2     | olfr1000 | P4HB     | IL7R  |
| Gpc1    | olfr1002 | PEBP1    | IL7R  |
| Gpc2    | olfr1006 | PFN1     | IL7R  |
| Gpc3    | olfr1008 | PLEK     | IL7R  |
| Gpc4    | olfr1009 | PPBP     | IL7R  |
| Gpc5    | olfr101  | SOD1     | IL7R  |
| Gpc6    | olfr1010 | TF       | IL7R  |
| Gpha2   | olfr1012 | TSLP     | IL7R  |
| Gphb5   | olfr1013 | TTR      | IL7R  |
| GPI     | olfr1014 | TUBA4A   | IL7R  |
| Gpi1    | olfr1015 | TXN      | IL7R  |
| Gpihbp1 | olfr1016 | VCL      | IL7R  |
| GPLD1   | olfr1018 | IL9      | IL9R  |
| Gpx3    | olfr1019 | AHSG     | INSR  |
| GPX5    | olfr102  | CEACAM1  | INSR  |
| GPX6    | olfr1020 | ENPP1    | INSR  |
| Gpx7    | olfr1022 | IGF2     | INSR  |
| Grem1   | olfr1023 | INS      | INSR  |
| Grem2   | olfr1024 | ANXA1    | IRAK1 |
| GRIA3   | olfr1026 | DKK3     | IRAK1 |
| GRIN2B  | olfr1028 | DLK1     | IRAK1 |
| Grn     | olfr1029 | FBLN2    | IRAK1 |
| Grp     | olfr103  | HSP90AA1 | IRAK1 |
| Gsn     | olfr1030 | HSPA8    | IRAK1 |
| Gstm1   | olfr1031 | IL10     | IRAK1 |
| GUCA1B  | olfr1032 | IL1RAP   | IRAK1 |
| Guca2a  | olfr1033 | IL1RL1   | IRAK1 |

|          |          |        |        |
|----------|----------|--------|--------|
| Guca2b   | olfr1034 | NGFR   | IRAK1  |
| Gzma     | olfr1036 | NOTCH2 | IRAK1  |
| GZMK     | olfr1037 | COL6A3 | ITGA1  |
| GZMM     | olfr1039 | COL8A1 | ITGA1  |
| H3F3B    | olfr1040 | ITGB1  | ITGA1  |
| H47      | olfr1042 | LAMA1  | ITGA1  |
| Habp2    | olfr1043 | LGALS8 | ITGA1  |
| HABP4    | olfr1044 | MATN1  | ITGA1  |
| Hamp     | olfr1045 | TGM2   | ITGA1  |
| Hamp2    | olfr1046 | TLN1   | ITGA1  |
| Hapln1   | olfr1047 | ITGB1  | ITGA10 |
| Hapln2   | olfr1048 | ITGB1  | ITGA11 |
| Hapln3   | olfr1049 | ALB    | ITGA2  |
| Hapln4   | olfr1051 | CD46   | ITGA2  |
| Hbegf    | olfr1052 | CD47   | ITGA2  |
| Hc       | olfr1053 | CHAD   | ITGA2  |
| HCG22    | olfr1054 | COL1A1 | ITGA2  |
| HCRT     | olfr1055 | COL1A2 | ITGA2  |
| Hdgf     | olfr1056 | COL6A3 | ITGA2  |
| Hdlbp    | olfr1057 | COL8A1 | ITGA2  |
| HEBP1    | olfr1058 | HSPG2  | ITGA2  |
| HEG1     | olfr1060 | ITGB1  | ITGA2  |
| Hfe2     | olfr1061 | LAMA1  | ITGA2  |
| Hgf      | olfr1062 | MMP1   | ITGA2  |
| Hgfac    | olfr1065 | CALR   | ITGA2B |
| hGH-V    | olfr1066 | CD47   | ITGA2B |
| Hhip     | olfr107  | COL1A2 | ITGA2B |
| HHIPL1   | olfr1071 | COL2A1 | ITGA2B |
| Hhipl2   | olfr1076 | CTSG   | ITGA2B |
| Hhla1    | olfr1079 | F2     | ITGA2B |
| HIG2     | olfr108  | FGA    | ITGA2B |
| HIST1H3G | olfr1080 | IL7R   | ITGA2B |
| HIST1H4K | olfr1082 | TGM2   | ITGA2B |
| HIST2H3A | olfr1084 | TLN1   | ITGA2B |
| HLA-C    | olfr1085 | VWF    | ITGA2B |
| Hmcn1    | olfr1086 | ADAM9  | ITGA3  |
| Hmcn2    | olfr1087 | CALR   | ITGA3  |
| Hmgb1    | olfr1089 | FN1    | ITGA3  |
| Hmgb2    | olfr109  | ITGB1  | ITGA3  |
| HMOX1    | olfr1090 | LAMA3  | ITGA3  |
| HMSD     | olfr1093 | LAMA4  | ITGA3  |
| Hp       | olfr1094 | LGALS8 | ITGA3  |
| HPR      | olfr1095 | TGM2   | ITGA3  |
| Hpse     | olfr1097 | THBS1  | ITGA3  |
| Hpx      | olfr1098 | TIMP2  | ITGA3  |
| Hrg      | olfr1099 | ADAM28 | ITGA4  |
| HS3ST4   | olfr11   | CD47   | ITGA4  |

|          |          |         |       |
|----------|----------|---------|-------|
| HSD11B1L | olfr110  | EMILIN1 | ITGA4 |
| Hsd17b11 | olfr1100 | FN1     | ITGA4 |
| Hsd17b12 | olfr1101 | ICAM4   | ITGA4 |
| HSD17B13 | olfr1102 | ITGB1   | ITGA4 |
| Hsp90aa1 | olfr1104 | LGALS8  | ITGA4 |
| HSPA5    | olfr1105 | LGALS9  | ITGA4 |
| Hspa8    | olfr1106 | TGFB1I1 | ITGA4 |
| Hspd1    | olfr1107 | THBS1   | ITGA4 |
| Hspg2    | olfr1109 | THBS2   | ITGA4 |
| Hsph1    | olfr111  | VCAM1   | ITGA4 |
| HTN1     | olfr1110 | VCAN    | ITGA4 |
| HTN3     | olfr1111 | ANGPT1  | ITGA5 |
| Htra1    | olfr1112 | ANGPTL3 | ITGA5 |
| Htra3    | olfr1113 | CD40LG  | ITGA5 |
| HTRA4    | olfr1115 | COL18A1 | ITGA5 |
| Hyal1    | olfr1118 | COL1A1  | ITGA5 |
| Hyal3    | olfr112  | COL6A3  | ITGA5 |
| lapp     | olfr1120 | CTGF    | ITGA5 |
| lbsp     | olfr1121 | EGFR    | ITGA5 |
| Icam1    | olfr1122 | F2      | ITGA5 |
| Icam4    | olfr1123 | FGFR2   | ITGA5 |
| ICOS     | olfr1124 | FN1     | ITGA5 |
| Ide      | olfr1126 | IGFBP2  | ITGA5 |
| Ifi30    | olfr1128 | ITGB1   | ITGA5 |
| Ifna1    | olfr1129 | LAMA4   | ITGA5 |
| IFNA10   | olfr113  | LGALS8  | ITGA5 |
| Ifna11   | olfr1130 | LGALS9  | ITGA5 |
| Ifna12   | olfr1131 | MMP9    | ITGA5 |
| Ifna13   | olfr1132 | PECAM1  | ITGA5 |
| Ifna14   | olfr1133 | SFRP2   | ITGA5 |
| IFNA16   | olfr1134 | SPP1    | ITGA5 |
| IFNA17   | olfr1135 | TGM2    | ITGA5 |
| Ifna2    | olfr1136 | TNC     | ITGA5 |
| IFNA21   | olfr1137 | ADAM9   | ITGA6 |
| Ifna4    | olfr1138 | COL17A1 | ITGA6 |
| Ifna5    | olfr114  | ITGB1   | ITGA6 |
| Ifna6    | olfr1140 | LAMA2   | ITGA6 |
| Ifna7    | olfr1141 | LAMA5   | ITGA6 |
| IFNA8    | olfr1143 | LAMB1   | ITGA6 |
| Ifna9    | olfr1145 | LAMB2   | ITGA6 |
| Ifnab    | olfr1148 | LAMB3   | ITGA6 |
| IFNAR2   | olfr115  | LAMC1   | ITGA6 |
| Ifnb1    | olfr1151 | PCSK5   | ITGA6 |
| Ifne     | olfr1152 | ITGB1   | ITGA7 |
| Ifng     | olfr1153 | MYOC    | ITGA7 |
| Ifnk     | olfr1154 | FN1     | ITGA8 |
| IFNW1    | olfr1155 | ITGB1   | ITGA8 |

|         |          |         |       |
|---------|----------|---------|-------|
| lfnz    | olfr1156 | NPNT    | ITGA8 |
| lgf1    | olfr1157 | TNC     | ITGA8 |
| lgf2    | olfr1158 | VTN     | ITGA8 |
| lgfals  | olfr116  | ADAM12  | ITGA9 |
| lgfbp1  | olfr1160 | ADAM9   | ITGA9 |
| lgfbp2  | olfr1161 | FIGF    | ITGA9 |
| lgfbp3  | olfr1162 | ITGB1   | ITGA9 |
| lgfbp4  | olfr1163 | SPP1    | ITGA9 |
| lgfbp5  | olfr1164 | TNC     | ITGA9 |
| lgfbp6  | olfr1166 | VCAM1   | ITGA9 |
| lgfbp7  | olfr1167 | CYR61   | ITGAD |
| lgfbpl1 | olfr1168 | PLG     | ITGAD |
| IGFL1   | olfr117  | VCAM1   | ITGAD |
| IGFL2   | olfr1170 | VTN     | ITGAD |
| lgfl3   | olfr1173 | ESM1    | ITGAL |
| IGFL4   | olfr1176 | ICAM1   | ITGAL |
| IGHD    | olfr1178 | ICAM4   | ITGAL |
| IGHG1   | olfr1179 | LGALS8  | ITGAL |
| IGHG2   | olfr118  | LGALS9  | ITGAL |
| IGHG3   | olfr1180 | C3      | ITGAM |
| IGHG4   | olfr1181 | CEACAM8 | ITGAM |
| IGHM    | olfr1182 | CFH     | ITGAM |
| IGIP    | olfr1183 | CLEC4M  | ITGAM |
| lgj     | olfr1184 | ELANE   | ITGAM |
| IGKC    | olfr1186 | FGG     | ITGAM |
| IGKV1-5 | olfr1188 | HP      | ITGAM |
| IGKV4-1 | olfr1189 | ICAM1   | ITGAM |
| IGLC1   | olfr119  | ICAM4   | ITGAM |
| IGLC2   | olfr1193 | JAM3    | ITGAM |
| IGLC3   | olfr1195 | LGALS3  | ITGAM |
| IGLC6   | olfr1196 | PLAUR   | ITGAM |
| IGLC7   | olfr1197 | PRTN3   | ITGAM |
| IGLL1   | olfr1198 | TGFBI   | ITGAM |
| IGLL5   | olfr1199 | ADAM23  | ITGAV |
| lglon5  | olfr12   | ADAM9   | ITGAV |
| IGSF1   | olfr120  | ANGPTL3 | ITGAV |
| IGSF10  | olfr1200 | AZGP1   | ITGAV |
| lgsf21  | olfr1201 | CALR    | ITGAV |
| lhh     | olfr1202 | CD47    | ITGAV |
| ligp1   | olfr1204 | COL4A3  | ITGAV |
| IK      | olfr1205 | CYR61   | ITGAV |
| Il10    | olfr1206 | EDIL3   | ITGAV |
| Il11    | olfr1208 | F2R     | ITGAV |
| Il12a   | olfr1209 | FCER2   | ITGAV |
| IL12B   | olfr121  | FN1     | ITGAV |
| Il13    | olfr1211 | GSN     | ITGAV |
| IL13RA2 | olfr1212 | ICAM4   | ITGAV |

|         |          |          |       |
|---------|----------|----------|-------|
| Il15    | olfr1213 | ITGB1    | ITGAV |
| IL15RA  | olfr1214 | LGALS8   | ITGAV |
| Il16    | olfr1215 | MMP14    | ITGAV |
| Il17a   | olfr1216 | MMP2     | ITGAV |
| Il17b   | olfr1217 | NID1     | ITGAV |
| IL17C   | olfr1218 | NOV      | ITGAV |
| IL17D   | olfr1219 | PLAUR    | ITGAV |
| Il17f   | olfr122  | SPP1     | ITGAV |
| IL17RB  | olfr1220 | TGFB1    | ITGAV |
| IL17RE  | olfr1221 | TGFB3    | ITGAV |
| Il18    | olfr1222 | THBS1    | ITGAV |
| Il18bp  | olfr1223 | VTN      | ITGAV |
| Il19    | olfr1225 | C3       | ITGAX |
| Il1a    | olfr1226 | FCER2    | ITGAX |
| Il1b    | olfr1228 | ICAM4    | ITGAX |
| Il1f10  | olfr1229 | JAM3     | ITGAX |
| Il1f5   | olfr123  | ACTN1    | ITGB1 |
| Il1f6   | olfr1230 | ACTN4    | ITGB1 |
| Il1f8   | olfr1231 | ADAM12   | ITGB1 |
| Il1f9   | olfr1232 | ADAM9    | ITGB1 |
| IL1RAP  | olfr1233 | CD46     | ITGB1 |
| IL1RL1  | olfr1234 | CD47     | ITGB1 |
| IL1RN   | olfr1238 | CHAD     | ITGB1 |
| Il2     | olfr1239 | COL1A1   | ITGB1 |
| Il20    | olfr124  | COL6A3   | ITGB1 |
| Il21    | olfr1240 | EMILIN1  | ITGB1 |
| Il22    | olfr1241 | FBLN1    | ITGB1 |
| IL22RA2 | olfr1242 | FIGF     | ITGB1 |
| Il23a   | olfr1243 | FLNA     | ITGB1 |
| Il24    | olfr1245 | FN1      | ITGB1 |
| IL25    | olfr1246 | HSPG2    | ITGB1 |
| IL26    | olfr1247 | ICAM4    | ITGB1 |
| Il27    | olfr1248 | IGFBP2   | ITGB1 |
| IL28A   | olfr1249 | ITGA6    | ITGB1 |
| Il28b   | olfr125  | LAMA1    | ITGB1 |
| IL29    | olfr1250 | LAMA4    | ITGB1 |
| Il3     | olfr1251 | LGALS1   | ITGB1 |
| Il31    | olfr1252 | LGALS3   | ITGB1 |
| IL32    | olfr1253 | LGALS3BP | ITGB1 |
| Il33    | olfr1254 | LGALS8   | ITGB1 |
| Il34    | olfr1255 | LGALS9   | ITGB1 |
| IL36A   | olfr1256 | LTB      | ITGB1 |
| IL36B   | olfr1257 | NID1     | ITGB1 |
| IL36G   | olfr1258 | NOV      | ITGB1 |
| IL36RN  | olfr1259 | PECAM1   | ITGB1 |
| IL37    | olfr126  | SPARC    | ITGB1 |
| Il4     | olfr1260 | SPP1     | ITGB1 |

|        |          |         |       |
|--------|----------|---------|-------|
| IL4R   | olfr1261 | TGM2    | ITGB1 |
| IL5    | olfr1262 | THBS1   | ITGB1 |
| IL5RA  | olfr1263 | THBS2   | ITGB1 |
| IL6    | olfr1264 | TLN1    | ITGB1 |
| IL6R   | olfr1265 | TNC     | ITGB1 |
| IL6ST  | olfr1269 | VCAM1   | ITGB1 |
| IL7    | olfr127  | VCAN    | ITGB1 |
| IL7R   | olfr1270 | VEGFB   | ITGB1 |
| IL8    | olfr1271 | C3      | ITGB2 |
| IL9    | olfr1272 | CD14    | ITGB2 |
| IL9R   | olfr1275 | ESM1    | ITGB2 |
| IMPG1  | olfr1276 | FCER2   | ITGB2 |
| IMPG2  | olfr1277 | HP      | ITGB2 |
| Inha   | olfr1278 | ICAM1   | ITGB2 |
| Inhba  | olfr1279 | ICAM4   | ITGB2 |
| Inhbb  | olfr128  | KNG1    | ITGB2 |
| Inhbc  | olfr1280 | PLAUR   | ITGB2 |
| Inhbe  | olfr1281 | PRTN3   | ITGB2 |
| INS    | olfr1282 | TLN1    | ITGB2 |
| Ins1   | olfr1283 | ADAM23  | ITGB3 |
| Ins2   | olfr1284 | ANGPTL3 | ITGB3 |
| Ins13  | olfr1285 | CD47    | ITGB3 |
| INSL4  | olfr1286 | COL1A2  | ITGB3 |
| Ins15  | olfr1287 | COL4A3  | ITGB3 |
| Ins16  | olfr1288 | COL6A3  | ITGB3 |
| Irgm2  | olfr1289 | CTSG    | ITGB3 |
| Isg15  | olfr129  | F2      | ITGB3 |
| Islr   | olfr1290 | FBLN2   | ITGB3 |
| Ism1   | olfr1294 | FCER2   | ITGB3 |
| ISM2   | olfr1295 | FGA     | ITGB3 |
| Itfg1  | olfr1297 | FGG     | ITGB3 |
| ITGA6  | olfr1298 | FLNA    | ITGB3 |
| ITGB1  | olfr1299 | FN1     | ITGB3 |
| ITGBL1 | olfr13   | GSN     | ITGB3 |
| Itih1  | olfr130  | ITGB1   | ITGB3 |
| Itih2  | olfr1301 | LAMA4   | ITGB3 |
| Itih3  | olfr1302 | NID1    | ITGB3 |
| ITIH4  | olfr1303 | NOV     | ITGB3 |
| Itih5  | olfr1305 | PECAM1  | ITGB3 |
| ITIH5L | olfr1306 | SPP1    | ITGB3 |
| Itln1  | olfr1307 | TGM2    | ITGB3 |
| ITLN2  | olfr1308 | THBS1   | ITGB3 |
| Itlnb  | olfr1309 | TLN1    | ITGB3 |
| ITM2B  | olfr131  | VTN     | ITGB3 |
| IZUMO4 | olfr1310 | CLCA2   | ITGB4 |
| JAG1   | olfr1311 | COL17A1 | ITGB4 |
| Jam3   | olfr1312 | EGFR    | ITGB4 |



|          |          |          |        |
|----------|----------|----------|--------|
| KAL1     | olfr1313 | ERBB2IP  | ITGB4  |
| Kap      | olfr1314 | FLNA     | ITGB4  |
| KARS     | olfr1316 | ITGA6    | ITGB4  |
| Kazald1  | olfr1317 | LAMA5    | ITGB4  |
| Kcp      | olfr1318 | LAMB1    | ITGB4  |
| KDSR     | olfr132  | LAMB2    | ITGB4  |
| Kera     | olfr1320 | LAMC1    | ITGB4  |
| KGFLP1   | olfr1321 | LGALS3   | ITGB4  |
| KGFLP2   | olfr1322 | MET      | ITGB4  |
| KIAA0100 | olfr1323 | ADAM9    | ITGB5  |
| KIAA0564 | olfr1324 | ALB      | ITGB5  |
| KIR3DP1  | olfr1325 | ANXA5    | ITGB5  |
| KIR3DX1  | olfr1328 | CYR61    | ITGB5  |
| Kirrel3  | olfr1329 | FLNA     | ITGB5  |
| Kiss1    | olfr133  | ICAM4    | ITGB5  |
| KIT      | olfr1330 | ITGB1    | ITGB5  |
| Kitl     | olfr1331 | LTBP1    | ITGB5  |
| KITLG    | olfr1333 | LTBP3    | ITGB5  |
| Kl       | olfr1335 | PLAUR    | ITGB5  |
| Klhl11   | olfr1336 | SPP1     | ITGB5  |
| KLK10    | olfr1337 | TLN1     | ITGB5  |
| Klk11    | olfr1338 | VTN      | ITGB5  |
| KLK12    | olfr1339 | FLNA     | ITGB6  |
| Klk13    | olfr134  | FN1      | ITGB6  |
| Klk14    | olfr1340 | SPP1     | ITGB6  |
| KLK15    | olfr1341 | TGFB1    | ITGB6  |
| Klk1b21  | olfr1342 | TGFB3    | ITGB6  |
| KLK3     | olfr1344 | TNC      | ITGB6  |
| KLK4     | olfr1346 | FLNA     | ITGB7  |
| KLK5     | olfr1347 | FN1      | ITGB7  |
| Klk6     | olfr1348 | TLN1     | ITGB7  |
| Klk7     | olfr1349 | VCAM1    | ITGB7  |
| Klk8     | olfr135  | MMP14    | ITGB8  |
| KLK9     | olfr1350 | TGFB1    | ITGB8  |
| Klkb1    | olfr1351 | VTN      | ITGB8  |
| Kng1     | olfr1352 | ANXA5    | KDR    |
| KRTAP1-1 | olfr1353 | COL18A1  | KDR    |
| KRTAP1-3 | olfr1354 | FIGF     | KDR    |
| KRTAP5-8 | olfr1355 | FLT1     | KDR    |
| Krtdap   | olfr1356 | HSP90AA1 | KDR    |
| LACRT    | olfr1357 | NRP1     | KDR    |
| Lad1     | olfr1358 | TIMP3    | KDR    |
| LAIR2    | olfr1359 | VEGFA    | KDR    |
| Lalba    | olfr136  | VEGFC    | KDR    |
| Lama1    | olfr1360 | KISS1    | KISS1R |
| Lama2    | olfr1361 | CSF2RA   | KIT    |
| Lama3    | olfr1362 | EPOR     | KIT    |

|          |          |         |          |
|----------|----------|---------|----------|
| Lama4    | olfr1364 | KITLG   | KIT      |
| Lama5    | olfr1366 | MICA    | KLRK1    |
| Lamb1    | olfr1367 | ULBP2   | KLRK1    |
| Lamb2    | olfr1368 | APOB    | LDLR     |
| Lamb3    | olfr137  | APOE    | LDLR     |
| LAMB4    | olfr1370 | FLT1    | LDLR     |
| Lamc1    | olfr1371 | HSPA5   | LDLR     |
| Lamc2    | olfr1373 | PCSK9   | LDLR     |
| Lamc3    | olfr1377 | PF4     | LDLR     |
| Lao1     | olfr1378 | APOD    | LEPR     |
| LATH     | olfr138  | CLU     | LEPR     |
| Lbp      | olfr1380 | LEP     | LEPR     |
| Lcat     | olfr1381 | CD14    | LGALS3BP |
| LCN1     | olfr1382 | CD248   | LGALS3BP |
| Lcn10    | olfr1383 | COL5A1  | LGALS3BP |
| Lcn12    | olfr1384 | COL6A1  | LGALS3BP |
| Lcn13    | olfr1385 | FN1     | LGALS3BP |
| LCN15    | olfr1386 | ITGB1   | LGALS3BP |
| LCN1P1   | olfr1387 | LGALS1  | LGALS3BP |
| Lcn2     | olfr1388 | LGALS3  | LGALS3BP |
| Lcn3     | olfr1389 | NID1    | LGALS3BP |
| Lcn4     | olfr139  | VCL     | LGALS3BP |
| Lcn5     | olfr1390 | CGA     | LHCGR    |
| LCN6     | olfr1391 | GNAS    | LHCGR    |
| Lcn8     | olfr1392 | LHB     | LHCGR    |
| Lcn9     | olfr1393 | CNTF    | LIFR     |
| LDLR     | olfr1394 | CTF1    | LIFR     |
| Leap2    | olfr1395 | IL6ST   | LIFR     |
| Lect1    | olfr1396 | LIF     | LIFR     |
| Lect2    | olfr140  | OSM     | LIFR     |
| Lefty1   | olfr1402 | B2M     | LILRB1   |
| Lefty2   | olfr1404 | LCN1    | LMBR1L   |
| Lep      | olfr1406 | SCGB1A1 | LMBR1L   |
| LEPR     | olfr1408 | EGFL7   | LOXL2    |
| Lepre1   | olfr141  | EGFL7   | LOXL3    |
| Leprel1  | olfr1410 | COL2A1  | LOXL4    |
| LFNG     | olfr1411 | EGFL7   | LOXL4    |
| Lgals1   | olfr1412 | A2M     | LRP1     |
| Lgals3   | olfr1413 | APOE    | LRP1     |
| LGALS3BP | olfr1414 | APP     | LRP1     |
| LGALS7   | olfr1415 | C3      | LRP1     |
| LGALS8   | olfr1416 | C4BPA   | LRP1     |
| Lgals9   | olfr1417 | CALR    | LRP1     |
| Lgi1     | olfr1418 | CTGF    | LRP1     |
| Lgi2     | olfr1419 | CTSG    | LRP1     |
| Lgi3     | olfr142  | ELANE   | LRP1     |
| Lgi4     | olfr1420 | F8      | LRP1     |

|           |          |
|-----------|----------|
| LHB       | olfr1423 |
| LHCGR     | olfr1424 |
| LIBC      | olfr1425 |
| Lif       | olfr1426 |
| LIFR      | olfr1427 |
| LILRA3    | olfr1428 |
| LILRA5    | olfr143  |
| LINC00305 | olfr1431 |
| Lipc      | olfr1432 |
| Lipe      | olfr1433 |
| Lipf      | olfr1434 |
| Lipg      | olfr1436 |
| Liph      | olfr1437 |
| Lipi      | olfr1440 |
| Lipk      | olfr1441 |
| Lipm      | olfr1442 |
| Lipn      | olfr1443 |
| Lmcd1     | olfr1444 |
| LNPEP     | olfr1445 |
| Lox       | olfr1446 |
| Loxl1     | olfr1447 |
| LOXL2     | olfr1448 |
| LOXL3     | olfr1449 |
| LOXL4     | olfr145  |
| LPA       | olfr1450 |
| LPAL2     | olfr1451 |
| Lpl       | olfr1453 |
| LPO       | olfr1454 |
| Lrch3     | olfr1457 |
| LRG1      | olfr1458 |
| LRP2      | olfr1459 |
| LRP8      | olfr146  |
| Lrrc17    | olfr1461 |
| LRSAM1    | olfr1462 |
| LSR       | olfr1463 |
| Lta       | olfr1465 |
| Ltb       | olfr1466 |
| Ltbp1     | olfr1467 |
| Ltbp2     | olfr1469 |
| Ltbp3     | olfr147  |
| Ltbp4     | olfr1471 |
| Ltf       | olfr1472 |
| Lum       | olfr1474 |
| Luzp2     | olfr1475 |
| Ly6g5b    | olfr1477 |
| Ly6g5c    | olfr148  |
| Ly6k      | olfr1480 |

|          |       |
|----------|-------|
| F9       | LRP1  |
| FURIN    | LRP1  |
| LIPC     | LRP1  |
| LPL      | LRP1  |
| LTF      | LRP1  |
| MDK      | LRP1  |
| MMP13    | LRP1  |
| MMP14    | LRP1  |
| MMP15    | LRP1  |
| MMP16    | LRP1  |
| MMP17    | LRP1  |
| MMP9     | LRP1  |
| PDGFB    | LRP1  |
| PLAT     | LRP1  |
| PLAUR    | LRP1  |
| SERPINA1 | LRP1  |
| SERPINE1 | LRP1  |
| THBS1    | LRP1  |
| TIMP1    | LRP1  |
| TLN1     | LRP1  |
| VCL      | LRP1  |
| WNT3A    | LRP1  |
| HTRA1    | LRP10 |
| ACTN2    | LRP12 |
| APP      | LRP1B |
| PLAT     | LRP1B |
| PLAUR    | LRP1B |
| SERPINE1 | LRP1B |
| ALB      | LRP2  |
| APOB     | LRP2  |
| APOE     | LRP2  |
| APOH     | LRP2  |
| CLU      | LRP2  |
| GC       | LRP2  |
| INS      | LRP2  |
| LCN2     | LRP2  |
| LPA      | LRP2  |
| LPL      | LRP2  |
| MDK      | LRP2  |
| PLAU     | LRP2  |
| SCGB1A1  | LRP2  |
| SERPINE1 | LRP2  |
| TG       | LRP2  |
| TLN1     | LRP2  |
| TTR      | LRP2  |
| DKK1     | LRP5  |
| THBS1    | LRP5  |

|        |          |         |       |
|--------|----------|---------|-------|
| Ly86   | olfr1484 | WNT1    | LRP5  |
| LY96   | olfr1487 | ANTXR2  | LRP6  |
| Lyg1   | olfr1489 | DKK1    | LRP6  |
| Lyg2   | olfr149  | DKK2    | LRP6  |
| Lypd6  | olfr1490 | WNT1    | LRP6  |
| LYZ    | olfr1491 | WNT3A   | LRP6  |
| Lyz1   | olfr1494 | APOE    | LRP8  |
| Lyz2   | olfr1495 | APOH    | LRP8  |
| Lyzl1  | olfr1496 | CLU     | LRP8  |
| LYZL2  | olfr1497 | RELN    | LRP8  |
| Lyzl4  | olfr1499 | VCL     | LRRN2 |
| Lyzl6  | olfr15   | FBN1    | LTBP1 |
| MAGP2  | olfr150  | FBN2    | LTBP1 |
| Mamdc2 | olfr1500 | FN1     | LTBP1 |
| Man2b2 | olfr1501 | IGFBP3  | LTBP1 |
| Manf   | olfr1502 | TGM2    | LTBP1 |
| MAP2K2 | olfr1504 | IGHG1   | LTBP4 |
| MAPK15 | olfr1505 | TGFB1   | LTBP4 |
| MARCO  | olfr1506 | LTA     | LTBR  |
| Masp1  | olfr1507 | LTB     | LTBR  |
| Masp2  | olfr1508 | TNF     | LTBR  |
| Matn1  | olfr1509 | TNFSF14 | LTBR  |
| Matn2  | olfr151  | LY86    | LY96  |
| Matn3  | olfr1510 | MBL2    | LY96  |
| Matn4  | olfr1511 | S100A8  | LY96  |
| Mbl1   | olfr1512 | SFTPA1  | LY96  |
| Mbl2   | olfr1513 | SFTPA2  | LY96  |
| Mcfd2  | olfr152  | SFTPD   | LY96  |
| Mcpt1  | olfr153  | REN     | M6PR  |
| Mcpt8  | olfr1535 | SCGB3A1 | MARCO |
| Mdk    | olfr154  | SCGB3A2 | MARCO |
| Megf6  | olfr155  | AGT     | MAS1  |
| MEP1A  | olfr156  | ASIP    | MC1R  |
| MEP1B  | olfr157  | POMC    | MC1R  |
| Mepe   | olfr159  | ASIP    | MC2R  |
| MET    | olfr16   | POMC    | MC2R  |
| Metrn  | olfr160  | AGRP    | MC3R  |
| Metrnl | olfr161  | ASIP    | MC3R  |
| MFAP1  | olfr164  | AGRP    | MC4R  |
| Mfap1a | olfr165  | ASIP    | MC4R  |
| Mfap2  | olfr166  | NPY     | MC4R  |
| Mfap4  | olfr167  | POMC    | MC4R  |
| Mfap5  | olfr168  | AGRP    | MC5R  |
| Mfge8  | olfr169  | ASIP    | MC5R  |
| Mfi2   | olfr17   | POMC    | MC5R  |
| MFNG   | olfr170  | AIMP1   | MCC   |
| Mgat4a | olfr171  | AKR1B1  | MCC   |

Mgp  
MIA  
Mia1  
Mia2  
MICA  
Mif  
mifr-2  
MLN  
Mmel1  
MMP1  
Mmp10  
Mmp11  
Mmp12  
Mmp13  
Mmp14  
Mmp15  
Mmp16  
Mmp17  
Mmp19  
Mmp1a  
Mmp2  
Mmp20  
Mmp21  
Mmp23  
MMP23B  
Mmp24  
Mmp25  
MMP26  
MMP27  
MMP28  
Mmp3  
Mmp7  
Mmp8  
Mmp9  
Mmrn1  
Mmrn2  
Mpo  
MR1  
Msln  
Msemb  
Msmg  
MSR1  
Mst1  
MST1P9  
Mstn  
MT-RNR2  
MTRNR2L1

olfr172  
olfr173  
olfr176  
olfr177  
olfr178  
olfr179  
olfr18  
olfr180  
olfr181  
olfr183  
olfr186  
olfr187  
olfr19  
olfr190  
olfr191  
olfr192  
olfr193  
olfr194  
olfr195  
olfr196  
olfr197  
olfr198  
olfr199  
olfr2  
olfr20  
olfr201  
olfr202  
olfr203  
olfr204  
olfr205  
olfr206  
olfr207  
olfr208  
olfr209  
olfr211  
olfr212  
olfr213  
olfr214  
olfr215  
olfr218  
olfr220  
olfr221  
olfr222  
olfr223  
olfr224  
olfr225  
olfr228

ANXA2 MCC  
CAPZA1 MCC  
ERBB2IP MCC  
MAP2K2 MCC  
PNP MCC  
SMC3 MCC  
TFRC MCC  
PMCH MCHR1  
PMCH MCHR2  
IGFBP1 MED1  
ACTN1 MED14  
ACTN2 MED14  
IGFBP1 MED14  
ISG15 MED14  
UACA MED14  
GAS6 MERTK  
MSR1 MERTK  
EGFR MET  
FAS MET  
HGF MET  
HGFAC MET  
PLXNB1 MET  
GHRL MLNR  
MLN MLNR  
THPO MPL  
SIGLEC1 MRC1  
CORT MRGPRX2  
EPOR MST1R  
MST1 MST1R  
SFN MST1R  
CALR MTNR1A  
CNP MTNR1A  
FLNA MTNR1A  
HSPA5 MTNR1A  
COPA MTNR1B  
FLNA MTNR1B  
HSPA5 MTNR1B  
COLQ MUSK  
CD59 NCR1  
CD59 NCR3  
NTN1 NEO1  
NTN3 NEO1  
NTN4 NEO1  
BDNF NGFR  
IL2 NGFR  
NGF NGFR  
NTF4 NGFR

|           |         |        |        |
|-----------|---------|--------|--------|
| MTRNR2L10 | olfr229 | NMB    | NMBR   |
| MTRNR2L2  | olfr23  | NMS    | NMUR1  |
| MTRNR2L3  | olfr231 | NMU    | NMUR1  |
| MTRNR2L4  | olfr235 | NMS    | NMUR2  |
| MTRNR2L5  | olfr238 | NMU    | NMUR2  |
| MTRNR2L6  | olfr239 | ADAM17 | NOTCH1 |
| MTRNR2L7  | olfr24  | DLL1   | NOTCH1 |
| MTRNR2L8  | olfr242 | FURIN  | NOTCH1 |
| MTRNR2L9  | olfr243 | JAG1   | NOTCH1 |
| MUC1      | olfr247 | LFNG   | NOTCH1 |
| Muc13     | olfr248 | MFNG   | NOTCH1 |
| MUC15     | olfr25  | NOV    | NOTCH1 |
| MUC16     | olfr250 | PRF1   | NOTCH1 |
| MUC17     | olfr251 | RBP3   | NOTCH1 |
| Muc19     | olfr255 | TNF    | NOTCH1 |
| Muc2      | olfr256 | DLK1   | NOTCH2 |
| Muc20     | olfr257 | DLL1   | NOTCH2 |
| MUC3A     | olfr259 | JAG1   | NOTCH2 |
| Muc4      | olfr26  | LFNG   | NOTCH2 |
| Muc5ac    | olfr262 | MFNG   | NOTCH2 |
| MUC5B     | olfr263 | MYOC   | NOTCH2 |
| Muc6      | olfr266 | DLL1   | NOTCH3 |
| MUC7      | olfr267 | JAG1   | NOTCH3 |
| MUCL1     | olfr27  | NPB    | NPBWR1 |
| Mug1      | olfr270 | NPW    | NPBWR1 |
| Mug2      | olfr272 | NPB    | NPBWR2 |
| Mup20     | olfr273 | NPW    | NPBWR2 |
| Mup3      | olfr275 | NPFF   | NPFFR1 |
| Mup4      | olfr279 | HCRT   | NPFFR2 |
| MXRA5     | olfr281 | NPFF   | NPFFR2 |
| Myoc      | olfr282 | NPY    | NPFFR2 |
| Napsa     | olfr283 | NPPA   | NPR1   |
| Nav2      | olfr284 | NPPB   | NPR1   |
| Nbl1      | olfr285 | SEMA3A | NPR1   |
| NCAM1     | olfr286 | NPPA   | NPR2   |
| Ncan      | olfr287 | NPPB   | NPR2   |
| Ndfip1    | olfr288 | NPPC   | NPR2   |
| NDNF      | olfr290 | NPPA   | NPR3   |
| Ndp       | olfr291 | NPPB   | NPR3   |
| Nell1     | olfr292 | NPPC   | NPR3   |
| Nell2     | olfr293 | NPTX2  | NPTXR  |
| Nenf      | olfr294 | GHRL   | NPY    |
| Nepn      | olfr295 | MEP1A  | NPY    |
| NETO1     | olfr297 | MEP1B  | NPY    |
| Ngf       | olfr298 | NPFF   | NPY    |
| NGFR      | olfr299 | PMCH   | NPY    |
| Ngrn      | olfr3   | NPY    | NPY1R  |

|          |         |          |       |
|----------|---------|----------|-------|
| NHLRC3   | olfr30  | PYY      | NPY1R |
| Nid1     | olfr301 | NPY      | NPY2R |
| Nid2     | olfr302 | PYY      | NPY2R |
| Nmb      | olfr303 | NPY      | NPY5R |
| Nms      | olfr304 | PYY      | NPY5R |
| Nmu      | olfr305 | ACTN1    | NR1H3 |
| Nodal    | olfr307 | HSP90AA1 | NR2C2 |
| Nog      | olfr308 | PEBP1    | NR2C2 |
| NOTCH1   | olfr309 | ERBB2IP  | NR2E1 |
| NOTCH2   | olfr31  | ANGPTL1  | NR2F6 |
| NOTCH2NL | olfr310 | ADA      | NR3C1 |
| NOTCH3   | olfr311 | CALR     | NR3C1 |
| NOTCH4   | olfr312 | GZMA     | NR3C1 |
| Notum    | olfr313 | HMGB1    | NR3C1 |
| Nov      | olfr314 | HMGB2    | NR3C1 |
| Npb      | olfr315 | HSP90AA1 | NR3C1 |
| Npc2     | olfr316 | HSPD1    | NR3C1 |
| Npff     | olfr317 | IDE      | NR3C1 |
| NPIPL1   | olfr318 | IGFBP1   | NR3C1 |
| NPIPL2   | olfr319 | IL8      | NR3C1 |
| Npnt     | olfr32  | MAPK15   | NR3C1 |
| NPPA     | olfr320 | MMP1     | NR3C1 |
| Nppb     | olfr323 | MMP13    | NR3C1 |
| Nppc     | olfr324 | SFN      | NR3C1 |
| Nps      | olfr325 | TGFB1I1  | NR3C1 |
| Nptx2    | olfr328 | TXN      | NR3C1 |
| NPTXR    | olfr33  | HSP90AA1 | NR3C2 |
| Npvf     | olfr330 | LHB      | NR5A1 |
| NPW      | olfr331 | ERBB3    | NRG2  |
| Npy      | olfr332 | ACTN2    | NRIP1 |
| Nrg1     | olfr338 | FGF1     | NRP1  |
| NRG2     | olfr339 | FGF2     | NRP1  |
| Nrg3     | olfr340 | FGF4     | NRP1  |
| Nrg4     | olfr341 | FGF7     | NRP1  |
| NRP1     | olfr342 | FGFR1    | NRP1  |
| Nrtn     | olfr344 | FLT1     | NRP1  |
| Ntf3     | olfr345 | PGF      | NRP1  |
| NTF4     | olfr346 | SEMA3A   | NRP1  |
| Ntf5     | olfr347 | SEMA3B   | NRP1  |
| Ntm      | olfr348 | SEMA3C   | NRP1  |
| Ntn1     | olfr350 | SEMA3D   | NRP1  |
| Ntn3     | olfr351 | SEMA3F   | NRP1  |
| Ntn4     | olfr352 | VEGFA    | NRP1  |
| Ntn5     | olfr353 | VEGFB    | NRP1  |
| Nts      | olfr354 | FLT1     | NRP2  |
| NUCB1    | olfr355 | NRP1     | NRP2  |
| NUCB2    | olfr356 | PGF      | NRP2  |

|         |         |          |         |
|---------|---------|----------|---------|
| Nxph1   | olfr357 | SEMA3B   | NRP2    |
| Nxph2   | olfr358 | SEMA3C   | NRP2    |
| Nxph3   | olfr360 | SEMA3F   | NRP2    |
| NXPH4   | olfr361 | VEGFA    | NRP2    |
| Nyx     | olfr362 | NXPH1    | NRXN1   |
| OBP2A   | olfr365 | NXPH2    | NRXN1   |
| OBP2B   | olfr366 | NXPH3    | NRXN1   |
| Oc90    | olfr368 | PDZD2    | NRXN1   |
| Odam    | olfr370 | KLK3     | NTRK1   |
| ODZ1    | olfr371 | NGF      | NTRK1   |
| Ogn     | olfr372 | NGFR     | NTRK1   |
| Oit1    | olfr373 | NTF3     | NTRK1   |
| Olfm1   | olfr374 | BDNF     | NTRK2   |
| Olfm2   | olfr376 | NGFR     | NTRK2   |
| Olfm3   | olfr378 | NTF3     | NTRK2   |
| Olfm4   | olfr38  | NTF4     | NTRK2   |
| OLFML1  | olfr380 | NGFR     | NTRK3   |
| Olfml2a | olfr381 | NTF3     | NTRK3   |
| Olfml2b | olfr382 | NTS      | NTSR1   |
| Olfml3  | olfr384 | NTS      | NTSR2   |
| OLR1    | olfr385 | PNOC     | OPRL1   |
| Omd     | olfr389 | FLNA     | OPRM1   |
| Oosp1   | olfr39  | OBP2A    | OR1G1   |
| Opc     | olfr390 | ALB      | OR2T6   |
| Orm1    | olfr392 | ALB      | OR3A2   |
| Orm2    | olfr393 | IGHM     | OR5H6   |
| OSCAR   | olfr394 | ALB      | OR8D2   |
| Osm     | olfr395 | IGHG1    | OR8D2   |
| Ostn    | olfr397 | IL6ST    | OSMR    |
| Otoa    | olfr398 | OSM      | OSMR    |
| Otog    | olfr399 | AVP      | OXTR    |
| Otol1   | olfr401 | OXT      | OXTR    |
| Otop1   | olfr402 | CAMP     | P2RX7   |
| Otor    | olfr403 | CD47     | P2RY2   |
| Otos    | olfr410 | PDGFA    | PDGFRA  |
| OVCH1   | olfr411 | PDGFB    | PDGFRA  |
| Ovch2   | olfr412 | PDGFC    | PDGFRA  |
| OVOS1   | olfr414 | COPA     | PDGFRB  |
| OVOS2   | olfr417 | EGFR     | PDGFRB  |
| Oxt     | olfr419 | PDAP1    | PDGFRB  |
| P4ha2   | olfr420 | PDGFB    | PDGFRB  |
| P4HA3   | olfr421 | PDGFD    | PDGFRB  |
| P4HB    | olfr424 | PGLYRP4  | PGLYRP3 |
| PAEP    | olfr426 | PGLYRP3  | PGLYRP4 |
| PAM     | olfr427 | HMGB1    | PGR     |
| Pamr1   | olfr429 | HMGB2    | PGR     |
| PAPL    | olfr43  | HSP90AA1 | PGR     |



|          |         |          |        |
|----------|---------|----------|--------|
| Papln    | olfr430 | CALR     | PGRMC1 |
| Pappa    | olfr432 | P4HB     | PGRMC1 |
| PAPPA2   | olfr433 | TIMP2    | PGRMC1 |
| PATE1    | olfr434 | COPA     | PHB2   |
| Pate2    | olfr435 | FLRT3    | PHB2   |
| PATE3    | olfr437 | GRIN2B   | PHB2   |
| Pate4    | olfr44  | LGALS3BP | PHB2   |
| Pbsn     | olfr441 | YBX1     | PHB2   |
| Pcdh15   | olfr444 | FCAR     | PILRA  |
| PCDHA1   | olfr446 | IL6ST    | PLAUR  |
| PCDHA10  | olfr447 | KNG1     | PLAUR  |
| PCDHA6   | olfr448 | MMP12    | PLAUR  |
| Pcolce   | olfr449 | PLAU     | PLAUR  |
| Pcolce2  | olfr45  | SERPINE1 | PLAUR  |
| Pcsk1    | olfr450 | VTN      | PLAUR  |
| Pcsk1n   | olfr452 | NRP1     | PLXNA1 |
| Pcsk2    | olfr453 | PLXNB1   | PLXNA1 |
| Pcsk5    | olfr455 | MET      | PLXNB1 |
| Pcsk6    | olfr456 | PTN      | PLXNB2 |
| Pcsk9    | olfr457 | SPOCK2   | PLXNB3 |
| Pcyox1   | olfr458 | NRP1     | PLXND1 |
| Pcyox1l  | olfr459 | SEMA3E   | PLXND1 |
| Pdap1    | olfr46  | HSP90AA1 | PPARA  |
| PDCD1LG2 | olfr460 | PEBP1    | PPARD  |
| Pddc1    | olfr461 | NPY      | PPYR1  |
| Pdgfa    | olfr462 | PPY      | PPYR1  |
| Pdgfb    | olfr463 | PYY      | PPYR1  |
| Pdgfc    | olfr464 | PRLH     | PRLHR  |
| Pdgfd    | olfr466 | GH1      | PRLR   |
| Pdgfrl   | olfr467 | PPIA     | PRLR   |
| PDYN     | olfr469 | PRL      | PRLR   |
| PDZD11   | olfr47  | PROC     | PROCR  |
| Pdzd2    | olfr470 | DHH      | PTCH1  |
| Pebp1    | olfr471 | IHH      | PTCH1  |
| Pecam1   | olfr472 | SHH      | PTCH1  |
| Penk     | olfr473 | DHH      | PTCH2  |
| Pf4      | olfr474 | IHH      | PTCH2  |
| PF4V1    | olfr476 | SHH      | PTCH2  |
| PFN1     | olfr477 | CA2      | PTCHD2 |
| PGA4     | olfr478 | GNAS     | PTGDR  |
| Pgc      | olfr479 | PTGDS    | PTGER1 |
| Pgcp     | olfr48  | PTGFR    | PTGER1 |
| Pgf      | olfr480 | PTGDS    | PTGER2 |
| PGLYRP1  | olfr481 | PTGFR    | PTGER2 |
| PGLYRP2  | olfr482 | PTGDS    | PTGFR  |
| PGLYRP3  | olfr483 | GNAS     | PTGIR  |
| PGLYRP4  | olfr484 | PTH      | PTH1R  |

|          |         |        |         |
|----------|---------|--------|---------|
| Pi15     | olfr485 | PTHLH  | PTH1R   |
| Pi16     | olfr486 | PTH    | PTH2R   |
| PI3      | olfr487 | CHL1   | PTPRA   |
| Pigr     | olfr488 | GHR    | PTPRB   |
| PILRA    | olfr49  | LGALS1 | PTPRB   |
| Pip      | olfr490 | MET    | PTPRB   |
| PKHD1L1  | olfr491 | TNC    | PTPRB   |
| Pla1a    | olfr492 | CD2    | PTPRC   |
| Pla2g10  | olfr493 | CD8A   | PTPRC   |
| Pla2g12a | olfr494 | DPP4   | PTPRC   |
| PLA2G12B | olfr495 | FCGR3A | PTPRC   |
| Pla2g15  | olfr497 | LGALS1 | PTPRC   |
| Pla2g1b  | olfr498 | LGALS3 | PTPRC   |
| Pla2g2a  | olfr5   | MBL2   | PTPRC   |
| Pla2g2c  | olfr50  | PAEP   | PTPRC   |
| Pla2g2d  | olfr502 | CD8A   | PTPRCAP |
| Pla2g2e  | olfr503 | TLN1   | PTPRE   |
| Pla2g2f  | olfr504 | GALNT1 | PTPRF   |
| PLA2G3   | olfr506 | GRIA3  | PTPRF   |
| PLA2G4B  | olfr507 | LAMA1  | PTPRF   |
| Pla2g5   | olfr508 | LAMB1  | PTPRF   |
| Pla2g7   | olfr509 | LAMC1  | PTPRF   |
| PLA2R1   | olfr51  | NID1   | PTPRF   |
| Plac1    | olfr510 | GHR    | PTPRH   |
| Plac1l   | olfr512 | EGFR   | PTPRJ   |
| PLAC9    | olfr513 | MET    | PTPRJ   |
| Plat     | olfr514 | PCSK5  | PTPRM   |
| Plau     | olfr516 | PPIA   | PTPRN   |
| PLAUR    | olfr517 | KIT    | PTPRO   |
| Plbd1    | olfr518 | EGFR   | PTPRS   |
| PLEK     | olfr519 | PTN    | PTPRS   |
| Plg      | olfr52  | RAB35  | PTPRS   |
| PLGLA    | olfr520 | KIT    | PTPRU   |
| PLGLB2   | olfr521 | HMGB1  | PTPRZ1  |
| PLIN2    | olfr522 | MDK    | PTPRZ1  |
| Plod1    | olfr523 | PTN    | PTPRZ1  |
| PLOD2    | olfr524 | TNR    | PTPRZ1  |
| PLSCR1   | olfr525 | PVRL1  | PVR     |
| Pltp     | olfr527 | VTN    | PVR     |
| PLXDC1   | olfr53  | PVR    | PVRL1   |
| PLXNB1   | olfr530 | PVRL4  | PVRL1   |
| Pm20d1   | olfr531 | PVRL1  | PVRL4   |
| Pmch     | olfr532 | CALCA  | RAMP1   |
| PMCHL1   | olfr533 | IAPP   | RAMP1   |
| PMEL     | olfr535 | ADM    | RAMP2   |
| Pnlip    | olfr536 | CALCA  | RAMP2   |
| Pnliprp1 | olfr538 | IAPP   | RAMP2   |

|          |         |         |        |
|----------|---------|---------|--------|
| Pnliprp2 | olfr539 | RAMP1   | RAMP2  |
| PNLIPRP3 | olfr54  | ADM     | RAMP3  |
| Pnoc     | olfr541 | GDNF    | RET    |
| Pnp      | olfr543 | GFRA4   | RET    |
| Podn     | olfr544 | NRTN    | RET    |
| Podnl1   | olfr545 | PSPN    | RET    |
| Pomc     | olfr547 | SLIT1   | ROBO1  |
| Pon1     | olfr549 | SLIT2   | ROBO1  |
| Pon2     | olfr55  | CPE     | ROBO2  |
| Pon3     | olfr550 | OLFM2   | ROBO2  |
| Postn    | olfr551 | SLIT2   | ROBO2  |
| POTEKP   | olfr552 | SLIT3   | ROBO2  |
| PPBP     | olfr553 | APOA1   | ROBO3  |
| PPBPL2   | olfr554 | SLIT2   | ROBO4  |
| PPIA     | olfr555 | NGF     | ROR1   |
| Ppt1     | olfr556 | WNT5A   | ROR1   |
| Ppy      | olfr557 | WNT5A   | ROR2   |
| PRADC1   | olfr558 | IL17A   | RORC   |
| Prap1    | olfr559 | EGFR    | ROS1   |
| PRB1     | olfr56  | NGFR    | RTN4R  |
| PRB2     | olfr560 | RLN1    | RXFP1  |
| PRB3     | olfr561 | RLN2    | RXFP1  |
| PRB4     | olfr564 | RLN3    | RXFP1  |
| Prdx4    | olfr566 | INSL3   | RXFP2  |
| Prelp    | olfr568 | RLN2    | RXFP2  |
| Prf1     | olfr569 | KNG1    | RXFP4  |
| PRG2     | olfr57  | RLN3    | RXFP4  |
| PRG4     | olfr570 | CCL6    | RXRA   |
| PRH2     | olfr571 | CCL9    | RXRA   |
| PrI      | olfr572 | CTSL1   | RXRA   |
| Prl2a1   | olfr574 | IGFBP3  | RXRA   |
| Prl2b1   | olfr575 | CHGB    | RXRG   |
| Prl2c2   | olfr576 | LRSAM1  | RXRG   |
| Prl2c3   | olfr577 | WNT1    | RYK    |
| Prl2c5   | olfr578 | WNT3A   | RYK    |
| Prl3b1   | olfr58  | ADAM23  | RYR1   |
| Prl3c1   | olfr582 | PTN     | RYR1   |
| Prl3d1   | olfr583 | TF      | RYR1   |
| Prl4a1   | olfr584 | ALB     | RYR2   |
| Prl5a1   | olfr585 | RS1     | SARM1  |
| Prl6a1   | olfr586 | APOA1   | SCARB1 |
| Prl7a1   | olfr589 | APOE    | SCARB1 |
| Prl7a2   | olfr59  | THBS1   | SCARB2 |
| Prl7b1   | olfr591 | CALR    | SCARF1 |
| Prl7c1   | olfr592 | ADCYAP1 | SCTR   |
| Prl7d1   | olfr593 | CPAMD8  | SCTR   |
| Prl8a6   | olfr594 | SCT     | SCTR   |

Prl8a8  
Prl8a9  
PRLH  
PRLR  
PRNT  
PRO2829  
Proc  
Prok1  
Prok2  
PROL1  
Prom1  
Prom2  
Pros1  
Proz  
PRR4  
PRRG1  
Prrg2  
Prrg3  
Prrg4  
Prss1  
PRSS12  
Prss2  
PRSS22  
Prss23  
Prss27  
Prss28  
Prss29  
PRSS29P  
PRSS3  
Prss33  
Prss34  
Prss35  
PRSS36  
Prss37  
Prss38  
Prss39  
Prss40  
Prss42  
Prss45  
PRSS47  
Prss48  
Prss53  
Prss54  
Prss57  
Prss58  
Prss8  
PRTN3

olfr596  
olfr597  
olfr598  
olfr599  
olfr6  
olfr60  
olfr600  
olfr601  
olfr603  
olfr605  
olfr606  
olfr607  
olfr608  
olfr609  
olfr61  
olfr610  
olfr611  
olfr612  
olfr613  
olfr615  
olfr616  
olfr617  
olfr618  
olfr619  
olfr62  
olfr620  
olfr622  
olfr623  
olfr624  
olfr628  
olfr629  
olfr63  
olfr630  
olfr631  
olfr632  
olfr633  
olfr635  
olfr638  
olfr639  
olfr64  
olfr640  
olfr641  
olfr642  
olfr643  
olfr644  
olfr645  
olfr646

CCL5  
FGF2  
MDK  
ACTN2  
FLNA  
GLG1  
SERPING1  
VCL  
SAA1  
NRP1  
SEMA3B  
NRP1  
SEMA3A  
NRP1  
SEMA3B  
SEMA3A  
NRP1  
SEMA3C  
NRP1  
SEMA3D  
NRP1  
SEMA3F  
SHBG  
SEMA3F  
VEGFA  
SEMA3F  
PLXNB1  
SEMA4A  
PLXNB1  
SEMA4B  
PLXNB1  
SEMA4D  
TLR9  
SIGIRR  
ALB  
SLC1A5  
LGALS9  
SLC1A5  
TNFRSF1A  
SLC1A5  
TNFRSF1B  
SLC1A5  
LCN2  
SLC22A17  
CSF1  
SLC7A1  
FURIN  
SORCS1  
NGF  
SORCS3  
FURIN  
SORL1  
BDNF  
SORT1  
NGF  
SORT1  
NGFR  
SORT1  
NTS  
SORT1  
ICAM1  
SPN  
LGALS1  
SPN  
LGALS3  
SPN  
SIGLEC1  
SPN  
MET  
SPSB1  
C1QBP  
SSR4  
HSPD1  
SSR4  
SOD1  
SSR4  
TNFRSF1A  
SSR4  
TNFRSF1B  
SSR4  
CORT  
SSTR1  
SST  
SSTR1



|         |         |          |        |
|---------|---------|----------|--------|
| Rbp4    | olfr698 | INHA     | TGFBR3 |
| Reg1    | olfr699 | INHBA    | TGFBR3 |
| REG1A   | olfr70  | TGFB1    | TGFBR3 |
| REG1B   | olfr700 | TGFB2    | TGFBR3 |
| Reg2    | olfr701 | TGFB3    | TGFBR3 |
| Reg3a   | olfr702 | F2       | THBD   |
| Reg3b   | olfr703 | PF4      | THBD   |
| Reg3g   | olfr704 | PROC     | THBD   |
| Reg4    | olfr705 | SERPINA5 | THBD   |
| Rel2    | olfr706 | SERPINE1 | THBD   |
| Reln    | olfr707 | VTN      | THBD   |
| REN     | olfr71  | ALB      | THRAP3 |
| Ren1    | olfr710 | CLEC3B   | THRAP3 |
| Ren2    | olfr711 | ANGPT4   | TIE1   |
| Resp18  | olfr713 | CASP1    | TIRAP  |
| Retn    | olfr714 | IL1RL1   | TIRAP  |
| Retnla  | olfr715 | FLNA     | TLR1   |
| Retnlb  | olfr716 | HSPD1    | TLR1   |
| RFNG    | olfr720 | TLR9     | TLR1   |
| RLN1    | olfr722 | FLNA     | TLR10  |
| RLN2    | olfr723 | CD14     | TLR2   |
| Rln3    | olfr724 | EGFR     | TLR2   |
| RNASE1  | olfr725 | HMGB1    | TLR2   |
| Rnase10 | olfr726 | LY96     | TLR2   |
| RNASE11 | olfr727 | SFTPA1   | TLR2   |
| Rnase12 | olfr728 | SFTPD    | TLR2   |
| Rnase13 | olfr729 | CD14     | TLR3   |
| RNASE2  | olfr73  | ANXA2    | TLR4   |
| RNASE3  | olfr730 | CD14     | TLR4   |
| RNASE4  | olfr731 | CNPY4    | TLR4   |
| RNASE6  | olfr732 | EGFR     | TLR4   |
| RNASE7  | olfr733 | HMGB1    | TLR4   |
| RNASE8  | olfr734 | LY86     | TLR4   |
| Rnase9  | olfr735 | LY96     | TLR4   |
| RNASET2 | olfr736 | MBL2     | TLR4   |
| Rnh1    | olfr738 | S100A8   | TLR4   |
| Rnls    | olfr739 | SFTPA1   | TLR4   |
| Rnpep   | olfr74  | SFTPA2   | TLR4   |
| RPESP   | olfr740 | SFTPD    | TLR4   |
| RPTN    | olfr741 | TREM1    | TLR4   |
| Rs1     | olfr742 | CD14     | TLR7   |
| Rspo1   | olfr743 | CD14     | TLR8   |
| Rspo2   | olfr744 | TLR9     | TLR8   |
| Rspo3   | olfr745 | AGER     | TLR9   |
| Rspo4   | olfr746 | CD14     | TLR9   |
| Rspry1  | olfr747 | HMGB1    | TLR9   |
| Rtbdn   | olfr748 | APP      | TM2D1  |

|         |         |          |           |
|---------|---------|----------|-----------|
| RTN3    | olfr749 | SPINK1   | TMPRSS15  |
| S100A12 | olfr750 | COL2A1   | TNFRSF10A |
| S100a13 | olfr76  | TNFSF10  | TNFRSF10A |
| S100A7  | olfr761 | FAS      | TNFRSF10B |
| S100a8  | olfr763 | FASLG    | TNFRSF10B |
| S100a9  | olfr764 | TNFRSF1A | TNFRSF10B |
| S100b   | olfr765 | TNFSF10  | TNFRSF10B |
| Saa1    | olfr766 | APOA1    | TNFRSF10C |
| Saa2    | olfr767 | LRSAM1   | TNFRSF10C |
| Saa3    | olfr768 | TNFSF10  | TNFRSF10C |
| SAA3P   | olfr769 | CALR     | TNFRSF10D |
| Saa4    | olfr77  | MIF      | TNFRSF10D |
| Saal1   | olfr770 | TNFSF10  | TNFRSF10D |
| SAMD1   | olfr771 | WDR1     | TNFRSF10D |
| Sbp     | olfr772 | TNFSF11  | TNFRSF11A |
| Sbsn    | olfr773 | FN1      | TNFRSF11B |
| Scara3  | olfr774 | THBS1    | TNFRSF11B |
| Scg2    | olfr775 | TNFSF10  | TNFRSF11B |
| Scg3    | olfr776 | TNFSF11  | TNFRSF11B |
| Scg5    | olfr777 | TNFSF13  | TNFRSF11B |
| Scgb1a1 | olfr779 | VTN      | TNFRSF11B |
| SCGB1C1 | olfr78  | VWF      | TNFRSF11B |
| SCGB1D1 | olfr780 | TNFSF12  | TNFRSF12A |
| SCGB1D2 | olfr781 | TNFSF13  | TNFRSF13B |
| SCGB1D4 | olfr782 | TNFSF13B | TNFRSF13B |
| SCGB2A1 | olfr784 | TNFSF13B | TNFRSF13C |
| SCGB2A2 | olfr786 | DCD      | TNFRSF14  |
| Scgb3a1 | olfr787 | LTA      | TNFRSF14  |
| Scgb3a2 | olfr788 | MIF      | TNFRSF14  |
| SCGBL   | olfr790 | P4HB     | TNFRSF14  |
| Scgn    | olfr791 | TNFSF13  | TNFRSF14  |
| Scpep1  | olfr792 | TNFSF14  | TNFRSF14  |
| Scrg1   | olfr794 | TNFSF13  | TNFRSF17  |
| Sct     | olfr796 | TNFSF13B | TNFRSF17  |
| Scube1  | olfr798 | TNFSF18  | TNFRSF18  |
| Scube2  | olfr799 | C1QBP    | TNFRSF1A  |
| Scube3  | olfr8   | ERAP1    | TNFRSF1A  |
| Sdc1    | olfr800 | FAS      | TNFRSF1A  |
| SDC4    | olfr801 | FASLG    | TNFRSF1A  |
| Sdf2    | olfr802 | FBLN2    | TNFRSF1A  |
| SECTM1  | olfr803 | HSP90AA1 | TNFRSF1A  |
| SELE    | olfr804 | HSPA5    | TNFRSF1A  |
| Selp    | olfr805 | HSPA8    | TNFRSF1A  |
| SELS    | olfr806 | KARS     | TNFRSF1A  |
| SEMA3A  | olfr807 | LTA      | TNFRSF1A  |
| SEMA3B  | olfr808 | LTB      | TNFRSF1A  |
| SEMA3C  | olfr809 | MYOC     | TNFRSF1A  |

|           |         |
|-----------|---------|
| SEMA3D    | olfr810 |
| SEMA3E    | olfr811 |
| SEMA3F    | olfr812 |
| SEMA3G    | olfr813 |
| SEMG1     | olfr814 |
| SEMG2     | olfr815 |
| SEPN1     | olfr816 |
| Sepp1     | olfr818 |
| Serac1    | olfr819 |
| SERPINA1  | olfr820 |
| Serpina10 | olfr821 |
| Serpina11 | olfr822 |
| Serpina12 | olfr823 |
| SERPINA13 | olfr824 |
| Serpina1a | olfr825 |
| Serpina1b | olfr826 |
| Serpina1c | olfr827 |
| Serpina1d | olfr828 |
| Serpina1e | olfr829 |
| Serpina1f | olfr830 |
| SERPINA2  | olfr832 |
| SERPINA3  | olfr834 |
| Serpina3a | olfr835 |
| Serpina3b | olfr836 |
| Serpina3c | olfr837 |
| Serpina3f | olfr843 |
| Serpina3g | olfr844 |
| Serpina3h | olfr845 |
| Serpina3k | olfr846 |
| Serpina3m | olfr847 |
| Serpina3n | olfr849 |
| SERPINA4  | olfr850 |
| Serpina5  | olfr851 |
| Serpina6  | olfr853 |
| Serpina7  | olfr854 |
| Serpina9  | olfr855 |
| SERPINB1  | olfr857 |
| Serpinb13 | olfr859 |
| Serpinb1a | olfr860 |
| Serpinb1b | olfr862 |
| Serpinb1c | olfr866 |
| Serpinb2  | olfr867 |
| SERPINB3  | olfr868 |
| Serpinb3a | olfr869 |
| Serpinb3b | olfr870 |
| Serpinb3c | olfr871 |
| Serpinb3d | olfr872 |

|           |          |
|-----------|----------|
| SLC1A5    | TNFRSF1A |
| TNF       | TNFRSF1A |
| TNFRSF25  | TNFRSF1A |
| TNFSF13   | TNFRSF1A |
| C1QBP     | TNFRSF1B |
| FLNA      | TNFRSF1B |
| HSPA5     | TNFRSF1B |
| HSPA8     | TNFRSF1B |
| LTA       | TNFRSF1B |
| POTEKP    | TNFRSF1B |
| SERPINB3  | TNFRSF1B |
| SLC1A3    | TNFRSF1B |
| SLC1A5    | TNFRSF1B |
| TNF       | TNFRSF1B |
| TNFSF10   | TNFRSF22 |
| TNFSF10   | TNFRSF23 |
| TNFRSF1A  | TNFRSF25 |
| TNFSF12   | TNFRSF25 |
| TNFSF15   | TNFRSF25 |
| TNFSF4    | TNFRSF4  |
| FASLG     | TNFRSF6B |
| TNFSF14   | TNFRSF6B |
| TNFSF15   | TNFRSF6B |
| TNFSF8    | TNFRSF8  |
| TNFSF9    | TNFRSF9  |
| ADAM17    | TNFSF11  |
| MMP1      | TNFSF11  |
| MMP3      | TNFSF11  |
| MMP7      | TNFSF11  |
| TNFRSF11B | TNFSF11  |
| TNFRSF18  | TNFSF18  |
| TRH       | TRHR     |
| TRH       | TRHR2    |
| ANXA1     | TRPM7    |
| ANXA2     | TRPV6    |
| CALR      | TSHR     |
| FN1       | TSHR     |
| GNAS      | TSHR     |
| HSPA5     | TSHR     |
| LHCGR     | TSHR     |
| TSHB      | TSHR     |
| GAS6      | TYRO3    |
| PROS1     | TYRO3    |
| STX1A     | UNC13B   |
| NTN1      | UNC5A    |
| NTN1      | UNC5B    |
| NTN1      | UNC5C    |



|          |         |
|----------|---------|
| SERPINB4 | olfr873 |
| Serpinb5 | olfr874 |
| Serpinb9 | olfr875 |
| Serpinc1 | olfr876 |
| SERPIND1 | olfr877 |
| Serpine1 | olfr878 |
| Serpine2 | olfr881 |
| SERPINE3 | olfr883 |
| Serpinf1 | olfr884 |
| Serpinf2 | olfr885 |
| Serping1 | olfr887 |
| SERPINH1 | olfr888 |
| Serpini1 | olfr889 |
| Serpini2 | olfr890 |
| Sez6     | olfr891 |
| Sfn      | olfr893 |
| SFRP1    | olfr894 |
| SFRP2    | olfr895 |
| SFRP4    | olfr898 |
| SFRP5    | olfr899 |
| SFTA2    | olfr9   |
| Sftpa1   | olfr90  |
| SFTPA2   | olfr900 |
| Sftpb    | olfr901 |
| Sftpc    | olfr902 |
| Sftpd    | olfr904 |
| Shbg     | olfr905 |
| Shh      | olfr906 |
| SIAE     | olfr907 |
| Siglec1  | olfr908 |
| SIGLEC10 | olfr91  |
| SIGLEC6  | olfr910 |
| SIRPD    | olfr912 |
| Slc1a3   | olfr913 |
| Slc1a5   | olfr914 |
| Slc2a4   | olfr915 |
| Slit1    | olfr916 |
| Slit2    | olfr917 |
| Slit3    | olfr918 |
| Smap     | olfr919 |
| Slpi     | olfr92  |
| Slurp1   | olfr920 |
| SLURP2   | olfr921 |
| Smc3     | olfr922 |
| Smgc     | olfr923 |
| Smoc1    | olfr924 |
| Smoc2    | olfr926 |

|          |        |
|----------|--------|
| UTS2     | UTS2R  |
| UTS2D    | UTS2R  |
| CAMP     | VDR    |
| ADCYAP1  | VIPR1  |
| GNAS     | VIPR1  |
| PFN1     | VIPR1  |
| RAMP1    | VIPR1  |
| SCT      | VIPR1  |
| VIP      | VIPR1  |
| ADCYAP1  | VIPR2  |
| ERBB2IP  | VIPR2  |
| VIP      | VIPR2  |
| APOE     | VLDLR  |
| CLU      | VLDLR  |
| LPL      | VLDLR  |
| PLAU     | VLDLR  |
| RELN     | VLDLR  |
| SERPINE1 | VLDLR  |
| XCL1     | XCR1   |
| XCL2     | XCR1   |
| BMP4     | ZFYVE9 |
| ERBB2IP  | ZFYVE9 |
| RNPEP    | ZFYVE9 |
| SVEP1    | ZFYVE9 |
| ZPBP     | ZP2    |
| FURIN    | ZP3    |
| ZP3      | ZP3R   |
| FURIN    | ZP4    |

|         |         |
|---------|---------|
| Smpd1   | olfr93  |
| Smpdl3a | olfr930 |
| Smpdl3b | olfr933 |
| Smr2    | olfr934 |
| Smr3a   | olfr935 |
| SMR3B   | olfr936 |
| Snca    | olfr937 |
| Sned1   | olfr938 |
| Sod1    | olfr94  |
| Sod3    | olfr943 |
| SORD    | olfr944 |
| SORL1   | olfr945 |
| Sost    | olfr948 |
| Sostdc1 | olfr95  |
| Spaca3  | olfr951 |
| Spaca5  | olfr952 |
| Spaca7  | olfr954 |
| SPAG11A | olfr955 |
| SPAG11B | olfr957 |
| Sparc   | olfr958 |
| Sparcl1 | olfr959 |
| Spata20 | olfr96  |
| Spata6  | olfr960 |
| SPINK1  | olfr961 |
| Spink11 | olfr963 |
| Spink12 | olfr965 |
| Spink13 | olfr967 |
| SPINK14 | olfr968 |
| Spink2  | olfr969 |
| Spink3  | olfr97  |
| SPINK4  | olfr970 |
| Spink5  | olfr971 |
| Spink6  | olfr972 |
| SPINK7  | olfr974 |
| Spink8  | olfr975 |
| SPINK9  | olfr976 |
| Spinkl  | olfr978 |
| Spinlw1 | olfr979 |
| Spint1  | olfr98  |
| SPINT2  | olfr980 |
| SPINT3  | olfr981 |
| Spint4  | olfr982 |
| Spn     | olfr983 |
| Spock1  | olfr984 |
| Spock2  | olfr985 |
| Spock3  | olfr986 |
| Spon1   | olfr987 |

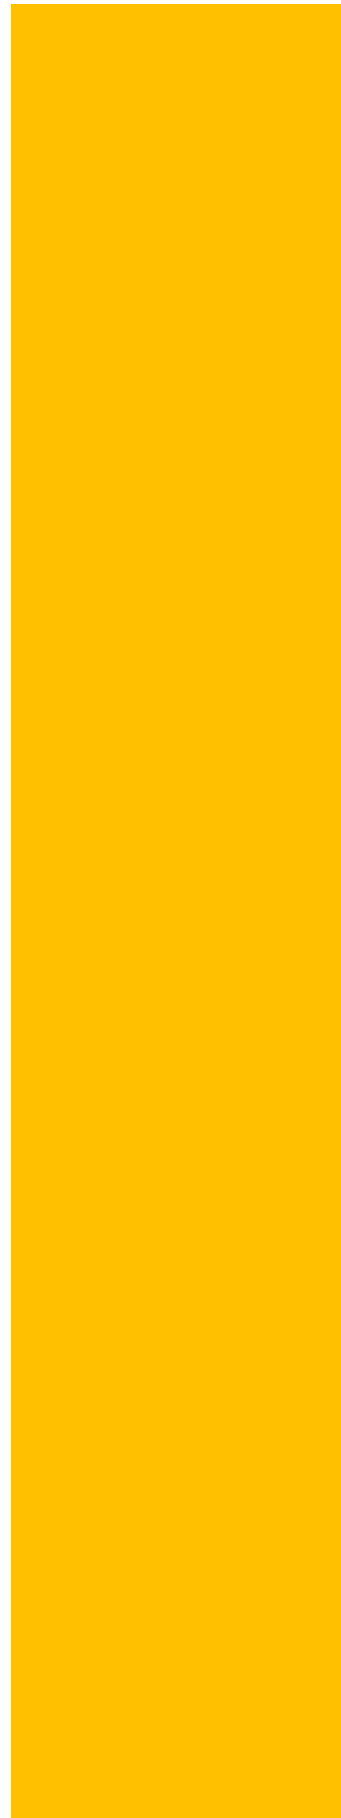

|         |          |
|---------|----------|
| Spon2   | olfr988  |
| Spp1    | olfr99   |
| Spp2    | olfr992  |
| SRCRB4D | olfr993  |
| Srgn    | olfr994  |
| Srpx2   | olfr995  |
| SSC5D   | olfr996  |
| Sspo    | olfr998  |
| Sst     | olr1     |
| St14    | opcml    |
| St3gal1 | opn1lw   |
| St3gal2 | opn1mw   |
| ST3GAL3 | opn1mw2  |
| ST3GAL4 | opn1sw   |
| St6gal1 | opn3     |
| STATH   | opn4     |
| Stc1    | opn5     |
| Stc2    | oprd1    |
| STRCP1  | oprk1    |
| STX1A   | oprl1    |
| Sulf1   | oprm1    |
| Sulf2   | oprs1    |
| Sva     | or10a2   |
| Svep1   | or10a3   |
| Svs3a   | or10a4   |
| Svs4    | or10a5   |
| Svs5    | or10a6   |
| Tac1    | or10a7   |
| Tac2    | or10ac1p |
| TAC3    | or10ad1  |
| Tac4    | or10ag1  |
| Tbc1d15 | or10c1   |
| TCN1    | or10d3   |
| Tcn2    | or10d4p  |
| Tctn1   | or10g2   |
| Tdgf1   | or10g3   |
| Tecta   | or10g4   |
| Tectb   | or10g6   |
| TEPP    | or10g7   |
| TEX264  | or10g8   |
| TF      | or10g9   |
| Tff1    | or10h1   |
| TFF2    | or10h2   |
| Tff3    | or10h3   |
| Tfip11  | or10h4   |
| Tfpi    | or10h5   |
| Tfpi2   | or10j1   |



|             |         |
|-------------|---------|
| TFRC        | or10j3  |
| Tg          | or10j4  |
| Tgfa        | or10j5  |
| Tgfb1       | or10j6p |
| TGFB111     | or10k1  |
| Tgfb2       | or10k2  |
| Tgfb3       | or10p1  |
| Tgfb4       | or10q1  |
| TGFB3       | or10r2  |
| Tgm2        | or10s1  |
| Tgm4        | or10t2  |
| THBD        | or10v1  |
| Thbs1       | or10w1  |
| Thbs2       | or10x1  |
| Thbs3       | or10z1  |
| Thbs4       | or11a1  |
| THNSL2      | or11g2  |
| Thpo        | or11h1  |
| THSD1       | or11h12 |
| Thsd4       | or11h2  |
| Timp1       | or11h4  |
| Timp2       | or11h6  |
| Timp3       | or11h7  |
| Timp4       | or11i1  |
| Tinag       | or12d2  |
| TINAGL1     | or12d3  |
| Tll1        | or13a1  |
| Tll2        | or13c2  |
| TLN1        | or13c3  |
| TLR9        | or13c4  |
| TMEFF2      | or13c5  |
| TMEM155     | or13c8  |
| TMEM229A    | or13c9  |
| Tmem25      | or13d1  |
| Tmprss11a   | or13f1  |
| TMPRSS11B   | or13g1  |
| Tmprss11bnl | or13h1  |
| Tmprss11d   | or13j1  |
| Tmprss11e   | or14a16 |
| Tmprss11f   | or14a2  |
| TMPRSS2     | or14c36 |
| TMSB4X      | or14i1  |
| Tnc         | or14j1  |
| Tnf         | or14k1  |
| TNFAIP2     | or14l1p |
| TNFRSF11B   | or1a1   |
| TNFRSF18    | or1a2   |

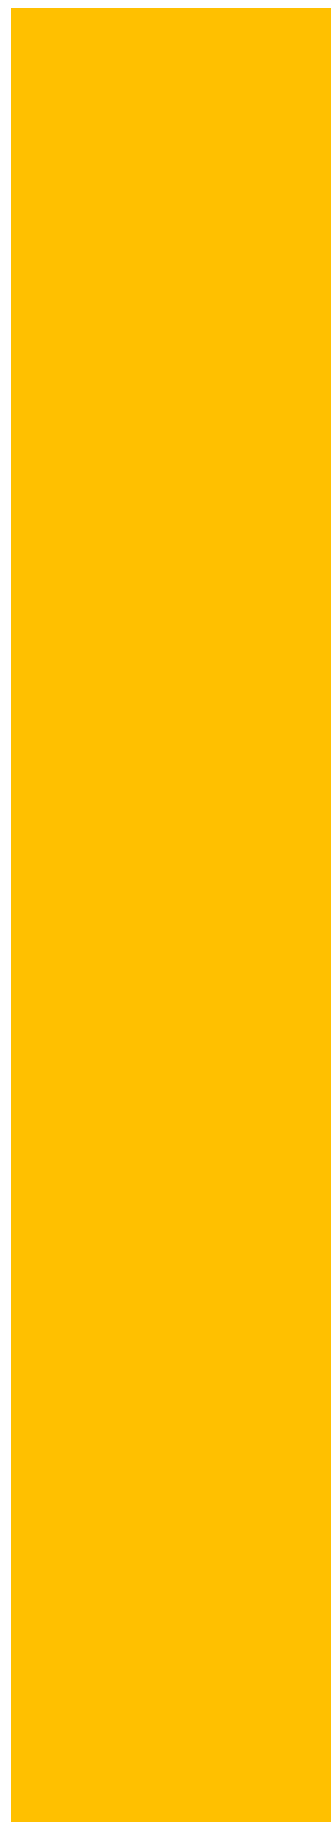

|          |        |
|----------|--------|
| TNFRSF1A | or1b1  |
| TNFRSF1B | or1c1  |
| TNFRSF25 | or1d2  |
| TNFRSF6B | or1d4  |
| Tnfsf10  | or1d5  |
| TNFSF11  | or1e1  |
| Tnfsf12  | or1e2  |
| Tnfsf13  | or1e3  |
| Tnfsf13b | or1f1  |
| Tnfsf14  | or1f12 |
| Tnfsf15  | or1f2p |
| TNFSF18  | or1g1  |
| Tnfsf4   | or1i1  |
| TNFSF5   | or1j1  |
| Tnfsf8   | or1j2  |
| Tnfsf9   | or1j4  |
| Tnn      | or1k1  |
| Tnr      | or1l1  |
| Tnxb     | or1l3  |
| Tor2a    | or1l4  |
| TP73-AS1 | or1l6  |
| TPSAB1   | or1l8  |
| Tpsb2    | or1m1  |
| TPSD1    | or1n1  |
| Tpt1     | or1n2  |
| TREM1    | or1p1  |
| TREM2    | or1q1  |
| TREML4   | or1s1  |
| Trf      | or1s2  |
| Trh      | or2a1  |
| TRY6     | or2a12 |
| TSHB     | or2a14 |
| Tsku     | or2a2  |
| Tslp     | or2a25 |
| TSPEAR   | or2a4  |
| TTN      | or2a5  |
| Ttr      | or2a7  |
| TUB      | or2ae1 |
| TUBA4A   | or2ag1 |
| Tuft1    | or2ag2 |
| TULP1    | or2aj1 |
| Tulp2    | or2ak2 |
| Tulp3    | or2ap1 |
| Twsg1    | or2at4 |
| TXLNA    | or2b11 |
| TXN      | or2b2  |
| Txn1     | or2b3  |



|         |        |
|---------|--------|
| Txndc16 | or2b6  |
| UACA    | or2b8p |
| Ucma    | or2c1  |
| Ucn     | or2c3  |
| Ucn2    | or2d2  |
| Ucn3    | or2d3  |
| ULBP2   | or2f1  |
| Umod    | or2f2  |
| Umodl1  | or2g2  |
| Ush2a   | or2g3  |
| Utp11l  | or2g6  |
| Uts2    | or2h1  |
| Uts2d   | or2h2  |
| Vash1   | or2i1p |
| VASN    | or2j1  |
| Vcam1   | or2j2  |
| Vcan    | or2j3  |
| VCL     | or2k2  |
| Vegfa   | or2l13 |
| Vegfb   | or2l2  |
| Vegfc   | or2l3  |
| Vgf     | or2l5  |
| Vip     | or2l8  |
| Vit     | or2m2  |
| VLDLR   | or2m3  |
| Vmo1    | or2m4  |
| Vnn1    | or2m5  |
| Vnn3    | or2m7  |
| VPREB1  | or2s2  |
| VSIG6   | or2t1  |
| VSIG7   | or2t10 |
| Vstm2a  | or2t11 |
| VTN     | or2t12 |
| Vwa1    | or2t2  |
| Vwa2    | or2t27 |
| VWA3A   | or2t29 |
| Vwa5b1  | or2t3  |
| Vwc2    | or2t33 |
| Vwc2l   | or2t34 |
| Vwce    | or2t35 |
| Vwde    | or2t4  |
| Vwf     | or2t5  |
| Wap     | or2t6  |
| WDR1    | or2t7  |
| WDR33   | or2t8  |
| Wfdc1   | or2v1  |
| WFDC10A | or2v2  |



|         |        |
|---------|--------|
| WFDC10B | or2w1  |
| WFDC11  | or2w3  |
| Wfdc12  | or2w5  |
| WFDC13  | or2w6p |
| Wfdc15a | or2y1  |
| Wfdc15b | or2z1  |
| Wfdc2   | or3a1  |
| WFDC3   | or3a2  |
| WFDC5   | or3a3  |
| WFDC6   | or3a4  |
| Wfdc8   | or4a15 |
| Wfdc9   | or4a16 |
| Wfikkn1 | or4a47 |
| Wfikkn2 | or4a4p |
| Wif1    | or4a5  |
| Wisp1   | or4a8p |
| Wisp2   | or4b1  |
| WISP3   | or4c11 |
| Wnt1    | or4c12 |
| Wnt10a  | or4c13 |
| Wnt10b  | or4c15 |
| Wnt11   | or4c16 |
| Wnt16   | or4c3  |
| Wnt2    | or4c45 |
| Wnt2b   | or4c46 |
| Wnt3    | or4c5  |
| Wnt3a   | or4c6  |
| Wnt4    | or4d1  |
| Wnt5a   | or4d10 |
| Wnt5b   | or4d11 |
| Wnt6    | or4d2  |
| Wnt7a   | or4d5  |
| Wnt7b   | or4d6  |
| Wnt8a   | or4d9  |
| Wnt8b   | or4e1  |
| Wnt9a   | or4e2  |
| Wnt9b   | or4f15 |
| Xcl1    | or4f17 |
| XCL2    | or4f21 |
| Xdh     | or4f3  |
| XYLT1   | or4f4  |
| YARS    | or4f5  |
| Ybx1    | or4f6  |
| Zg16    | or4k1  |
| ZG16B   | or4k13 |
| Zp1     | or4k14 |
| ZP2     | or4k15 |



ZP3  
ZP4  
Zpbp  
Zpbp2

or4k17  
or4k2  
or4k3  
or4k5  
or4l1  
or4m1  
or4m2  
or4n2  
or4n4  
or4n5  
or4p4  
or4q2  
or4q3  
or4s1  
or4s2  
or4x1  
or4x2  
or51a2  
or51a4  
or51a7  
or51b2  
or51b4  
or51b5  
or51b6  
or51d1  
or51e1  
or51e2  
or51f1  
or51f2  
or51g1  
or51g2  
or51h1p  
or51i1  
or51i2  
or51j1  
or51l1  
or51m1  
or51q1  
or51s1  
or51t1  
or51v1  
or52a1  
or52a4  
or52a5  
or52b2  
or52b4  
or52b6





or52d1  
or52e1  
or52e2  
or52e4  
or52e5  
or52e6  
or52e8  
or52h1  
or52i1  
or52i2  
or52j3  
or52k1  
or52k2  
or52l1  
or52l2p  
or52m1  
or52n1  
or52n2  
or52n4  
or52n5  
or52p1p  
or52r1  
or52w1  
or52z1  
or56a1  
or56a3  
or56a4  
or56a5  
or56b1  
or56b2p  
or56b4  
or5a1  
or5a2  
or5ac1  
or5ac2  
or5ak2  
or5ak3p  
or5al1  
or5an1  
or5ap2  
or5ar1  
or5as1  
or5au1  
or5b12  
or5b17  
or5b2  
or5b21

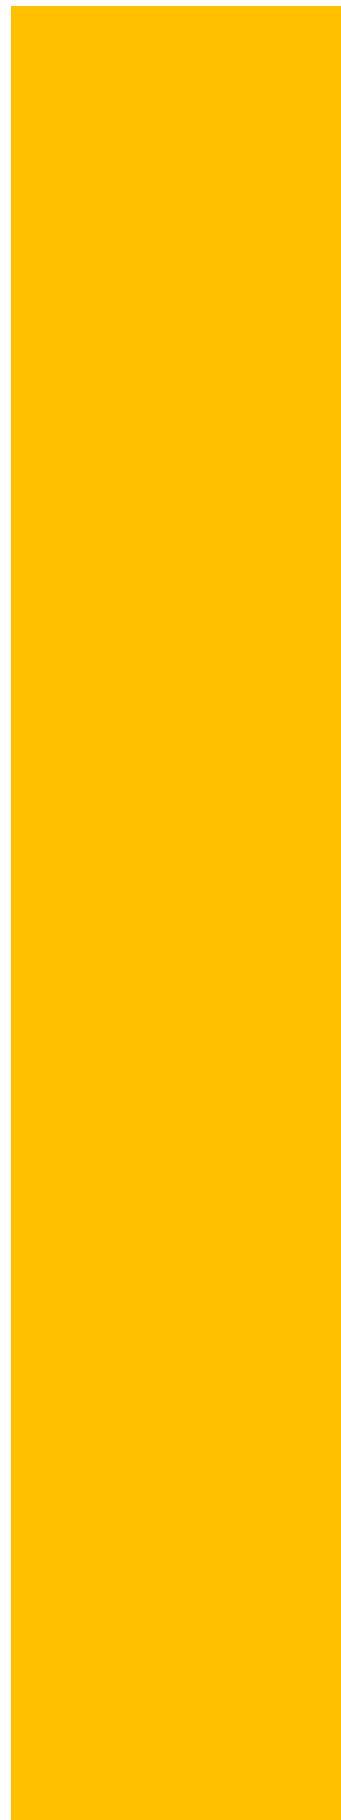

or5b3  
or5c1  
or5d13  
or5d14  
or5d16  
or5d18  
or5f1  
or5g3  
or5h1  
or5h14  
or5h15  
or5h2  
or5h6  
or5i1  
or5j2  
or5k1  
or5k2  
or5k3  
or5k4  
or5l1  
or5l2  
or5m1  
or5m10  
or5m11  
or5m3  
or5m8  
or5m9  
or5p2  
or5p3  
or5r1  
or5t1  
or5t2  
or5t3  
or5v1  
or5w2  
or6a2  
or6b1  
or6b2  
or6b3  
or6c1  
or6c2  
or6c3  
or6c4  
or6c6  
or6c65  
or6c68  
or6c70



or6c74  
or6c75  
or6c76  
or6f1  
or6j1  
or6k2  
or6k3  
or6k6  
or6m1  
or6n1  
or6n2  
or6p1  
or6q1  
or6s1  
or6t1  
or6v1  
or6x1  
or6y1  
or7a10  
or7a17  
or7a2p  
or7a5  
or7c1  
or7c2  
or7d2  
or7d4  
or7e24  
or7g1  
or7g2  
or7g3  
or8a1  
or8b12  
or8b2  
or8b3  
or8b4  
or8b8  
or8d1  
or8d2  
or8d4  
or8g1  
or8g2  
or8g5  
or8h1  
or8h2  
or8h3  
or8i2  
or8j1

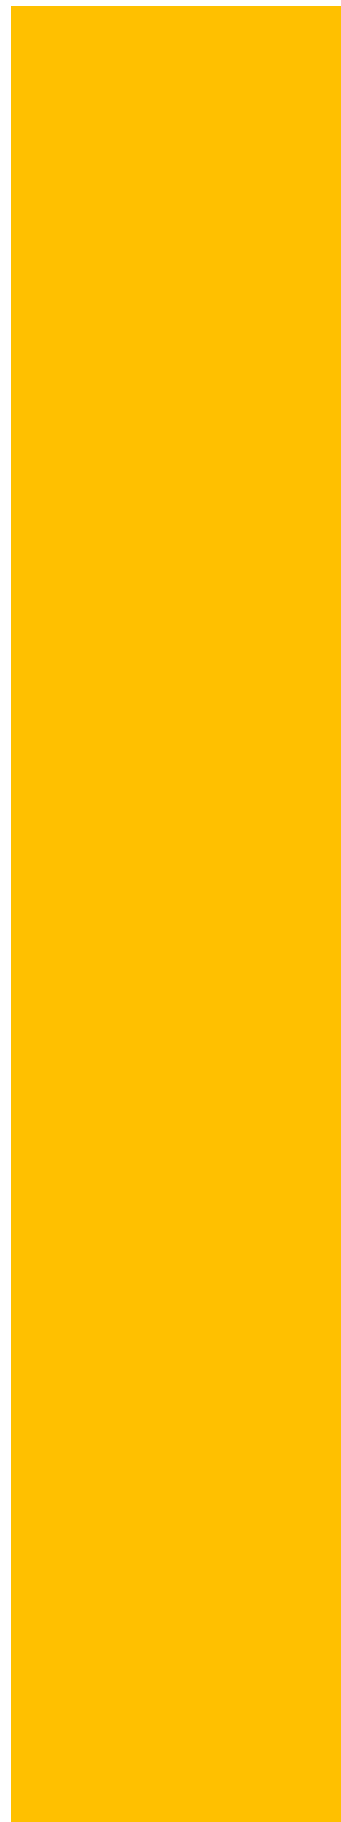

or8j2  
or8j3  
or8k1  
or8k3  
or8k5  
or8s1  
or8u1  
or8u8  
or8u9  
or9a1p  
or9a2  
or9a4  
or9g1  
or9g4  
or9g9  
or9i1  
or9k2  
or9q1  
or9q2  
oscar  
osmr  
oxer1  
oxgr1  
oxtr  
p01737  
p04436  
p2rx1  
p2rx2  
p2rx3  
p2rx4  
p2rx5  
p2rx6  
p2rx7  
p2ry1  
p2ry10  
p2ry11  
p2ry12  
p2ry13  
p2ry14  
p2ry2  
p2ry4  
p2ry6  
p2ry8  
paqr3  
paqr4  
paqr5  
paqr6

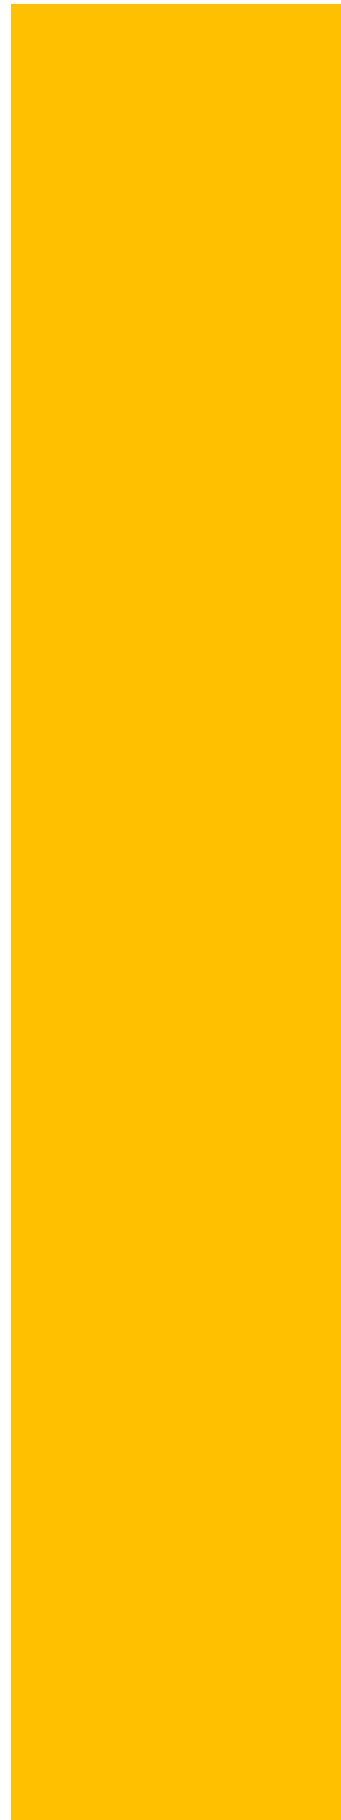

paqr7  
paqr8  
paqr9  
pax8  
pdcd1lg2  
pdgfra  
pdgfrb  
pdgfrl  
pear1  
pex5  
pgbd1  
pglyrp1  
pglyrp2  
pglyrp3  
pglyrp4  
pgr  
pgr15l  
pgrmc1  
pgrmc2  
phb2  
pilra  
pilrb  
pira11  
pkhd1  
pkhd1l1  
pla2r1  
plaur  
plxna1  
plxna2  
plxna3  
plxna4  
plxnb1  
plxnb2  
plxnb3  
plxnc1  
plxnd1  
pnrc1  
ppara  
ppard  
pparg  
ppargc1a  
ppargc1b  
ppyr1  
pr  
prg4  
prlhr  
prlr

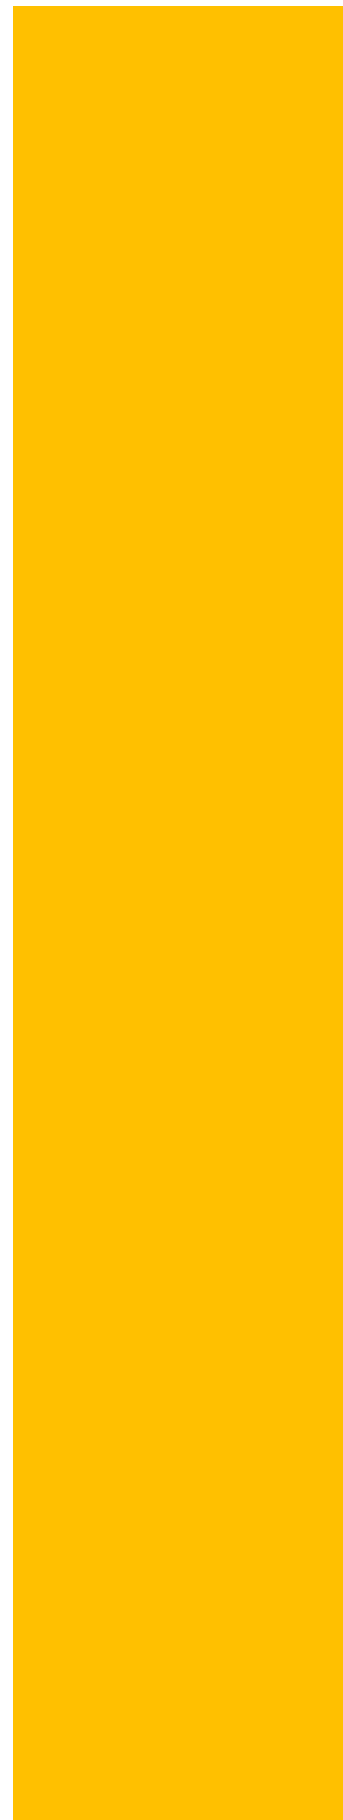

procr  
prokr1  
prokr2  
prss12  
ptafr  
ptch1  
ptch2  
ptchd1  
ptchd2  
ptchd3  
ptcra  
ptgdr  
ptger1  
ptger2  
ptger3  
ptger4  
ptgfr  
ptgir  
pth1r  
pth2r  
ptk7  
ptpn1  
ptpn12  
ptpn14  
ptpn18  
ptpn1l  
ptpn2  
ptpn20a  
ptpn23  
ptpn3  
ptpn5  
ptpn7  
ptpn9  
ptpra  
ptprb  
ptprc  
ptprcap  
ptprd  
ptpre  
ptprf  
ptprg  
ptprh  
ptprj  
ptprk  
ptprm  
ptprn  
ptprn2



ptpro  
ptprq  
ptprp  
ptprs  
ptprt  
ptpru  
ptprz1  
pvr  
pvrl1  
pvrl2  
pvrl4  
q32vq0  
q4g0t1  
q6iex5  
q8n0w0  
q8nga4  
q8ngm4  
q8ngm6  
q8nh33  
q8nh68  
q8nh95  
qrfpr  
rage  
ramp1  
ramp2  
ramp3  
rapsn  
rara  
rarb  
rarg  
reep1  
reep2  
reep5  
reep6  
relt  
ret  
rgr  
rho  
ripk2  
ripk4  
rnf135  
rnf139  
robo1  
robo2  
robo3  
robo4  
ror1



ror2  
rora  
rorb  
rorc  
ros1  
rpesp  
rpsa  
rrbp1  
rrh  
rtn4r  
rtn4rl1  
rtn4rl2  
rtp1  
rxfp1  
rxfp2  
rxfp3  
rxfp4  
rxra  
rxrb  
rxrg  
ryk  
ryr1  
ryr2  
ryr3  
s1pr1  
s1pr2  
s1pr3  
s1pr4  
s1pr5  
sarg  
sarm1  
scara3  
scara5  
scarb1  
scarb2  
scarf1  
scarf2  
sctr  
sdc4  
sec62  
sec63  
sele  
sels  
sema3a  
sema3b  
sema3c  
sema3d





sema3e  
sema3f  
sema3g  
sema4a  
sema4b  
sema4c  
sema4d  
sema4f  
sema4g  
sema5a  
sema5b  
sema6a  
sema6b  
sema6c  
sema6d  
sema7a  
sfrp1  
sfrp2  
sfrp4  
sfrp5  
sigirr  
siglec7  
siglec8  
siglece  
sigmar1  
siva1  
slamf1  
slamf6  
slamf7  
slamf8  
slamf9  
slc1a5  
slc20a1  
slc20a2  
slc22a17  
slc7a1  
smo  
sorcs1  
sorcs2  
sorcs3  
sorl1  
sort1  
specc1l  
spn  
spsb1  
spsb3  
sra1



srcrb4d  
srpr  
srprb  
ssc5d  
ssr3  
ssr4  
sstr1  
sstr2  
sstr3  
sstr4  
sstr5  
stab1  
stab2  
stra6  
strap  
sucnr1  
susd2  
sv2a  
sv2b  
sv2c  
taar1  
taar2  
taar3  
taar4  
taar5  
taar6  
taar7a  
taar7b  
taar7d  
taar7e  
taar7f  
taar8  
taar8a  
taar8b  
taar8c  
taar9  
tacr1  
tacr2  
tacr3  
tacstd2  
tapt1  
tas1r1  
tas1r2  
tas1r3  
tas2r1  
tas2r10  
tas2r102



tas2r103  
tas2r104  
tas2r105  
tas2r106  
tas2r107  
tas2r108  
tas2r109  
tas2r110  
tas2r113  
tas2r114  
tas2r115  
tas2r116  
tas2r117  
tas2r118  
tas2r119  
tas2r12  
tas2r120  
tas2r121  
tas2r122  
tas2r123  
tas2r124  
tas2r125  
tas2r126  
tas2r129  
tas2r13  
tas2r130  
tas2r131  
tas2r134  
tas2r135  
tas2r136  
tas2r137  
tas2r138  
tas2r139  
tas2r14  
tas2r140  
tas2r143  
tas2r144  
tas2r16  
tas2r19  
tas2r20  
tas2r3  
tas2r30  
tas2r31  
tas2r38  
tas2r39  
tas2r4  
tas2r40



tas2r41  
tas2r42  
tas2r43  
tas2r45  
tas2r46  
tas2r5  
tas2r50  
tas2r60  
tas2r7  
tas2r8  
tas2r9  
tbxa2r  
tcra  
tcrb  
tek  
tfr2  
tfr3  
tg  
tgfbr1  
tgfbr2  
tgfbr3  
thbd  
thra  
thrap3  
thrb  
ticam2  
tie1  
timd2  
tinag  
tinagl1  
tirap  
tirap3  
tlr1  
tlr10  
tlr11  
tlr12  
tlr13  
tlr2  
tlr3  
tlr4  
tlr5  
tlr6  
tlr7  
tlr8  
tlr9  
tm2d1  
tmem123



tnmem149  
tmprss13  
tmprss15  
tmprss2  
tmprss3  
tmprss4  
tmprss5  
tnfrsf10a  
tnfrsf10b  
tnfrsf10c  
tnfrsf10d  
tnfrsf11a  
tnfrsf11b  
tnfrsf12a  
tnfrsf13b  
tnfrsf13c  
tnfrsf14  
tnfrsf17  
tnfrsf18  
tnfrsf19  
tnfrsf1a  
tnfrsf1b  
tnfrsf21  
tnfrsf22  
tnfrsf23  
tnfrsf25  
tnfrsf26  
tnfrsf4  
tnfrsf6b  
tnfrsf8  
tnfrsf9  
tnfsf11  
tnfsf18  
tnk1  
tnk2  
tnpo3  
tomm22  
tomm70a  
tpra1  
trac  
traf1  
traf2  
traf4  
tram1  
trbc1  
trbc2  
trbv12-3



trbv20or9-2  
trdc  
trem1  
trem2  
trem3  
treml1  
treml2  
treml4  
trfr2  
trgc1  
trgc2  
trgv3  
trhr  
trhr2  
trim27  
trip6  
trpc1  
trpc2  
trpc3  
trpc4  
trpc4ap  
trpc5  
trpc7  
trpm1  
trpm2  
trpm3  
trpm4  
trpm5  
trpm6  
trpm7  
trpm8  
trpv4  
trpv6  
tshr  
tspan12  
tspo  
tspo2  
tub  
tulp1  
tyro3  
ulbp1  
ulbp2  
ulbp3  
unc13b  
unc13c  
unc5a  
unc5b



unc5c  
unc5d  
uts2r  
v1ra8  
v1rg10  
v1rh19  
vac14  
vdr  
vipr1  
vipr2  
vldlr  
vmn1r10  
vmn1r11  
vmn1r112  
vmn1r114  
vmn1r115  
vmn1r118  
vmn1r120  
vmn1r121  
vmn1r123  
vmn1r124  
vmn1r127  
vmn1r128  
vmn1r13  
vmn1r14  
vmn1r142  
vmn1r15  
vmn1r16  
vmn1r160  
vmn1r17  
vmn1r171  
vmn1r172  
vmn1r178  
vmn1r179  
vmn1r18  
vmn1r180  
vmn1r181  
vmn1r183  
vmn1r185  
vmn1r188  
vmn1r189  
vmn1r19  
vmn1r191  
vmn1r192  
vmn1r193  
vmn1r195  
vmn1r197



vmn1r198  
vmn1r199  
vmn1r2  
vmn1r200  
vmn1r201  
vmn1r202  
vmn1r203  
vmn1r205  
vmn1r206  
vmn1r208  
vmn1r209  
vmn1r21  
vmn1r210  
vmn1r211  
vmn1r212  
vmn1r213  
vmn1r214  
vmn1r215  
vmn1r216  
vmn1r217  
vmn1r218  
vmn1r219  
vmn1r22  
vmn1r220  
vmn1r222  
vmn1r223  
vmn1r225  
vmn1r226  
vmn1r227  
vmn1r228  
vmn1r229  
vmn1r23  
vmn1r230  
vmn1r231  
vmn1r232  
vmn1r233  
vmn1r234  
vmn1r235  
vmn1r236  
vmn1r237  
vmn1r24  
vmn1r25  
vmn1r26  
vmn1r27  
vmn1r28  
vmn1r29  
vmn1r3





vmn1r30  
vmn1r32  
vmn1r33  
vmn1r35  
vmn1r36  
vmn1r37  
vmn1r38  
vmn1r4  
vmn1r40  
vmn1r41  
vmn1r42  
vmn1r43  
vmn1r44  
vmn1r45  
vmn1r46  
vmn1r47  
vmn1r48  
vmn1r49  
vmn1r5  
vmn1r50  
vmn1r51  
vmn1r52  
vmn1r53  
vmn1r54  
vmn1r56  
vmn1r59  
vmn1r6  
vmn1r62  
vmn1r63  
vmn1r64  
vmn1r65  
vmn1r66  
vmn1r67  
vmn1r69  
vmn1r7  
vmn1r70  
vmn1r71  
vmn1r72  
vmn1r73  
vmn1r74  
vmn1r75  
vmn1r76  
vmn1r78  
vmn1r79  
vmn1r8  
vmn1r80  
vmn1r81



vmn1r82  
vmn1r83  
vmn1r84  
vmn1r85  
vmn1r87  
vmn1r89  
vmn1r9  
vmn1r91  
vmn1r94  
vmn2r1  
vmn2r10  
vmn2r100  
vmn2r101  
vmn2r102  
vmn2r103  
vmn2r104  
vmn2r105  
vmn2r107  
vmn2r108  
vmn2r109  
vmn2r11  
vmn2r110  
vmn2r111  
vmn2r112  
vmn2r113  
vmn2r114  
vmn2r115  
vmn2r116  
vmn2r117  
vmn2r118  
vmn2r12  
vmn2r120  
vmn2r121  
vmn2r123  
vmn2r13  
vmn2r14  
vmn2r15  
vmn2r16  
vmn2r17  
vmn2r18  
vmn2r2  
vmn2r20  
vmn2r21  
vmn2r22  
vmn2r23  
vmn2r24  
vmn2r26



vmn2r27  
vmn2r28  
vmn2r29  
vmn2r3  
vmn2r30  
vmn2r31  
vmn2r32  
vmn2r33  
vmn2r34  
vmn2r35  
vmn2r37  
vmn2r38  
vmn2r39  
vmn2r4  
vmn2r41  
vmn2r42  
vmn2r43  
vmn2r44  
vmn2r45  
vmn2r48  
vmn2r49  
vmn2r5  
vmn2r50  
vmn2r51  
vmn2r52  
vmn2r54  
vmn2r56  
vmn2r57  
vmn2r58  
vmn2r59  
vmn2r6  
vmn2r60  
vmn2r61  
vmn2r62  
vmn2r63  
vmn2r66  
vmn2r67  
vmn2r7  
vmn2r70  
vmn2r71  
vmn2r73  
vmn2r74  
vmn2r76  
vmn2r77  
vmn2r78  
vmn2r79  
vmn2r8



vmn2r80  
vmn2r81  
vmn2r83  
vmn2r84  
vmn2r87  
vmn2r89  
vmn2r9  
vmn2r90  
vmn2r91  
vmn2r92  
vmn2r93  
vmn2r94  
vmn2r95  
vmn2r96  
vmn2r97  
vmn2r98  
vmn2r99  
vn1r1  
vn1r17p  
vn1r2  
vn1r3  
vn1r4  
vn1r5  
vpreb1  
vtn  
wls  
xcr1  
xpr1  
zacn  
zfyve9  
znf219  
zp2  
zp3  
zp3r  
zp4

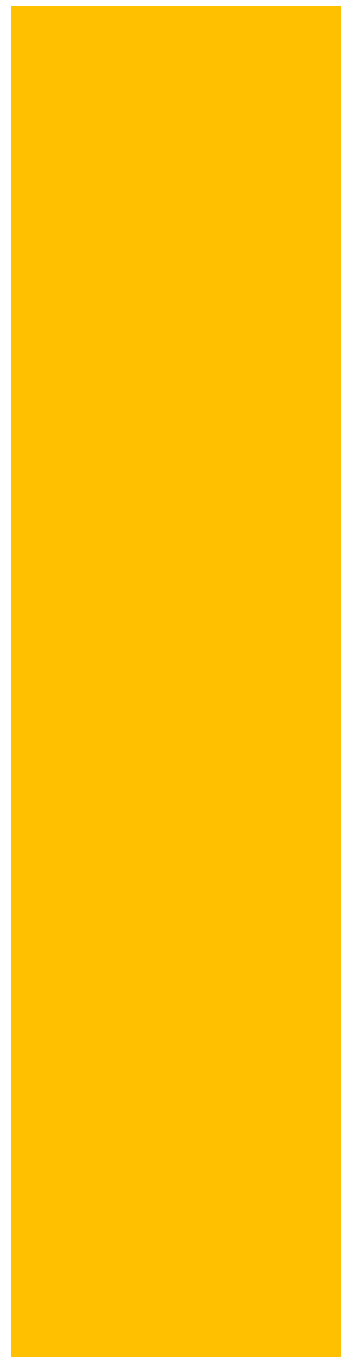

**Supplementary Table S3****Secretory Molecules (Ligand)**

A2M  
ADCYAP1  
ADM  
ADM  
AFP  
AGRP  
JAG1  
AGT  
ALB  
AMH  
ANGPT1  
ANGPT2  
APOA1  
APOB  
APOE  
APOH  
APP  
FASLG  
ASIP  
AVP  
BDNF  
CEACAM1  
BMP1  
BMP2  
BMP3  
BMP4  
BMP5  
BMP6  
BMP7  
BTC  
C1QA  
C3  
C4A  
C5  
CALCA  
CALR  
CCK  
TNFSF8  
CD40LG  
CD59  
CGA  
CHAD  
CHGB  
CLU  
CNTF

**Receptors**

ACVR1  
ACVR1B  
ACVR2A  
ACVR2B  
ACVRL1  
ADCYAP1R1  
ADRA1A  
ADRBK1  
AGER  
AGTR1  
AGTR2  
APLNR  
ALK  
AMHR2  
FAS  
ASGR1  
ASGR2  
AVPR1A  
AVPR1B  
AVPR2  
AXL  
TNFRSF17  
CXCR5  
BMPR1A  
BMPR1B  
BMPR2  
BTN1A1  
C3AR1  
C5AR1  
DDR1  
CCKAR  
CCKBR  
CD2  
CD7  
CD14  
CD22  
TNFRSF8  
CD36  
SCARB1  
CD40  
CD44  
CD47  
CHRNA4  
CHRN2

**Interactions**

| <b>Secretory</b> | <b>Receptor</b> |
|------------------|-----------------|
| A2M              | LRP1            |
| ACE              | AGTR2           |
| ADCYAP1          | ADCYAP1R1       |
| ADIPOQ           | ADIPOR2         |
| ADM              | CALCRL          |
| AFP              | CCR5            |
| AGR3             | DAG1            |
| AGRN             | DAG1            |
| AGRP             | MC3R            |
| AGRP             | MC4R            |
| AGRP             | MC5R            |
| AGT              | AGTR1           |
| AGT              | AGTR2           |
| AGT              | MAS1            |
| ALB              | CUBN            |
| AMH              | AMHR2           |
| ANGPT1           | ITGA5           |
| ANGPT1           | TEK             |
| ANGPT2           | TEK             |
| ANGPT4           | TEK             |
| ANGPT4           | TIE1            |
| ANGPTL1          | TEK             |
| ANGPTL3          | ITGA5           |
| ANGPTL3          | ITGAV           |
| ANGPTL3          | ITGB3           |
| APLN             | APLNR           |
| APOA1            | SCARB1          |
| APOB             | LDLR            |
| APOB             | LRP2            |
| APOE             | LDLR            |
| APOE             | LRP1            |
| APOE             | LRP2            |
| APOE             | LRP8            |
| APOE             | SCARB1          |
| APOE             | VLDLR           |
| APOH             | LRP2            |
| APOH             | LRP8            |
| APP              | LRP1            |
| APP              | TM2D1           |
| ARTN             | GFRA3           |
| ASIP             | ATRN            |
| ASIP             | MC2R            |
| ASIP             | MC3R            |



FGF3  
FGF4  
FGF5  
FGF6  
FGF7  
FGF8  
FGF9  
FGF10  
FGG  
FIGF  
FLT3LG  
FN1  
GAST  
GAS6  
GC  
GCG  
MSTN  
GDF9  
GDNF  
GH1  
GH2  
GHRH  
GIF  
GIP  
GNRH1  
CXCL1  
CXCL2  
CXCL3  
GRP  
HCRT  
HGF  
HGFA  
NRG1  
HMGB1  
HP  
TNC  
IFNA1  
IFNA2  
IFNA5  
IFNA8  
IFNB1  
IFNG  
IFNW1  
IGF1  
IGF2  
IGFBP3  
CYR61

FLT1  
FLT3  
FLT4  
FPR1  
DARC  
GALR1  
GCGR  
GFRA1  
GFRA2  
GFRA3  
GHR  
GHRHR  
GHSR  
GIPR  
GLP1R  
GNRHR  
GP1BA  
GP1BB  
CCR10  
XCR1  
NPBWR1  
NPBWR2  
CXCR3  
PRLHR  
UTS2R  
MCHR1  
MLNR  
GRPR  
HCRTR1  
HCRTR2  
ICAM1  
IFNAR1  
IFNAR2  
IFNGR1  
IFNGR2  
IGF1R  
IGF2R  
IL1R1  
IL1RAP  
IL2RA  
IL2RB  
IL2RG  
IL3RA  
IL4R  
IL5RA  
IL6R  
IL6ST

CALR  
CCK  
CCK  
CCL1  
CCL1  
CCL11  
CCL11  
CCL11  
CCL11  
CCL11  
CCL11  
CCL12  
CCL13  
CCL13  
CCL13  
CCL13  
CCL13  
CCL13  
CCL14  
CCL14  
CCL14  
CCL14  
CCL15  
CCL15  
CCL16  
CCL16  
CCL16  
CCL16  
CCL16  
CCL16  
CCL17  
CCL17  
CCL17  
CCL19  
CCL19  
CCL19  
CCL19  
CCL2  
CCL2  
CCL2  
CCL2  
CCL2  
CCL2  
CCL2  
CCL2  
CCL2  
CCL20  
CCL20

LRP1  
CCKAR  
CCKBR  
CCR1  
CCR8  
CCBP2  
CCR2  
CCR3  
CCR5  
CCRL1  
CXCR3  
CCBP2  
CCBP2  
CCR2  
CCR3  
CCR5  
CCRL1  
CXCR3  
CCBP2  
CCR1  
CCR3  
CCR5  
CCR1  
CCR3  
CCR1  
CCR2  
CCR5  
CCR8  
CXCR5  
CCR4  
CCR8  
DARC  
CCBP2  
CCR10  
CCR7  
CCRL1  
CCBP2  
CCR1  
CCR10  
CCR2  
CCR3  
CCR5  
CCRL1  
CCRL2  
DARC  
CCR6  
CXCR3

IGHG1  
IHH  
IL1A  
IL1B  
IL2  
IL3  
IL4  
IL5  
IL6  
IL7  
IL8  
IL9  
IL10  
IL11  
IL12A  
IL13  
IL15  
IL17A  
IL18  
INH A  
INHBA  
INHBB  
INHBC  
CXCL10  
INS  
INSL3  
KISS1  
KNG1  
LAMA2  
LAMA3  
LAMA4  
LAMA5  
LAMB1  
LAMB2  
LAMB3  
LAMC1  
LBP  
LCN1  
LCN2  
LEP  
LGALS1  
LGALS3  
LGALS3BP  
LHB  
LIF  
LIPC  
LPA

IL7R  
CXCR1  
CXCR2  
IL9R  
IL10RA  
IL10RB  
IL11RA  
IL12B  
IL12RB1  
IL12RB2  
IL13RA1  
IL13RA2  
IL15RA  
TNFRSF9  
INSR  
ITGA6  
ITGA1  
ITGA2  
ITGA2B  
ITGA3  
ITGA4  
ITGA5  
ITGA9  
ITGAD  
ITGAM  
ITGAV  
ITGAX  
ITGB1  
ITGB3  
ITGB4  
ITGB5  
ITGB6  
ITGB7  
ITGB8  
KDR  
KIT  
LDLR  
LEPR  
LHCGR  
LIFR  
LRP1  
LRP2  
LRP6  
LRP5  
LTBP1  
LTBR  
MAS1

CCL21 CCBP2  
CCL21 CCR10  
CCL21 CCR7  
CCL21 CCRL1  
CCL21 CXCR3  
CCL22 CCR4  
CCL23 CCR1  
CCL24 CCR3  
CCL25 CCBP2  
CCL25 CCR10  
CCL25 CCR9  
CCL25 CCRL1  
CCL26 CCR1  
CCL26 CCR3  
CCL27 CCBP2  
CCL27 CCR10  
CCL28 CCBP2  
CCL28 CCR10  
CCL28 CCR3  
CCL3 CCBP2  
CCL3 CCR1  
CCL3 CCR3  
CCL3 CCR4  
CCL3 CCR5  
CCL3 CXCR5  
CCL3L1 CCR1  
CCL3L1 CCR3  
CCL3L1 CCR5  
CCL4 CCBP2  
CCL4 CCR1  
CCL4 CCR3  
CCL4 CCR5  
CCL4 CCR8  
CCL4 CXCR5  
CCL5 CCBP2  
CCL5 CCR1  
CCL5 CCR3  
CCL5 CCR4  
CCL5 CCR5  
CCL5 CCRL1  
CCL5 CXCR3  
CCL5 CXCR5  
CCL5 DARC  
CCL7 CCBP2  
CCL7 CCR1  
CCL7 CCR10  
CCL7 CCR2





PPY  
SRGN  
PRL  
PSPN  
PROC  
RELN  
PYY  
PTH  
PTHLH  
PTN  
REN  
RLN1  
RLN2  
S100A12  
S100B  
SAA1  
SCT  
CCL1  
CCL2  
CCL3  
CCL3L1  
CCL4  
CCL5  
CCL7  
CCL8  
CCL11  
CCL13  
CCL14  
CCL15  
CCL16  
CCL17  
CCL19  
CCL20  
CCL21  
CCL22  
CCL23  
CCL24  
CCL25  
CXCL6  
CXCL11  
CXCL5  
XCL1  
CX3CL1  
CXCL12  
SECTM1  
SEMA3F  
SFTPD

SSTR3  
SSTR4  
SSTR5  
TACR2  
TACR1  
TACR3  
TEK  
TFR2  
TFRC  
TGFB1  
TGFB2  
TGFB3  
THBD  
TIE1  
TNFRSF1A  
TNFRSF1B  
TRHR  
TSHR  
TNFRSF4  
TYRO3  
VIPR1  
VIPR2  
VLDLR  
ZP2  
LRP8  
IL1R2  
CXCR4  
FZD5  
CUBN  
FZD1  
FZD4  
FZD6  
FZD8  
FZD9  
LTBP4  
ATRN  
ITGA8  
UNC5C  
PTCH2  
TNFRSF25  
TNFRSF14  
TNFRSF6B  
TNFRSF18  
TNFRSF11A  
TNFRSF10D  
TNFRSF10C  
TNFRSF10B

COL2A1 DDR1  
COL2A1 ITGA2B  
COL3A1 DDR1  
COL3A1 DDR2  
COL4A1 CD36  
COL4A1 CD93  
COL4A2 ANTXR2  
COL4A2 CD36  
COL4A2 CD93  
COL4A3 ANTXR2  
COL4A3 CD93  
COL4A3 ITGAV  
COL4A3 ITGB3  
COL4A4 ANTXR2  
COL4A4 CD93  
COL4A5 CD93  
COL4A6 CD93  
COL5A2 DDR1  
COL6A1 CD36  
COL6A3 ITGA1  
COL6A3 ITGA2  
COL6A3 ITGA5  
COL6A3 ITGB1  
COL6A3 ITGB3  
COL8A1 ITGA1  
COL8A1 ITGA2  
CORT GHSR  
CORT MRGPRX2  
CORT SSTR1  
CORT SSTR2  
CORT SSTR3  
CORT SSTR4  
CORT SSTR5  
CREG1 IGF2R  
CRELD2 CHRNA4  
CRELD2 CHRN2  
CRH CRHR1  
CRH CRHR2  
CRLF1 CNTFR  
CSF1 CSF1R  
CSF2 CSF2RA  
CSF2 CSF2RB  
CSF2 CSF3R  
CSF2 IL3RA  
CSF3 CSF3R  
CTF1 IL6ST  
CTF1 LIFR

|         |           |        |          |
|---------|-----------|--------|----------|
| SHH     | TNFRSF10A | CTGF   | ERBB4    |
| SLIT1   | IL18RAP   | CTGF   | ITGA5    |
| SLIT3   | IL1RL2    | CTGF   | LRP1     |
| SIGLEC1 | IL18R1    | CX3CL1 | CX3CR1   |
| SPP1    | GALR2     | CXCL1  | CXCR1    |
| SST     | NRP2      | CXCL1  | CXCR2    |
| XCL2    | NRP1      | CXCL1  | DARC     |
| TAC1    | F2RL3     | CXCL10 | CCR3     |
| TAC3    | CCRL2     | CXCL10 | CXCR3    |
| TF      | IL1RL1    | CXCL11 | CCR3     |
| TG      | OSMR      | CXCL11 | CXCR3    |
| TGFA    | CD163     | CXCL12 | CCR10    |
| TGFB1   | GLP2R     | CXCL12 | CCR4     |
| TGFB111 | ZFYVE9    | CXCL12 | CXCR4    |
| TGFB2   | NRXN1     | CXCL13 | CCR10    |
| TGFB3   | IL27RA    | CXCL13 | CCRL1    |
| THBS1   | ATP6AP2   | CXCL13 | CXCR3    |
| THPO    | CALCRL    | CXCL13 | CXCR5    |
| TIMP3   | RAMP2     | CXCL16 | CXCR6    |
| TNF     | RAMP1     | CXCL2  | CXCR1    |
| TRH     | NMUR1     | CXCL2  | CXCR2    |
| TSHB    | CLEC4M    | CXCL3  | CXCR1    |
| TTR     | MERTK     | CXCL3  | CXCR2    |
| TNFSF4  | PROCR     | CXCL5  | CXCR1    |
| UCN     | CXCR6     | CXCL5  | CXCR2    |
| SCGB1A1 | CCR9      | CXCL5  | DARC     |
| COL14A1 | NPFFR2    | CXCL6  | CXCR1    |
| VEGFA   | EDAR      | CXCL6  | CXCR2    |
| VEGFB   | IL11RA1   | CXCL9  | CCR3     |
| VEGFC   | ZP3R      | CXCL9  | CXCR3    |
| VIP     | KLRK1     | CYR61  | ITGAD    |
| VTN     | CD93      | CYR61  | ITGAV    |
| VWF     | PLXND1    | CYR61  | ITGB5    |
| WNT1    | NPTXR     | DCD    | TNFRSF14 |
| WNT2    | TNFRSF13B | DHH    | PTCH1    |
| WNT3    | NTSR2     | DHH    | PTCH2    |
| WNT5A   | IL17RA    | DKK1   | LRP5     |
| WNT7A   | IL21R     | DKK1   | LRP6     |
| XDH     | SLC22A17  | DKK2   | LRP6     |
| ZP3     | TNFRSF12A | DLK1   | NOTCH2   |
| SEMA3B  | CCRL1     | DLL1   | NOTCH1   |
| FGF23   | LRP1B     | DLL1   | NOTCH2   |
| GDF5    | ADAM22    | DLL1   | NOTCH3   |
| TNFSF11 | IL20RA    | DPP4   | PTPRC    |
| NPFF    | IL20RB    | DSCAM  | DCC      |
| TNFSF14 | FGFRL1    | EBI3   | IL27RA   |
| TNFSF13 | ROBO4     | EDA    | EDA2R    |

TNFSF12  
TNFSF10  
TNFSF9  
DLK1  
CREG1  
FGF18  
FGF17  
WISP2  
APLN  
TNFSF18  
ARTN  
ANGPTL1  
BMP15  
LGI1  
CRLF1  
SLIT2  
ADIPOQ  
NTN1  
NRG2  
CLCA2  
SEMA3E  
FGF19  
TNFSF15  
EDIL3  
EBI3  
GDF11  
CCL26  
SEMA3A  
SEMA3C  
CXCL13  
TNFSF13B  
NRG3  
CCL27  
NMU  
UTS2  
IL24  
ZPBP  
EMILIN1  
INSL6  
NXPH3  
NXPH2  
PDAP1  
CCL12  
DKK1  
CLCF1  
DKK2  
IL17B

IL17RB  
LMBR1L  
NMUR2  
IL22RA1  
RXFP1  
EDA2R  
GFRA4  
NPFFR1  
TNFRSF23  
TNFRSF22  
ADIPOR2  
TM2D1  
MCHR2  
KISS1R  
IL17RC  
UNC5A  
TNFRSF13C  
IL22RA2  
MRGPRX2  
ANTXR2  
RXFP2  
ACVR1C  
GPR151  
IL23R  
AMOT  
IFNLR1  
TRHR2  
UNC5B  
EPHA6  
RXFP4  
CCR2

EDA EDAR  
EDIL3 ITGAV  
EDN1 EDNRA  
EDN1 EDNRB  
EDN3 EDNRA  
EDN3 EDNRB  
EFNA1 EPHA1  
EFNA1 EPHA2  
EFNA1 EPHA3  
EFNA1 EPHA4  
EFNA1 EPHA5  
EFNA1 EPHA6  
EFNA1 EPHA7  
EFNA1 EPHA8  
EFNA1 EPHB1  
EFNA4 EPHA2  
EFNA4 EPHA4  
EFNA4 EPHA5  
EFNA4 EPHA7  
EFNA4 EPHA8  
EGF EGFR  
EGF ERBB2  
EGF ERBB3  
EMILIN1 ITGA4  
EMILIN1 ITGB1  
EPO EPOR  
EREG EGFR  
EREG ERBB4  
F11 GP1BA  
F12 CD93  
F12 GP1BA  
F2 F2R  
F2 F2RL1  
F2 F2RL2  
F2 F2RL3  
F2 GP1BA  
F2 ITGA2B  
F2 ITGA5  
F2 ITGB3  
F2 THBD  
F8 ASGR2  
F8 LRP1  
FASLG FAS  
FASLG TNFRSF10B  
FASLG TNFRSF6B  
FBLN1 ITGB1  
FBLN2 ITGB3

ANGPTL3  
DLL1  
IL19  
NXPH1  
IL20  
IL22  
DHH  
PRLH  
GAL  
ANGPT4  
IL23A  
GHRL  
TLR9  
WNT4  
IL26  
PDGFC  
CCL28  
CXCL16  
IL21  
NTN4  
IL25  
CRELD2  
PDGFD  
ULBP2  
COL18A1  
JAM3  
IL1F10  
TSLP  
WNT3A  
UCN2  
IL33  
IL17F  
UCN3  
DCD  
RLN3  
NRG4  
AGR3  
SEMA3D  
IL27  
NPNT  
NPB  
UTS2B  
IFNL2  
IFNL3  
IFNL1  
NPW  
LAMA1

FBN1 LTBP1  
FBN2 LTBP1  
FGA ITGA2B  
FGA ITGB3  
FGF1 FGFR1  
FGF1 FGFR2  
FGF1 FGFR3  
FGF1 FGFR4  
FGF1 NRP1  
FGF10 FGFR2  
FGF17 FGFR1  
FGF17 FGFR2  
FGF17 FGFR3  
FGF17 FGFR4  
FGF18 FGFR1  
FGF18 FGFR2  
FGF18 FGFR3  
FGF18 FGFR4  
FGF19 FGFR4  
FGF2 FGFR1  
FGF2 FGFR2  
FGF2 FGFR3  
FGF2 FGFR4  
FGF2 FGFRL1  
FGF2 NRP1  
FGF23 FGFR2  
FGF23 FGFR3  
FGF3 FGFR1  
FGF3 FGFR2  
FGF3 FGFR3  
FGF3 FGFR4  
FGF4 FGFR1  
FGF4 FGFR2  
FGF4 FGFR3  
FGF4 FGFR4  
FGF4 NRP1  
FGF5 FGFR1  
FGF5 FGFR2  
FGF5 FGFR3  
FGF5 FGFR4  
FGF6 FGFR1  
FGF6 FGFR2  
FGF6 FGFR3  
FGF6 FGFR4  
FGF7 FGFR1  
FGF7 FGFR2  
FGF7 FGFR3

AGRN  
GDF6  
SFTPA1  
SFTPA2  
MICA

|        |        |
|--------|--------|
| FGF7   | FGFR4  |
| FGF7   | NRP1   |
| FGF8   | FGFR1  |
| FGF8   | FGFR2  |
| FGF8   | FGFR3  |
| FGF8   | FGFR4  |
| FGF9   | FGFR1  |
| FGF9   | FGFR2  |
| FGF9   | FGFR3  |
| FGF9   | FGFR4  |
| FGG    | ICAM1  |
| FGG    | ITGAM  |
| FGG    | ITGB3  |
| FIGF   | FLT4   |
| FIGF   | KDR    |
| FLT3LG | FLT3   |
| FN1    | ITGA3  |
| FN1    | ITGA4  |
| FN1    | ITGA5  |
| FN1    | ITGA8  |
| FN1    | ITGAV  |
| FN1    | ITGB1  |
| FN1    | ITGB3  |
| FN1    | ITGB6  |
| FN1    | ITGB7  |
| FN1    | LTBP1  |
| GAL    | GALR1  |
| GAL    | GALR2  |
| GAL    | GPR151 |
| GAS6   | AXL    |
| GAS6   | MERTK  |
| GAS6   | TYRO3  |
| GAST   | CCKBR  |
| GC     | CUBN   |
| GC     | LRP2   |
| GCG    | GCGR   |
| GCG    | GIPR   |
| GCG    | GLP1R  |
| GCG    | GLP2R  |
| GDF11  | ACVR1B |
| GDF11  | ACVR1C |
| GDF11  | ACVR2B |
| GDF11  | TGFBR1 |
| GDF5   | ACVR1  |
| GDF5   | ACVR2A |
| GDF5   | ACVR2B |
| GDF5   | BMPR1A |

|       |         |
|-------|---------|
| GDF5  | BMPR1B  |
| GDF5  | BMPR2   |
| GDF6  | BMPR1A  |
| GDF6  | BMPR1B  |
| GDF6  | BMPR2   |
| GDF9  | ACVR2A  |
| GDF9  | BMPR1A  |
| GDF9  | BMPR1B  |
| GDF9  | BMPR2   |
| GDNF  | GFRA1   |
| GDNF  | GFRA2   |
| GDNF  | RET     |
| GH1   | GHR     |
| GH1   | PRLR    |
| GH2   | GHR     |
| GHRH  | GHRHR   |
| GHRL  | GHRHR   |
| GHRL  | GHSR    |
| GHRL  | MLNR    |
| GIF   | CUBN    |
| GIP   | GIPR    |
| GNRH1 | GNRHR   |
| GRP   | GRPR    |
| HBEGF | CD44    |
| HBEGF | EGFR    |
| HBEGF | ERBB4   |
| HCRT  | HCRTTR1 |
| HCRT  | HCRTTR2 |
| HGF   | MET     |
| HGFAC | MET     |
| HMGB1 | AGER    |
| HP    | CD163   |
| HP    | CD22    |
| IFNA1 | CR2     |
| IFNA1 | IFNAR2  |
| IFNA2 | IFNAR1  |
| IFNA2 | IFNAR2  |
| IFNA5 | IFNAR2  |
| IFNA8 | IFNAR1  |
| IFNA8 | IFNAR2  |
| IFNB1 | IFNAR1  |
| IFNB1 | IFNAR2  |
| IFNG  | IFNGR1  |
| IFNG  | IFNGR2  |
| IFNL1 | IL10RB  |
| IFNL1 | IFNLR1  |
| IFNL2 | IL10RB  |

|        |         |
|--------|---------|
| IFNL2  | IFNLR1  |
| IFNL3  | IL10RB  |
| IFNL3  | IFNLR1  |
| IFNW1  | IFNAR1  |
| IGF1   | IGF1R   |
| IGF2   | IGF1R   |
| IGF2   | IGF2R   |
| IGF2   | INSR    |
| IGFBP3 | IGF1R   |
| IGFBP3 | LTBP1   |
| IGHG1  | FCGR2B  |
| IGHG1  | FCGR3A  |
| IGHG1  | FCGR3B  |
| IHH    | PTCH1   |
| IHH    | PTCH2   |
| IL10   | IL10RA  |
| IL10   | IL10RB  |
| IL11   | IL11RA  |
| IL11   | IL11RA1 |
| IL12A  | IL12B   |
| IL12A  | IL12RB1 |
| IL12A  | IL12RB2 |
| IL13   | IL13RA1 |
| IL13   | IL13RA2 |
| IL13   | IL4R    |
| IL15   | IL15RA  |
| IL15   | IL2RB   |
| IL15   | IL2RG   |
| IL17A  | IL17RA  |
| IL17A  | IL17RC  |
| IL17B  | IL17RB  |
| IL17F  | IL17RA  |
| IL17F  | IL17RC  |
| IL18   | IL18R1  |
| IL18   | IL18RAP |
| IL18   | IL1RL2  |
| IL19   | IL20RA  |
| IL19   | IL20RB  |
| IL1A   | IL1R1   |
| IL1A   | IL1R2   |
| IL1A   | IL1RAP  |
| IL1B   | IL1R1   |
| IL1B   | IL1R2   |
| IL1B   | IL1RAP  |
| IL1F10 | IL1R1   |
| IL2    | IL21R   |
| IL2    | IL2RA   |



|       |         |
|-------|---------|
| IL2   | IL2RB   |
| IL2   | IL2RG   |
| IL20  | IL20RA  |
| IL20  | IL20RB  |
| IL21  | IL21R   |
| IL21  | IL2RG   |
| IL22  | IL10RB  |
| IL22  | IL22RA1 |
| IL22  | IL22RA2 |
| IL23A | IL12B   |
| IL23A | IL12RB1 |
| IL23A | IL23R   |
| IL24  | IL20RA  |
| IL24  | IL20RB  |
| IL25  | IL17RA  |
| IL25  | IL17RB  |
| IL26  | IL20RA  |
| IL27  | IL27RA  |
| IL3   | CSF2RB  |
| IL3   | IL3RA   |
| IL33  | IL1RL1  |
| IL4   | IL13RA1 |
| IL4   | IL13RA2 |
| IL4   | IL2RG   |
| IL4   | IL4R    |
| IL5   | CSF2RB  |
| IL5   | IL5RA   |
| IL6   | IL6R    |
| IL6   | IL6ST   |
| IL7   | IL2RG   |
| IL7   | IL7R    |
| IL8   | CXCR1   |
| IL8   | CXCR2   |
| IL8   | DARC    |
| IL9   | IL2RG   |
| IL9   | IL9R    |
| INHA  | ACVR2A  |
| INHA  | TGFBR3  |
| INHBA | ACVR1   |
| INHBA | ACVR1B  |
| INHBA | ACVR2A  |
| INHBA | ACVR2B  |
| INHBA | ENG     |
| INHBA | TGFBR3  |
| INHBB | ACVR1   |
| INHBB | ACVR1B  |
| INHBB | ACVR1C  |

|       |          |
|-------|----------|
| INHBB | ACVR2A   |
| INHBB | ACVR2B   |
| INHBC | ACVR1    |
| INHBC | ACVR1B   |
| INHBC | ACVR2A   |
| INHBC | ACVR2B   |
| INS   | IGF1R    |
| INS   | INSR     |
| INS   | LRP2     |
| INSL3 | RXFP2    |
| INSL6 | ALK      |
| JAG1  | NOTCH1   |
| JAG1  | NOTCH2   |
| JAG1  | NOTCH3   |
| JAM3  | F2RL2    |
| JAM3  | ITGAM    |
| JAM3  | ITGAX    |
| KISS1 | KISS1R   |
| KITLG | KIT      |
| KNG1  | CD93     |
| KNG1  | GP1BA    |
| KNG1  | PLAUR    |
| LAMA1 | DAG1     |
| LAMA1 | ITGA1    |
| LAMA1 | ITGA2    |
| LAMA1 | ITGB1    |
| LAMA2 | DAG1     |
| LAMA2 | ITGA6    |
| LAMA3 | ITGA3    |
| LAMA4 | ITGA3    |
| LAMA4 | ITGA5    |
| LAMA4 | ITGB1    |
| LAMA4 | ITGB3    |
| LAMA5 | DAG1     |
| LAMA5 | ITGA6    |
| LAMA5 | ITGB4    |
| LAMB1 | ITGA6    |
| LAMB1 | ITGB4    |
| LAMB2 | ITGA6    |
| LAMB2 | ITGB4    |
| LAMB3 | ITGA6    |
| LAMC1 | ITGA6    |
| LAMC1 | ITGB4    |
| LBP   | CD14     |
| LCN1  | LMBR1L   |
| LCN2  | LRP2     |
| LCN2  | SLC22A17 |

|          |          |
|----------|----------|
| LEP      | LEPR     |
| LGALS1   | CD2      |
| LGALS1   | PTPRC    |
| LGALS3   | PTPRC    |
| LGALS3BP | CD14     |
| LGALS3BP | ITGB1    |
| LGI1     | ADAM22   |
| LHB      | LHCGR    |
| LIF      | IL6ST    |
| LIF      | LIFR     |
| LIPC     | LRP1     |
| LPA      | LRP2     |
| LPL      | LRP1     |
| LPL      | LRP2     |
| LPL      | VLDLR    |
| LTA      | LTBR     |
| LTA      | TNFRSF1A |
| LTA      | TNFRSF1B |
| LTB      | TNFRSF1A |
| LTF      | CD14     |
| LTF      | LRP1     |
| MATN1    | ITGA1    |
| MBL2     | CD93     |
| MDK      | ALK      |
| MDK      | LRP1     |
| MDK      | LRP2     |
| MICA     | KLRK1    |
| MLN      | MLNR     |
| MMP1     | CD44     |
| MMP1     | F2R      |
| MMP13    | LRP1     |
| MMP7     | CD44     |
| MMP9     | CD44     |
| MST1     | MST1R    |
| MSTN     | ACVR2B   |
| NCAM1    | FGFR1    |
| NCAM1    | GFRA1    |
| NDP      | FZD4     |
| NGF      | NGFR     |
| NGF      | NTRK1    |
| NGF      | ROR1     |
| NGF      | SORT1    |
| NID1     | ITGAV    |
| NID1     | ITGB1    |
| NID1     | ITGB3    |
| NMB      | NMBR     |
| NMU      | NMUR1    |

|       |        |
|-------|--------|
| NMU   | NMUR2  |
| NOV   | ITGAV  |
| NOV   | ITGB1  |
| NOV   | ITGB3  |
| NOV   | NOTCH1 |
| NPB   | NPBWR1 |
| NPB   | NPBWR2 |
| NPFF  | NPFFR1 |
| NPFF  | NPFFR2 |
| NPNT  | ITGA8  |
| NPPA  | NPR1   |
| NPPA  | NPR2   |
| NPPA  | NPR3   |
| NPPB  | NPR1   |
| NPPB  | NPR2   |
| NPPB  | NPR3   |
| NPPC  | NPR2   |
| NPPC  | NPR3   |
| NPTX2 | NPTXR  |
| NPW   | NPBWR1 |
| NPW   | NPBWR2 |
| NPY   | MC4R   |
| NPY   | NPFFR2 |
| NPY   | NPY1R  |
| NPY   | NPY2R  |
| NPY   | NPY5R  |
| NPY   | NPY4R  |
| NRG1  | EGFR   |
| NRG1  | ERBB2  |
| NRG1  | ERBB3  |
| NRG1  | ERBB4  |
| NRG2  | ERBB3  |
| NRG2  | ERBB4  |
| NRG3  | ERBB4  |
| NRG4  | ERBB4  |
| NRTN  | GFRA1  |
| NRTN  | GFRA2  |
| NTF3  | NTRK1  |
| NTF3  | NTRK2  |
| NTF3  | NTRK3  |
| NTF4  | NGFR   |
| NTF4  | NTRK2  |
| NTN1  | DCC    |
| NTN1  | NEO1   |
| NTN1  | UNC5A  |
| NTN1  | UNC5B  |
| NTN1  | UNC5C  |

|       |        |
|-------|--------|
| NTN3  | NEO1   |
| NTN4  | NEO1   |
| NTS   | NTSR1  |
| NTS   | NTSR2  |
| NXPH1 | NRXN1  |
| NXPH2 | NRXN1  |
| NXPH3 | NRXN1  |
| ORM1  | CCR5   |
| OSM   | IL6ST  |
| OSM   | LIFR   |
| OSM   | OSMR   |
| OXT   | OXTR   |
| PDAP1 | PDGFRB |
| PDGFA | PDGFRA |
| PDGFB | LRP1   |
| PDGFB | PDGFRA |
| PDGFB | PDGFRB |
| PDGFC | PDGFRA |
| PDGFD | PDGFRB |
| PEBP1 | ADRBK1 |
| PF4   | CXCR3  |
| PF4   | DARC   |
| PF4   | LDLR   |
| PGF   | FLT1   |
| PGF   | NRP1   |
| PGF   | NRP2   |
| PLAT  | LRP1   |
| PLAT  | LRP1B  |
| PLAU  | LRP2   |
| PLAU  | PLAUR  |
| PLG   | AMOT   |
| PMCH  | MCHR1  |
| PMCH  | MCHR2  |
| PNOC  | OPRL1  |
| POMC  | MC1R   |
| POMC  | MC2R   |
| POMC  | MC4R   |
| POMC  | MC5R   |
| PPBP  | CXCR1  |
| PPBP  | CXCR2  |
| PPY   | NPY4R  |
| PRL   | PRLR   |
| PRLH  | PRLHR  |
| PROC  | PROCR  |
| PSPN  | GFRA4  |
| PTH   | PTH1R  |
| PTH   | PTH2R  |

|          |         |
|----------|---------|
| PTHLH    | PTH1R   |
| PTN      | ALK     |
| PYY      | NPY1R   |
| PYY      | NPY2R   |
| PYY      | NPY5R   |
| PYY      | NPY4R   |
| RELN     | LRP8    |
| RELN     | VLDLR   |
| REN      | ATP6AP2 |
| RLN1     | RXFP1   |
| RLN2     | RXFP1   |
| RLN2     | RXFP2   |
| RLN3     | RXFP1   |
| RLN3     | RXFP4   |
| S100A12  | AGER    |
| S100B    | AGER    |
| SAA1     | FPR1    |
| SCGB1A1  | CUBN    |
| SCGB1A1  | LRP2    |
| SCT      | SCTR    |
| SECTM1   | CD7     |
| SEMA3A   | NRP1    |
| SEMA3B   | NRP1    |
| SEMA3B   | NRP2    |
| SEMA3C   | NRP1    |
| SEMA3C   | NRP2    |
| SEMA3D   | NRP1    |
| SEMA3E   | PLXND1  |
| SEMA3F   | NRP1    |
| SEMA3F   | NRP2    |
| SERPINE1 | LRP1B   |
| SERPINE1 | LRP2    |
| SERPINE1 | PLAUR   |
| SFTPA1   | DMBT1   |
| SFTPA2   | CD93    |
| SFTPD    | DMBT1   |
| SHH      | PTCH1   |
| SHH      | PTCH2   |
| SIGLEC1  | SPN     |
| SLIT1    | ROBO1   |
| SLIT2    | ROBO1   |
| SLIT2    | ROBO2   |
| SLIT2    | ROBO4   |
| SLIT3    | ROBO2   |
| SPP1     | CD44    |
| SRGN     | CD44    |
| SST      | SSTR1   |

|         |          |
|---------|----------|
| SST     | SSTR2    |
| SST     | SSTR3    |
| SST     | SSTR4    |
| SST     | SSTR5    |
| TAC1    | TACR1    |
| TAC1    | TACR2    |
| TAC1    | TACR3    |
| TAC3    | TACR1    |
| TAC3    | TACR2    |
| TAC3    | TACR3    |
| TF      | TFR2     |
| TF      | TFRC     |
| TG      | ASGR1    |
| TG      | LRP2     |
| TGFA    | EGFR     |
| TGFA    | ERBB2    |
| TGFA    | ERBB4    |
| TGFB1   | ACVRL1   |
| TGFB1   | ENG      |
| TGFB1   | LTBP4    |
| TGFB1   | TGFBR1   |
| TGFB1   | TGFBR2   |
| TGFB1   | TGFBR3   |
| TGFB1I1 | TGFBR2   |
| TGFB2   | ENG      |
| TGFB2   | TGFBR1   |
| TGFB2   | TGFBR2   |
| TGFB2   | TGFBR3   |
| TGFB3   | ACVRL1   |
| TGFB3   | ENG      |
| TGFB3   | TGFBR1   |
| TGFB3   | TGFBR2   |
| TGFB3   | TGFBR3   |
| THBS1   | CD36     |
| THBS1   | CD47     |
| THPO    | MPL      |
| TIMP3   | AGTR2    |
| TIMP3   | EFEMP1   |
| TLR9    | AGER     |
| TNC     | ITGA5    |
| TNC     | ITGA8    |
| TNC     | ITGA9    |
| TNC     | ITGB1    |
| TNC     | ITGB6    |
| TNF     | LTBR     |
| TNF     | TNFRSF1A |
| TNF     | TNFRSF1B |

|          |           |
|----------|-----------|
| TNFSF10  | TNFRSF10A |
| TNFSF10  | TNFRSF10B |
| TNFSF10  | TNFRSF10C |
| TNFSF10  | TNFRSF10D |
| TNFSF10  | TNFRSF11B |
| TNFSF10  | TNFRSF22  |
| TNFSF10  | TNFRSF23  |
| TNFSF11  | TNFRSF11A |
| TNFSF11  | TNFRSF11B |
| TNFSF12  | TNFRSF12A |
| TNFSF12  | TNFRSF25  |
| TNFSF13  | TNFRSF11B |
| TNFSF13  | TNFRSF13B |
| TNFSF13  | TNFRSF14  |
| TNFSF13  | TNFRSF17  |
| TNFSF13  | TNFRSF1A  |
| TNFSF13B | TNFRSF13B |
| TNFSF13B | TNFRSF13C |
| TNFSF13B | TNFRSF17  |
| TNFSF14  | LTBR      |
| TNFSF14  | TNFRSF14  |
| TNFSF14  | TNFRSF6B  |
| TNFSF15  | TNFRSF25  |
| TNFSF15  | TNFRSF6B  |
| TNFSF18  | TNFRSF18  |
| TNFSF4   | TNFRSF4   |
| TNFSF8   | TNFRSF8   |
| TNFSF9   | TNFRSF9   |
| TRH      | TRHR      |
| TRH      | TRHR2     |
| TSHB     | TSHR      |
| TSLP     | IL7R      |
| TTR      | AGER      |
| TTR      | DDR1      |
| TTR      | LRP2      |
| UCN      | CRHR1     |
| UCN      | CRHR2     |
| UCN2     | CRHR2     |
| UCN3     | CRHR2     |
| ULBP2    | KLRK1     |
| UTS2     | UTS2R     |
| UTS2B    | UTS2R     |
| VEGFA    | FLT1      |
| VEGFA    | KDR       |
| VEGFA    | NRP1      |
| VEGFA    | NRP2      |
| VEGFB    | FLT1      |



|       |        |
|-------|--------|
| VEGFB | NRP1   |
| VEGFC | FLT4   |
| VEGFC | KDR    |
| VIP   | VIPR1  |
| VIP   | VIPR2  |
| VTN   | ITGA8  |
| VTN   | ITGAD  |
| VTN   | ITGAV  |
| VTN   | ITGB3  |
| VTN   | ITGB5  |
| VTN   | ITGB8  |
| VWF   | GP1BA  |
| VWF   | GP1BB  |
| VWF   | ITGA2B |
| WISP2 | IGF1R  |
| WISP2 | IGF2R  |
| WNT1  | FZD8   |
| WNT1  | FZD9   |
| WNT1  | LRP5   |
| WNT1  | LRP6   |
| WNT1  | RYK    |
| WNT2  | FZD1   |
| WNT2  | FZD9   |
| WNT3  | FZD1   |
| WNT3A | FZD1   |
| WNT3A | LRP1   |
| WNT3A | LRP6   |
| WNT3A | RYK    |
| WNT4  | FZD6   |
| WNT5A | FZD1   |
| WNT5A | FZD5   |
| WNT7A | FZD5   |
| WNT7A | FZD9   |
| XCL1  | XCR1   |
| XCL2  | XCR1   |
| XDH   | BTN1A1 |
| ZP3   | ZP3R   |
| ZPBP  | ZP2    |

Supplementary Table S4

HFHSD

| SECRETORY TISSUE | RECEPTOR TISSUE | Number of Interactions |       |        |        |        |        |        |         |
|------------------|-----------------|------------------------|-------|--------|--------|--------|--------|--------|---------|
|                  |                 | Day 1                  | Day 6 | Day 14 | Day 35 | Day 56 | Day 77 | Day 98 | Day 119 |
| Adipose_BA       | Adipose_BA      | 53                     | 0     | 0      | 0      | 0      | 2      | 28     | 9       |
| Adipose_BA       | Adipose_EA      | 17                     | 1     | 0      | 0      | 0      | 0      | 9      | 0       |
| Adipose_BA       | Adipose_SA      | 28                     | 1     | 0      | 0      | 0      | 1      | 0      | 1       |
| Adipose_BA       | Hippo           | 15                     | 0     | 0      | 0      | 0      | 0      | 0      | 0       |
| Adipose_BA       | Liver           | 24                     | 0     | 3      | 1      | 0      | 0      | 4      | 0       |
| Adipose_BA       | Skeletal        | 75                     | 0     | 1      | 0      | 0      | 0      | 0      | 0       |
| Adipose_BA       | Spleen          | 77                     | 0     | 5      | 0      | 0      | 1      | 3      | 2       |
| Adipose_BA       | svc_BA          | 41                     | 0     | 0      | 2      | 0      | 0      | 17     | 3       |
| Adipose_BA       | svc_EA          | 5                      | 3     | 0      | 0      | 0      | 0      | 1      | 3       |
| Adipose_BA       | svc_SA          | 46                     | 3     | 0      | 0      | 0      | 0      | 0      | 0       |
| Adipose_EA       | Adipose_BA      | 23                     | 0     | 0      | 0      | 0      | 2      | 13     | 6       |
| Adipose_EA       | Adipose_EA      | 6                      | 2     | 0      | 0      | 2      | 0      | 3      | 3       |
| Adipose_EA       | Adipose_SA      | 12                     | 4     | 0      | 0      | 0      | 2      | 0      | 0       |
| Adipose_EA       | Hippo           | 6                      | 0     | 0      | 0      | 0      | 0      | 0      | 0       |
| Adipose_EA       | Liver           | 13                     | 1     | 0      | 0      | 0      | 0      | 0      | 0       |
| Adipose_EA       | Skeletal        | 32                     | 0     | 0      | 0      | 0      | 0      | 0      | 0       |
| Adipose_EA       | Spleen          | 29                     | 0     | 0      | 2      | 0      | 0      | 2      | 1       |
| Adipose_EA       | svc_BA          | 16                     | 3     | 0      | 1      | 0      | 0      | 5      | 7       |
| Adipose_EA       | svc_EA          | 5                      | 6     | 0      | 0      | 0      | 0      | 0      | 0       |
| Adipose_EA       | svc_SA          | 14                     | 8     | 0      | 0      | 0      | 0      | 0      | 0       |
| Adipose_SA       | Adipose_BA      | 29                     | 0     | 0      | 0      | 0      | 3      | 4      | 2       |
| Adipose_SA       | Adipose_EA      | 10                     | 5     | 0      | 0      | 0      | 0      | 0      | 1       |
| Adipose_SA       | Adipose_SA      | 12                     | 3     | 0      | 0      | 0      | 2      | 0      | 0       |
| Adipose_SA       | Hippo           | 6                      | 0     | 0      | 0      | 0      | 1      | 0      | 0       |
| Adipose_SA       | Liver           | 12                     | 1     | 0      | 0      | 0      | 0      | 1      | 0       |
| Adipose_SA       | Skeletal        | 38                     | 0     | 0      | 0      | 1      | 0      | 0      | 0       |
| Adipose_SA       | Spleen          | 37                     | 0     | 0      | 1      | 0      | 0      | 0      | 0       |
| Adipose_SA       | svc_BA          | 21                     | 4     | 1      | 1      | 0      | 0      | 1      | 1       |
| Adipose_SA       | svc_EA          | 4                      | 7     | 1      | 0      | 0      | 0      | 0      | 0       |
| Adipose_SA       | svc_SA          | 20                     | 11    | 0      | 0      | 0      | 0      | 0      | 0       |
| Hippo            | Adipose_BA      | 13                     | 0     | 0      | 0      | 0      | 0      | 1      | 0       |
| Hippo            | Adipose_EA      | 5                      | 0     | 0      | 0      | 0      | 0      | 0      | 0       |
| Hippo            | Adipose_SA      | 11                     | 0     | 0      | 0      | 0      | 0      | 0      | 0       |
| Hippo            | Hippo           | 4                      | 0     | 0      | 0      | 0      | 1      | 0      | 0       |
| Hippo            | Liver           | 14                     | 0     | 1      | 0      | 2      | 0      | 0      | 0       |
| Hippo            | Skeletal        | 24                     | 0     | 1      | 0      | 0      | 1      | 0      | 0       |
| Hippo            | Spleen          | 21                     | 0     | 0      | 0      | 0      | 0      | 0      | 0       |
| Hippo            | svc_BA          | 8                      | 0     | 4      | 0      | 0      | 0      | 0      | 0       |
| Hippo            | svc_EA          | 1                      | 1     | 0      | 0      | 0      | 0      | 0      | 0       |
| Hippo            | svc_SA          | 8                      | 1     | 0      | 0      | 1      | 0      | 0      | 0       |
| Liver            | Adipose_BA      | 16                     | 0     | 1      | 0      | 0      | 0      | 3      | 1       |
| Liver            | Adipose_EA      | 4                      | 0     | 0      | 0      | 0      | 0      | 2      | 0       |
| Liver            | Adipose_SA      | 12                     | 0     | 0      | 1      | 0      | 0      | 0      | 0       |
| Liver            | Hippo           | 6                      | 0     | 1      | 0      | 0      | 0      | 0      | 0       |
| Liver            | Liver           | 9                      | 1     | 1      | 3      | 0      | 0      | 2      | 0       |
| Liver            | Skeletal        | 29                     | 0     | 0      | 0      | 0      | 0      | 0      | 0       |
| Liver            | Spleen          | 28                     | 0     | 1      | 5      | 0      | 0      | 0      | 0       |
| Liver            | svc_BA          | 12                     | 0     | 0      | 6      | 0      | 0      | 3      | 0       |
| Liver            | svc_EA          | 1                      | 1     | 0      | 0      | 0      | 0      | 0      | 0       |
| Liver            | svc_SA          | 18                     | 0     | 0      | 0      | 1      | 0      | 0      | 0       |
| Skeletal         | Adipose_BA      | 65                     | 0     | 1      | 0      | 0      | 0      | 2      | 0       |
| Skeletal         | Adipose_EA      | 15                     | 0     | 0      | 0      | 0      | 1      | 2      | 0       |
| Skeletal         | Adipose_SA      | 31                     | 0     | 1      | 0      | 0      | 2      | 0      | 0       |
| Skeletal         | Hippo           | 13                     | 0     | 0      | 0      | 0      | 1      | 0      | 0       |
| Skeletal         | Liver           | 28                     | 0     | 2      | 0      | 0      | 0      | 0      | 0       |
| Skeletal         | Skeletal        | 93                     | 0     | 0      | 0      | 0      | 0      | 0      | 0       |
| Skeletal         | Spleen          | 82                     | 0     | 1      | 0      | 0      | 0      | 0      | 0       |
| Skeletal         | svc_BA          | 41                     | 1     | 0      | 0      | 0      | 0      | 1      | 0       |
| Skeletal         | svc_EA          | 10                     | 0     | 0      | 0      | 0      | 1      | 1      | 0       |
| Skeletal         | svc_SA          | 42                     | 2     | 0      | 0      | 0      | 0      | 0      | 0       |
| Spleen           | Adipose_BA      | 66                     | 0     | 1      | 0      | 0      | 0      | 0      | 5       |
| Spleen           | Adipose_EA      | 17                     | 1     | 0      | 0      | 0      | 0      | 0      | 0       |
| Spleen           | Adipose_SA      | 31                     | 1     | 1      | 0      | 0      | 0      | 0      | 0       |
| Spleen           | Hippo           | 12                     | 0     | 2      | 0      | 0      | 0      | 0      | 0       |

|        |            |    |    |   |   |   |   |    |   |
|--------|------------|----|----|---|---|---|---|----|---|
| Spleen | Liver      | 33 | 0  | 6 | 3 | 0 | 0 | 0  | 0 |
| Spleen | Skeletal   | 99 | 0  | 0 | 0 | 0 | 0 | 0  | 0 |
| Spleen | Spleen     | 93 | 0  | 3 | 3 | 0 | 0 | 0  | 1 |
| Spleen | svc_BA     | 44 | 1  | 2 | 5 | 0 | 0 | 0  | 2 |
| Spleen | svc_EA     | 9  | 1  | 1 | 0 | 0 | 0 | 0  | 0 |
| Spleen | svc_SA     | 43 | 4  | 0 | 0 | 1 | 0 | 0  | 0 |
| svc_BA | Adipose_BA | 15 | 0  | 0 | 0 | 0 | 0 | 14 | 8 |
| svc_BA | Adipose_EA | 5  | 9  | 0 | 0 | 0 | 0 | 3  | 0 |
| svc_BA | Adipose_SA | 8  | 4  | 0 | 3 | 0 | 0 | 0  | 0 |
| svc_BA | Hippo      | 4  | 1  | 0 | 0 | 0 | 0 | 2  | 0 |
| svc_BA | Liver      | 7  | 1  | 0 | 3 | 0 | 0 | 4  | 0 |
| svc_BA | Skeletal   | 20 | 1  | 0 | 0 | 0 | 0 | 0  | 0 |
| svc_BA | Spleen     | 25 | 0  | 0 | 5 | 0 | 0 | 2  | 4 |
| svc_BA | svc_BA     | 11 | 8  | 0 | 6 | 0 | 0 | 14 | 5 |
| svc_BA | svc_EA     | 0  | 5  | 0 | 0 | 0 | 0 | 4  | 2 |
| svc_BA | svc_SA     | 15 | 15 | 0 | 0 | 0 | 0 | 0  | 1 |
| svc_EA | Adipose_BA | 7  | 1  | 1 | 0 | 0 | 0 | 4  | 0 |
| svc_EA | Adipose_EA | 1  | 11 | 0 | 0 | 2 | 0 | 2  | 0 |
| svc_EA | Adipose_SA | 1  | 4  | 0 | 0 | 0 | 0 | 0  | 0 |
| svc_EA | Hippo      | 2  | 0  | 0 | 0 | 0 | 0 | 1  | 0 |
| svc_EA | Liver      | 1  | 1  | 1 | 0 | 0 | 0 | 0  | 0 |
| svc_EA | Skeletal   | 5  | 1  | 0 | 0 | 0 | 0 | 0  | 0 |
| svc_EA | Spleen     | 6  | 0  | 1 | 0 | 0 | 0 | 1  | 0 |
| svc_EA | svc_BA     | 1  | 9  | 1 | 0 | 0 | 0 | 6  | 0 |
| svc_EA | svc_EA     | 0  | 9  | 1 | 0 | 1 | 0 | 1  | 0 |
| svc_EA | svc_SA     | 3  | 19 | 0 | 0 | 2 | 0 | 0  | 0 |
| svc_SA | Adipose_BA | 29 | 1  | 0 | 0 | 0 | 0 | 0  | 0 |
| svc_SA | Adipose_EA | 7  | 13 | 0 | 0 | 1 | 0 | 1  | 0 |
| svc_SA | Adipose_SA | 15 | 7  | 0 | 0 | 0 | 0 | 0  | 0 |
| svc_SA | Hippo      | 5  | 0  | 0 | 0 | 0 | 0 | 1  | 0 |
| svc_SA | Liver      | 13 | 3  | 0 | 0 | 0 | 0 | 0  | 0 |
| svc_SA | Skeletal   | 41 | 1  | 0 | 0 | 1 | 0 | 0  | 0 |
| svc_SA | Spleen     | 45 | 0  | 0 | 0 | 1 | 0 | 1  | 0 |
| svc_SA | svc_BA     | 18 | 9  | 0 | 0 | 1 | 0 | 1  | 0 |
| svc_SA | svc_EA     | 2  | 13 | 0 | 0 | 1 | 0 | 0  | 0 |
| svc_SA | svc_SA     | 23 | 19 | 0 | 0 | 3 | 0 | 0  | 0 |

### HFHSD+Kal1

| SECRETORY TISSUE | RECEPTOR TISSUE | Number of Interactions |       |        |        |        |        |        |         |
|------------------|-----------------|------------------------|-------|--------|--------|--------|--------|--------|---------|
|                  |                 | Day 1                  | Day 6 | Day 14 | Day 35 | Day 56 | Day 77 | Day 98 | Day 119 |
| Adipose_BA       | Adipose_BA      | NA                     | NA    | NA     | 0      | 0      | 1      | 21     | 3       |
| Adipose_BA       | Adipose_EA      | NA                     | NA    | NA     | 0      | 0      | 1      | 0      | 0       |
| Adipose_BA       | Adipose_SA      | NA                     | NA    | NA     | 0      | 0      | 2      | 1      | 0       |
| Adipose_BA       | Hippo           | NA                     | NA    | NA     | 0      | 0      | 0      | 0      | 0       |
| Adipose_BA       | Liver           | NA                     | NA    | NA     | 1      | 0      | 0      | 7      | 0       |
| Adipose_BA       | Skeletal        | NA                     | NA    | NA     | 0      | 0      | 0      | 0      | 0       |
| Adipose_BA       | Spleen          | NA                     | NA    | NA     | 6      | 0      | 0      | 10     | 0       |
| Adipose_BA       | svc_BA          | NA                     | NA    | NA     | 2      | 0      | 0      | 2      | 2       |
| Adipose_BA       | svc_EA          | NA                     | NA    | NA     | 0      | 0      | 1      | 13     | 1       |
| Adipose_BA       | svc_SA          | NA                     | NA    | NA     | 1      | 0      | 1      | 2      | 1       |
| Adipose_EA       | Adipose_BA      | NA                     | NA    | NA     | 1      | 0      | 1      | 0      | 0       |
| Adipose_EA       | Adipose_EA      | NA                     | NA    | NA     | 0      | 0      | 1      | 0      | 0       |
| Adipose_EA       | Adipose_SA      | NA                     | NA    | NA     | 0      | 0      | 1      | 0      | 4       |
| Adipose_EA       | Hippo           | NA                     | NA    | NA     | 0      | 0      | 0      | 0      | 0       |
| Adipose_EA       | Liver           | NA                     | NA    | NA     | 1      | 0      | 0      | 0      | 0       |
| Adipose_EA       | Skeletal        | NA                     | NA    | NA     | 0      | 0      | 1      | 0      | 0       |
| Adipose_EA       | Spleen          | NA                     | NA    | NA     | 2      | 0      | 0      | 0      | 1       |
| Adipose_EA       | svc_BA          | NA                     | NA    | NA     | 1      | 0      | 0      | 0      | 1       |
| Adipose_EA       | svc_EA          | NA                     | NA    | NA     | 1      | 0      | 0      | 0      | 0       |
| Adipose_EA       | svc_SA          | NA                     | NA    | NA     | 0      | 0      | 0      | 0      | 1       |
| Adipose_SA       | Adipose_BA      | NA                     | NA    | NA     | 0      | 0      | 2      | 0      | 0       |
| Adipose_SA       | Adipose_EA      | NA                     | NA    | NA     | 0      | 0      | 1      | 0      | 0       |
| Adipose_SA       | Adipose_SA      | NA                     | NA    | NA     | 0      | 0      | 1      | 0      | 0       |
| Adipose_SA       | Hippo           | NA                     | NA    | NA     | 0      | 0      | 0      | 0      | 0       |
| Adipose_SA       | Liver           | NA                     | NA    | NA     | 0      | 0      | 0      | 0      | 0       |
| Adipose_SA       | Skeletal        | NA                     | NA    | NA     | 0      | 0      | 0      | 0      | 0       |
| Adipose_SA       | Spleen          | NA                     | NA    | NA     | 2      | 0      | 0      | 1      | 0       |
| Adipose_SA       | svc_BA          | NA                     | NA    | NA     | 1      | 0      | 0      | 1      | 0       |
| Adipose_SA       | svc_EA          | NA                     | NA    | NA     | 0      | 0      | 0      | 1      | 0       |

|            |            |    |    |    |    |   |   |    |   |
|------------|------------|----|----|----|----|---|---|----|---|
| Adipose_SA | svc_SA     | NA | NA | NA | 0  | 0 | 0 | 0  | 0 |
| Hippo      | Adipose_BA | NA | NA | NA | 0  | 0 | 0 | 1  | 0 |
| Hippo      | Adipose_EA | NA | NA | NA | 0  | 0 | 1 | 0  | 0 |
| Hippo      | Adipose_SA | NA | NA | NA | 0  | 0 | 1 | 0  | 0 |
| Hippo      | Hippo      | NA | NA | NA | 0  | 0 | 0 | 0  | 0 |
| Hippo      | Liver      | NA | NA | NA | 0  | 2 | 0 | 0  | 0 |
| Hippo      | Skeletal   | NA | NA | NA | 0  | 0 | 1 | 0  | 0 |
| Hippo      | Spleen     | NA | NA | NA | 0  | 2 | 0 | 0  | 0 |
| Hippo      | svc_BA     | NA | NA | NA | 0  | 0 | 1 | 0  | 0 |
| Hippo      | svc_EA     | NA | NA | NA | 0  | 0 | 2 | 0  | 0 |
| Hippo      | svc_SA     | NA | NA | NA | 0  | 1 | 0 | 0  | 0 |
| Liver      | Adipose_BA | NA | NA | NA | 1  | 0 | 0 | 3  | 0 |
| Liver      | Adipose_EA | NA | NA | NA | 0  | 0 | 0 | 0  | 0 |
| Liver      | Adipose_SA | NA | NA | NA | 1  | 0 | 0 | 0  | 0 |
| Liver      | Hippo      | NA | NA | NA | 0  | 0 | 0 | 0  | 0 |
| Liver      | Liver      | NA | NA | NA | 1  | 0 | 0 | 2  | 0 |
| Liver      | Skeletal   | NA | NA | NA | 0  | 0 | 0 | 0  | 0 |
| Liver      | Spleen     | NA | NA | NA | 8  | 0 | 0 | 0  | 0 |
| Liver      | svc_BA     | NA | NA | NA | 1  | 1 | 1 | 1  | 0 |
| Liver      | svc_EA     | NA | NA | NA | 0  | 0 | 0 | 1  | 0 |
| Liver      | svc_SA     | NA | NA | NA | 1  | 0 | 0 | 0  | 0 |
| Skeletal   | Adipose_BA | NA | NA | NA | 0  | 0 | 0 | 5  | 0 |
| Skeletal   | Adipose_EA | NA | NA | NA | 0  | 0 | 1 | 0  | 0 |
| Skeletal   | Adipose_SA | NA | NA | NA | 0  | 0 | 3 | 0  | 0 |
| Skeletal   | Hippo      | NA | NA | NA | 0  | 0 | 0 | 0  | 0 |
| Skeletal   | Liver      | NA | NA | NA | 0  | 0 | 0 | 1  | 0 |
| Skeletal   | Skeletal   | NA | NA | NA | 0  | 0 | 7 | 0  | 0 |
| Skeletal   | Spleen     | NA | NA | NA | 0  | 0 | 1 | 1  | 0 |
| Skeletal   | svc_BA     | NA | NA | NA | 0  | 0 | 1 | 0  | 0 |
| Skeletal   | svc_EA     | NA | NA | NA | 0  | 0 | 1 | 4  | 0 |
| Skeletal   | svc_SA     | NA | NA | NA | 0  | 0 | 1 | 0  | 0 |
| Spleen     | Adipose_BA | NA | NA | NA | 3  | 0 | 0 | 8  | 0 |
| Spleen     | Adipose_EA | NA | NA | NA | 0  | 0 | 1 | 0  | 0 |
| Spleen     | Adipose_SA | NA | NA | NA | 2  | 0 | 1 | 0  | 0 |
| Spleen     | Hippo      | NA | NA | NA | 2  | 0 | 0 | 0  | 0 |
| Spleen     | Liver      | NA | NA | NA | 3  | 1 | 0 | 0  | 0 |
| Spleen     | Skeletal   | NA | NA | NA | 0  | 0 | 0 | 0  | 0 |
| Spleen     | Spleen     | NA | NA | NA | 50 | 3 | 1 | 3  | 0 |
| Spleen     | svc_BA     | NA | NA | NA | 18 | 3 | 1 | 0  | 0 |
| Spleen     | svc_EA     | NA | NA | NA | 1  | 2 | 2 | 1  | 0 |
| Spleen     | svc_SA     | NA | NA | NA | 1  | 1 | 0 | 0  | 0 |
| svc_BA     | Adipose_BA | NA | NA | NA | 1  | 0 | 0 | 3  | 1 |
| svc_BA     | Adipose_EA | NA | NA | NA | 0  | 0 | 1 | 0  | 0 |
| svc_BA     | Adipose_SA | NA | NA | NA | 0  | 0 | 0 | 0  | 0 |
| svc_BA     | Hippo      | NA | NA | NA | 1  | 0 | 0 | 0  | 0 |
| svc_BA     | Liver      | NA | NA | NA | 1  | 0 | 0 | 1  | 0 |
| svc_BA     | Skeletal   | NA | NA | NA | 0  | 0 | 0 | 0  | 0 |
| svc_BA     | Spleen     | NA | NA | NA | 16 | 5 | 0 | 1  | 0 |
| svc_BA     | svc_BA     | NA | NA | NA | 4  | 3 | 0 | 1  | 1 |
| svc_BA     | svc_EA     | NA | NA | NA | 0  | 2 | 1 | 1  | 0 |
| svc_BA     | svc_SA     | NA | NA | NA | 0  | 0 | 0 | 0  | 0 |
| svc_EA     | Adipose_BA | NA | NA | NA | 0  | 0 | 0 | 11 | 0 |
| svc_EA     | Adipose_EA | NA | NA | NA | 0  | 0 | 0 | 0  | 1 |
| svc_EA     | Adipose_SA | NA | NA | NA | 0  | 0 | 0 | 0  | 0 |
| svc_EA     | Hippo      | NA | NA | NA | 0  | 0 | 0 | 0  | 0 |
| svc_EA     | Liver      | NA | NA | NA | 0  | 0 | 0 | 5  | 0 |
| svc_EA     | Skeletal   | NA | NA | NA | 0  | 1 | 0 | 0  | 0 |
| svc_EA     | Spleen     | NA | NA | NA | 0  | 0 | 0 | 6  | 0 |
| svc_EA     | svc_BA     | NA | NA | NA | 0  | 3 | 0 | 0  | 0 |
| svc_EA     | svc_EA     | NA | NA | NA | 0  | 1 | 0 | 10 | 0 |
| svc_EA     | svc_SA     | NA | NA | NA | 0  | 1 | 0 | 0  | 0 |
| svc_SA     | Adipose_BA | NA | NA | NA | 0  | 0 | 0 | 2  | 0 |
| svc_SA     | Adipose_EA | NA | NA | NA | 0  | 0 | 0 | 0  | 0 |
| svc_SA     | Adipose_SA | NA | NA | NA | 0  | 0 | 0 | 0  | 0 |
| svc_SA     | Hippo      | NA | NA | NA | 0  | 0 | 0 | 0  | 0 |
| svc_SA     | Liver      | NA | NA | NA | 0  | 0 | 0 | 0  | 0 |
| svc_SA     | Skeletal   | NA | NA | NA | 0  | 0 | 0 | 0  | 0 |
| svc_SA     | Spleen     | NA | NA | NA | 0  | 0 | 0 | 2  | 0 |
| svc_SA     | svc_BA     | NA | NA | NA | 0  | 2 | 0 | 1  | 0 |

|        |        |    |    |    |   |   |   |   |   |
|--------|--------|----|----|----|---|---|---|---|---|
| svc_SA | svc_EA | NA | NA | NA | 0 | 0 | 0 | 1 | 0 |
| svc_SA | svc_SA | NA | NA | NA | 0 | 0 | 0 | 0 | 0 |

Supplementary Table S5

| Secretory | Receptor  | Day 1 | Day 6 | Day 14 | Week 3 | Week 6 | Week 9 | Week 12 | Week 15 | No. of days on which interaction occurs |
|-----------|-----------|-------|-------|--------|--------|--------|--------|---------|---------|-----------------------------------------|
| APOB      | LRP2      | 42    | 1     | 0      | 1      | 0      | 1      | 4       | 1       | 6                                       |
| MDK       | LRP2      | 28    | 1     | 0      | 1      | 1      | 0      | 6       | 1       | 6                                       |
| APLN      | APLNR     | 16    | 1     | 1      | 3      | 1      | 0      | 2       | 0       | 6                                       |
| FN1       | ITGA3     | 15    | 3     | 1      | 1      | 0      | 0      | 2       | 1       | 6                                       |
| OSM       | LIFR      | 15    | 3     | 1      | 0      | 0      | 1      | 1       | 1       | 6                                       |
| FGF23     | FGFR2     | 18    | 3     | 2      | 0      | 0      | 0      | 2       | 1       | 5                                       |
| FGF2      | FGFR2     | 15    | 1     | 0      | 1      | 0      | 0      | 2       | 1       | 5                                       |
| FN1       | ITGB6     | 15    | 9     | 1      | 0      | 1      | 0      | 0       | 2       | 5                                       |
| PLAU      | LRP2      | 14    | 0     | 0      | 1      | 1      | 0      | 4       | 1       | 5                                       |
| FN1       | ITGA4     | 9     | 12    | 0      | 1      | 0      | 0      | 2       | 1       | 5                                       |
| NPPB      | NPR3      | 45    | 0     | 1      | 0      | 0      | 0      | 1       | 1       | 4                                       |
| TNC       | ITGA8     | 42    | 3     | 1      | 0      | 0      | 0      | 3       | 0       | 4                                       |
| NPNT      | ITGA8     | 36    | 3     | 0      | 0      | 0      | 1      | 3       | 0       | 4                                       |
| NRG1      | ERBB3     | 35    | 0     | 0      | 0      | 1      | 6      | 3       | 0       | 4                                       |
| WNT5A     | FZD5      | 35    | 8     | 0      | 1      | 0      | 0      | 2       | 0       | 4                                       |
| TNC       | ITGB6     | 35    | 9     | 1      | 0      | 0      | 0      | 0       | 2       | 4                                       |
| NPPA      | NPR3      | 35    | 2     | 0      | 1      | 0      | 0      | 1       | 0       | 4                                       |
| IFNA1     | CR2       | 30    | 9     | 0      | 0      | 0      | 0      | 2       | 3       | 4                                       |
| NRG1      | ERBB4     | 30    | 0     | 0      | 0      | 0      | 3      | 6       | 4       | 4                                       |
| SIGLEC1   | SPN       | 30    | 1     | 0      | 2      | 0      | 0      | 1       | 0       | 4                                       |
| NCAM1     | GFR1      | 25    | 1     | 0      | 1      | 0      | 0      | 9       | 0       | 4                                       |
| THPO      | MPL       | 24    | 4     | 0      | 0      | 0      | 1      | 2       | 0       | 4                                       |
| FN1       | LTBP1     | 21    | 6     | 1      | 0      | 0      | 0      | 2       | 0       | 4                                       |
| BTC       | ERBB4     | 18    | 1     | 1      | 0      | 0      | 0      | 4       | 0       | 4                                       |
| EREG      | ERBB4     | 18    | 0     | 1      | 0      | 0      | 0      | 8       | 4       | 4                                       |
| FN1       | ITGA8     | 18    | 3     | 1      | 0      | 0      | 0      | 6       | 0       | 4                                       |
| IL1A      | IL1R2     | 15    | 0     | 1      | 0      | 0      | 0      | 1       | 3       | 4                                       |
| TGFA      | ERBB4     | 12    | 4     | 0      | 2      | 0      | 0      | 2       | 0       | 4                                       |
| FN1       | ITGB3     | 12    | 6     | 1      | 1      | 0      | 0      | 0       | 0       | 4                                       |
| OSM       | OSMR      | 10    | 1     | 1      | 0      | 0      | 0      | 1       | 0       | 4                                       |
| FBN1      | LTBP1     | 7     | 2     | 2      | 0      | 0      | 0      | 1       | 0       | 4                                       |
| VEGFA     | FLT1      | 6     | 1     | 1      | 2      | 0      | 0      | 0       | 0       | 4                                       |
| INHBB     | ACVR1C    | 5     | 1     | 1      | 0      | 0      | 0      | 0       | 1       | 4                                       |
| MMP9      | CD44      | 5     | 0     | 1      | 1      | 1      | 0      | 0       | 0       | 4                                       |
| SLIT2     | ROBO1     | 4     | 4     | 1      | 0      | 0      | 0      | 1       | 0       | 4                                       |
| FN1       | ITGAV     | 3     | 6     | 0      | 0      | 0      | 0      | 2       | 1       | 4                                       |
| COL4A3    | ITGAV     | 2     | 2     | 0      | 0      | 0      | 0      | 1       | 1       | 4                                       |
| EGFR      | MET       | 1     | 1     | 1      | 1      | 0      | 0      | 0       | 0       | 4                                       |
| HGF       | MET       | 1     | 1     | 0      | 1      | 0      | 0      | 1       | 0       | 4                                       |
| LAMA3     | ITGA3     | 30    | 1     | 2      | 0      | 0      | 0      | 0       | 0       | 3                                       |
| IL24      | IL20RB    | 28    | 0     | 0      | 0      | 0      | 0      | 2       | 1       | 3                                       |
| NPY       | PPYR1     | 24    | 4     | 4      | 0      | 0      | 0      | 0       | 0       | 3                                       |
| IGF2      | INSR      | 20    | 1     | 0      | 0      | 0      | 0      | 0       | 1       | 3                                       |
| COL6A3    | ITGA2     | 20    | 0     | 0      | 0      | 0      | 0      | 3       | 1       | 3                                       |
| COL6A3    | ITGB3     | 20    | 2     | 1      | 0      | 0      | 0      | 0       | 0       | 3                                       |
| PDGFB     | PDGFRA    | 20    | 6     | 0      | 0      | 0      | 0      | 1       | 0       | 3                                       |
| FGF1      | FGFR2     | 18    | 2     | 0      | 0      | 0      | 0      | 0       | 1       | 3                                       |
| PLG       | AMOT      | 16    | 1     | 0      | 0      | 0      | 0      | 3       | 0       | 3                                       |
| IGF2      | IGF1R     | 16    | 1     | 0      | 0      | 0      | 0      | 0       | 1       | 3                                       |
| NPY       | NPFYR2    | 16    | 8     | 0      | 0      | 0      | 0      | 0       | 2       | 3                                       |
| NTS       | NTSR2     | 16    | 2     | 0      | 0      | 0      | 0      | 1       | 0       | 3                                       |
| CXCL12    | CCR4      | 15    | 0     | 2      | 0      | 0      | 0      | 2       | 0       | 3                                       |
| COL1A1    | CD44      | 15    | 0     | 0      | 0      | 1      | 0      | 2       | 0       | 3                                       |
| LIFR      | CNTFR     | 15    | 9     | 0      | 0      | 0      | 0      | 0       | 2       | 3                                       |
| PLAT      | LRP1B     | 14    | 0     | 0      | 2      | 0      | 0      | 1       | 0       | 3                                       |
| CALCA     | CALCR1    | 12    | 1     | 0      | 0      | 0      | 0      | 2       | 0       | 3                                       |
| CXCL12    | CXCR4     | 12    | 0     | 2      | 0      | 0      | 0      | 1       | 0       | 3                                       |
| FGF23     | FGFR3     | 12    | 3     | 0      | 0      | 0      | 0      | 6       | 0       | 3                                       |
| COL1A1    | ITGA2     | 12    | 0     | 0      | 0      | 0      | 0      | 3       | 1       | 3                                       |
| JAG1      | NOTCH2    | 12    | 0     | 1      | 0      | 0      | 0      | 1       | 0       | 3                                       |
| TNFRSF11  | TNFRSF11A | 12    | 3     | 0      | 0      | 0      | 0      | 2       | 0       | 3                                       |
| FGF2      | FGFR3     | 10    | 1     | 0      | 0      | 0      | 0      | 6       | 0       | 3                                       |
| IL22      | IL22RA2   | 10    | 0     | 0      | 0      | 0      | 1      | 1       | 0       | 3                                       |
| COL6A3    | ITGA1     | 10    | 1     | 0      | 0      | 0      | 0      | 2       | 0       | 3                                       |
| INHBC     | ACVR1B    | 9     | 0     | 0      | 1      | 0      | 0      | 3       | 0       | 3                                       |
| IL1A      | IL1RAP    | 9     | 0     | 0      | 0      | 0      | 0      | 3       | 3       | 3                                       |
| COL2A1    | DDR1      | 8     | 3     | 0      | 2      | 0      | 0      | 0       | 0       | 3                                       |
| COL4A3    | ITGB3     | 8     | 2     | 1      | 0      | 0      | 0      | 0       | 0       | 3                                       |
| FGFR2     | EPHA4     | 6     | 1     | 0      | 0      | 0      | 0      | 2       | 0       | 3                                       |
| LG1       | ADAM22    | 4     | 1     | 0      | 0      | 0      | 0      | 2       | 0       | 3                                       |
| KNG1      | PLAUR     | 4     | 1     | 0      | 0      | 0      | 0      | 3       | 0       | 3                                       |
| BTC       | EGFR      | 3     | 1     | 1      | 0      | 0      | 0      | 0       | 0       | 3                                       |
| DPP4      | PTPRC     | 3     | 4     | 0      | 0      | 0      | 0      | 0       | 6       | 3                                       |
| TGFA      | EGFR      | 2     | 4     | 0      | 1      | 0      | 0      | 0       | 0       | 3                                       |
| CALCA     | RAMP1     | 2     | 2     | 0      | 0      | 0      | 0      | 1       | 0       | 3                                       |
| DKK2      | LRP6      | 1     | 0     | 0      | 1      | 2      | 0      | 0       | 0       | 3                                       |
| C3        | C3AR1     | 0     | 1     | 0      | 1      | 1      | 0      | 0       | 0       | 3                                       |
| NPPB      | NPR2      | 54    | 0     | 2      | 0      | 0      | 0      | 0       | 0       | 2                                       |
| NPPA      | NPR2      | 42    | 0     | 0      | 2      | 0      | 0      | 0       | 0       | 2                                       |
| PNOC      | OPRL1     | 42    | 0     | 0      | 0      | 0      | 0      | 6       | 0       | 2                                       |
| TG        | LRP2      | 35    | 2     | 0      | 0      | 0      | 0      | 0       | 0       | 2                                       |
| GHRL      | GHSR      | 30    | 0     | 0      | 0      | 0      | 0      | 1       | 0       | 2                                       |
| TNC       | ITGB1     | 28    | 0     | 0      | 0      | 0      | 0      | 1       | 0       | 2                                       |
| PYY       | PPYR1     | 24    | 2     | 0      | 0      | 0      | 0      | 0       | 0       | 2                                       |
| EDN3      | EDNBR     | 20    | 0     | 0      | 0      | 0      | 0      | 0       | 1       | 2                                       |
| COL6A3    | ITGB1     | 20    | 0     | 0      | 0      | 0      | 0      | 1       | 0       | 2                                       |
| NXPH1     | NRXN1     | 18    | 0     | 0      | 0      | 0      | 0      | 3       | 0       | 2                                       |
| INHBB     | ACVR1B    | 15    | 1     | 0      | 0      | 0      | 0      | 0       | 0       | 2                                       |
| EDN3      | EDNRA     | 15    | 1     | 0      | 0      | 0      | 0      | 0       | 0       | 2                                       |
| IL7       | IL7R      | 15    | 0     | 0      | 0      | 0      | 0      | 3       | 0       | 2                                       |
| SLIT2     | ROBO2     | 14    | 0     | 0      | 0      | 0      | 0      | 2       | 0       | 2                                       |
| UCN       | CRHR1     | 12    | 4     | 0      | 0      | 0      | 0      | 0       | 0       | 2                                       |
| CCL7      | DARC      | 12    | 2     | 0      | 0      | 0      | 0      | 0       | 0       | 2                                       |
| COL1A1    | DDR2      | 12    | 0     | 0      | 0      | 0      | 0      | 0       | 1       | 2                                       |
| FGF1      | FGFR3     | 12    | 2     | 0      | 0      | 0      | 0      | 0       | 0       | 2                                       |
| IL2       | IL2RA     | 12    | 0     | 2      | 0      | 0      | 0      | 0       | 0       | 2                                       |
| COL1A1    | ITGB1     | 12    | 0     | 0      | 0      | 0      | 0      | 1       | 0       | 2                                       |
| FN1       | ITGB1     | 12    | 0     | 0      | 0      | 0      | 0      | 2       | 0       | 2                                       |
| CCL7      | CCR2      | 9     | 4     | 0      | 0      | 0      | 0      | 0       | 0       | 2                                       |
| BTC       | ERBB2     | 9     | 0     | 1      | 0      | 0      | 0      | 0       | 0       | 2                                       |
| BDNF      | NTRK2     | 9     | 0     | 0      | 0      | 1      | 0      | 0       | 0       | 2                                       |
| GDF5      | BMPRI1A   | 8     | 6     | 0      | 0      | 0      | 0      | 0       | 0       | 2                                       |



|       |       |   |   |   |   |   |   |   |   |   |
|-------|-------|---|---|---|---|---|---|---|---|---|
| SLIT2 | ROBO4 | 0 | 0 | 0 | 1 | 0 | 0 | 0 | 0 | 1 |
| RELN  | VLDLR | 0 | 0 | 0 | 0 | 1 | 0 | 0 | 0 | 1 |



Supplementary Table S6

| HFC         |              |          |          |          |          |          |  |                                    |
|-------------|--------------|----------|----------|----------|----------|----------|--|------------------------------------|
| Interaction |              | Days     |          |          |          |          |  | No. of days the interaction occurs |
| Sec         | Rec          | 35       | 56       | 77       | 98       | 119      |  |                                    |
| APOB        | LRP2         | 1        | 0        | 1        | 4        | 1        |  | 4                                  |
| <b>MDK</b>  | <b>LRP2</b>  | <b>1</b> | <b>1</b> | <b>0</b> | <b>6</b> | <b>1</b> |  | <b>4</b>                           |
| PLAU        | LRP2         | 1        | 1        | 0        | 4        | 1        |  | 4                                  |
| APLN        | APLNR        | 3        | 1        | 0        | 2        | 0        |  | 3                                  |
| FN1         | ITGA3        | 1        | 0        | 0        | 2        | 1        |  | 3                                  |
| OSM         | LIFR         | 0        | 0        | 1        | 1        | 1        |  | 3                                  |
| <b>FGF2</b> | <b>FGFR2</b> | <b>1</b> | <b>0</b> | <b>0</b> | <b>2</b> | <b>1</b> |  | <b>3</b>                           |
| FN1         | ITGA4        | 1        | 0        | 0        | 2        | 1        |  | 3                                  |
| <b>NRG1</b> | <b>ERBB3</b> | <b>0</b> | <b>1</b> | <b>6</b> | <b>3</b> | <b>0</b> |  | <b>3</b>                           |
| NRG1        | ERBB4        | 0        | 0        | 3        | 6        | 4        |  | 3                                  |

| HF75        |              |          |          |          |          |          |  |                                    |
|-------------|--------------|----------|----------|----------|----------|----------|--|------------------------------------|
| Interaction |              | Days     |          |          |          |          |  | No. of days the interaction occurs |
| Sec         | Rec          | 35       | 56       | 77       | 98       | 119      |  |                                    |
| <b>NRG1</b> | <b>ERBB3</b> | <b>2</b> | <b>2</b> | <b>2</b> | <b>6</b> | <b>2</b> |  | <b>5</b>                           |
| <b>FGF2</b> | <b>FGFR2</b> | <b>2</b> | <b>1</b> | <b>2</b> | <b>2</b> | <b>0</b> |  | <b>4</b>                           |
| BTC         | ERBB4        | 2        | 0        | 6        | 4        | 0        |  | 3                                  |
| THPO        | MPL          | 2        | 0        | 1        | 0        | 1        |  | 3                                  |
| NRG1        | ERBB4        | 2        | 0        | 3        | 6        | 0        |  | 3                                  |
| CRLF1       | CNTRF        | 0        | 0        | 2        | 2        | 1        |  | 3                                  |
| FGF2        | FGFR3        | 4        | 0        | 1        | 2        | 0        |  | 3                                  |
| LIFR        | CNTRF        | 4        | 0        | 1        | 4        | 0        |  | 3                                  |
| <b>MDK</b>  | <b>LRP2</b>  | <b>2</b> | <b>0</b> | <b>2</b> | <b>2</b> | <b>0</b> |  | <b>3</b>                           |
| NPNT        | ITGA8        | 2        | 0        | 0        | 4        | 1        |  | 3                                  |

**Supplementary Table S7**

**P-value (two tailed :  $p_1 \neq p_2$ ) [ $\alpha = 0.05$ ]**

|                                |      |            | 14        | 35        | 56        | 77        | 98        | 119       | 140       |
|--------------------------------|------|------------|-----------|-----------|-----------|-----------|-----------|-----------|-----------|
| <b>Metabolism Rec (2050)</b>   | Up   | HFHSD      | 0.3989423 | 0.0149709 | 0.3499546 | 0.3221541 | 0.0933515 | 0.0480199 | 0.0574156 |
|                                |      | HFHSD+KAL1 |           |           |           |           |           |           |           |
|                                | Down | HFHSD      | 0.3989423 | 0.3864746 | 0.3562809 | 0.0053641 | 0.3240196 | 0.3513682 | 0.0799158 |
|                                |      | HFHSD+KAL1 |           |           |           |           |           |           |           |
| <b>Metabolism Sec (2840)</b>   | Up   | HFHSD      | 0.3989423 | 0.0056644 | 0.3175396 | 0.3989423 | 0.3593948 | 0.0450829 | 0.1878482 |
|                                |      | HFHSD+KAL1 |           |           |           |           |           |           |           |
|                                | Down | HFHSD      | 0.3989423 | 0.2803433 | 0.3969748 | 0.0104114 | 0.036441  | 0.015181  | 0.3989423 |
|                                |      | HFHSD+KAL1 |           |           |           |           |           |           |           |
| <b>Inflammatory Rec (620)</b>  | Up   | HFHSD      | 0.3989423 | 0.2762484 | 0.3664414 | 0.3927805 | 0.0469191 | 0.0235771 | 0.1267583 |
|                                |      | HFHSD+KAL1 |           |           |           |           |           |           |           |
|                                | Down | HFHSD      | 0.3989423 | 0.3927805 | 0.3403343 | 0.2403944 | 0.3837333 | 0.3908818 | 0.3260956 |
|                                |      | HFHSD+KAL1 |           |           |           |           |           |           |           |
| <b>Inflammatory Sec (1080)</b> | Up   | HFHSD      | 0.3989423 | 0.131395  | 0.2079956 | 0.3585399 | 0.2287863 | 0.372863  | 0.3989423 |
|                                |      | HFHSD+KAL1 |           |           |           |           |           |           |           |
|                                | Down | HFHSD      | 0.3989423 | 0.340759  | 0.3132605 | 0.3547135 | 0.036146  | 0.0917717 | 0.3517371 |
|                                |      | HFHSD+KAL1 |           |           |           |           |           |           |           |

### Supplementary Table S8

#### Corresponding to figure 5A P-value (two tailed : $p_1 \neq p_2$ ) [ $\alpha = 0.05$ ]

|            | Rec         |             | Sec         |             |
|------------|-------------|-------------|-------------|-------------|
|            | Up          | Down        | Up          | Down        |
| Adipose_BA | 0.374442299 | 0.186886971 | 0.383967715 | 0.259302369 |
| Adipose_EA | 0.391003429 | 0.300136722 | 0.227174788 | 0.366146099 |
| Adipose_SA | 0.380908139 | 0.34370742  | 0.289691553 | 0.289691553 |
| Hippo      | NA          | 0.319780937 | 0.291713824 | 0.253577601 |
| Liver      | 0.123347781 | 0.381907532 | 0.273217258 | 0.06351906  |
| Skeletal   | 0.026168431 | 0.287689105 | 0.02830705  | 0.269758787 |
| Spleen     | 0.343239672 | 0.39308468  | 0.087404077 | 0.304939264 |
| SCV_BA     | 0.05980294  | 0.180342014 | 0.381882319 | 0.397321883 |
| SVC_EA     | 0.39760608  | 0.39760608  | 0.136758267 | 0.265782619 |
| SVC_SA     | 0.396919125 | 0.236159746 | 0.394276049 | 0.392972773 |

#### Corresponding to figure 5B P-value (two tailed : $p_1 \neq p_2$ ) [ $\alpha = 0.05$ ]

|            | Rec               |                   | Sec               |                   |
|------------|-------------------|-------------------|-------------------|-------------------|
|            | Sec Up & Rec Down | Sec Down & Rec Up | Sec Up & Rec Down | Sec Down & Rec Up |
| Adipose_BA | 0.371025666       | 0.376060243       | 0.38254877        | 0.38254877        |
| Adipose_EA | #VALUE!           | 0.379057088       | 0.382323943       | 0.386319963       |
| Adipose_SA | 0.395918906       | 0.370884267       | 0.384326676       | 0.398138291       |
| Hippo      | NA                | 0.38276998        | 0.398782478       | 0.384687703       |
| Liver      | 0.376120665       | 0.369281403       | 0.397421333       | 0.380818456       |
| Skeletal   | 0.398229531       | 0.392507296       | 0.370887838       | 0.368663538       |
| Spleen     | 0.368621897       | 0.368621897       | 0.395228996       | 0.385097499       |
| SCV_BA     | 0.368722508       | 0.38797117        | 0.369108244       | 0.369297645       |
| SVC_EA     | 0.39894228        | 0.39894228        | 0.39894228        | 0.39894228        |
| SVC_SA     | 0.39894228        | 0.39894228        | 0.39894228        | 0.39894228        |
